# Supplementary material for: Identification of prognostic candidate signatures by systematically revealing transcriptome characteristics in lung adenocarcinoma with differing tumor microenvironment immune phenotypes
Source: publisher site journal article supplement (doi:10.18632/aging.204112), 2022-06-07
Supplement: Supplementary file [file aging-v14i11-204112-supplementary-material-SD1.pdf]

SUPPLEMENTARY FIGURES

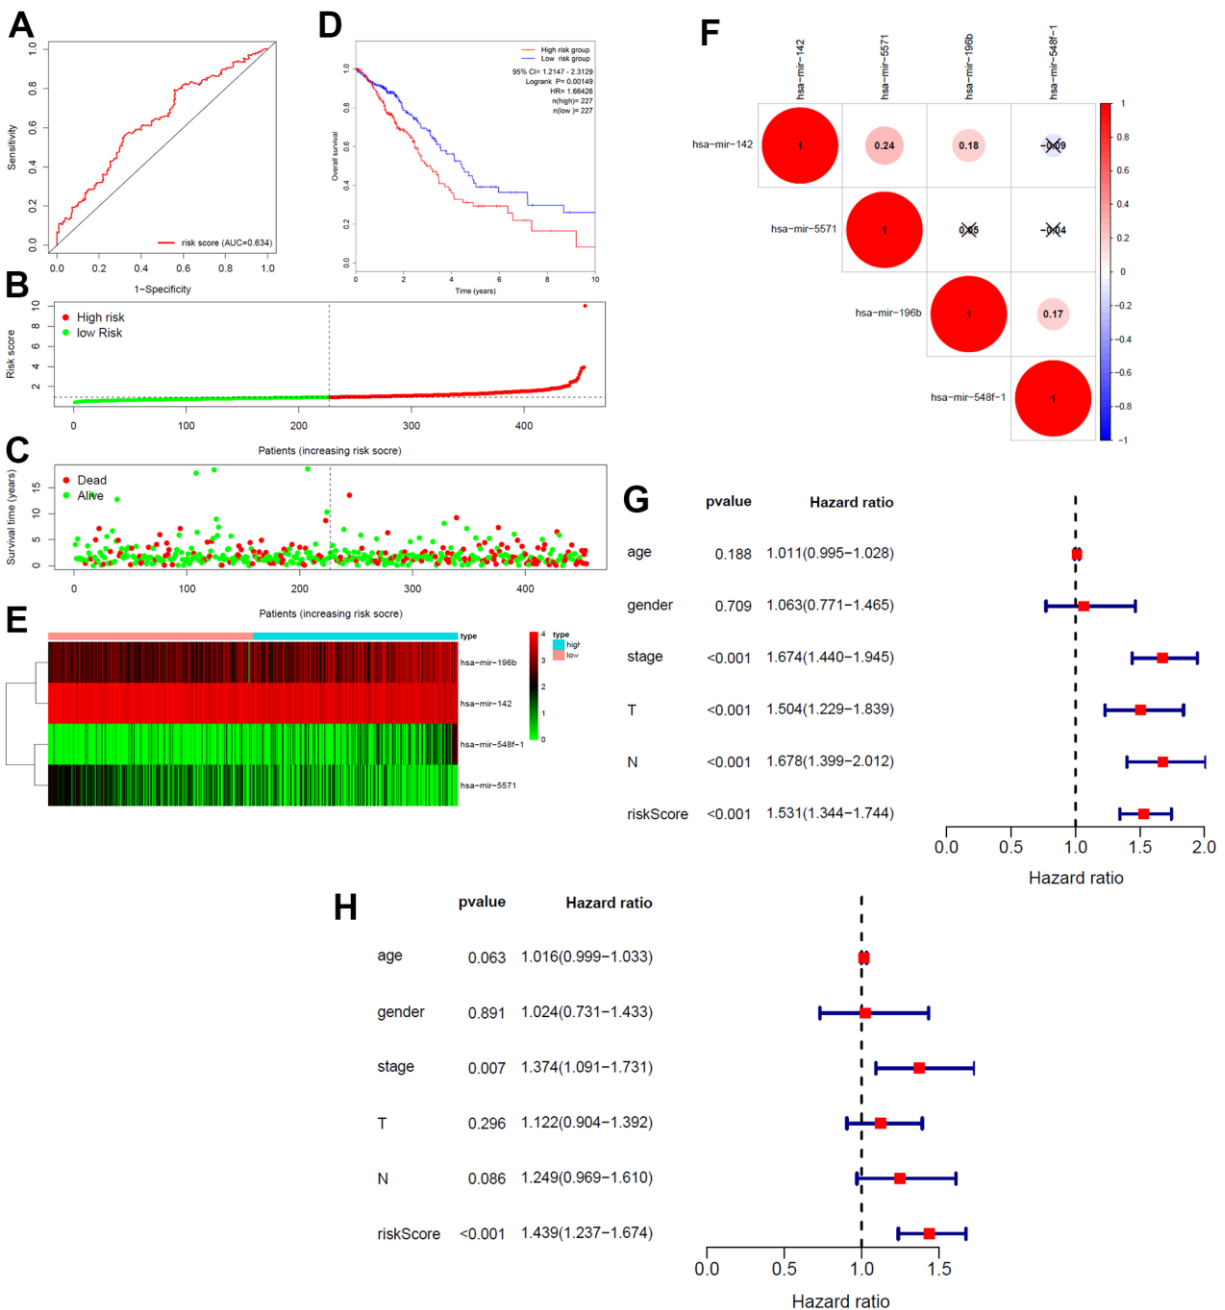

**Supplementary Figure 1. Prognostic signature analysis of key DE miRNAs.** (A) ROC curve. The 3-year AUC of the 4-miRNA signature (mir-196b, mir-142, mir-548f-1, mir-5571) was 0.634 in the ROC curve. (B) Risk score distribution. According to the median risk score, the patients were divided into the high- and low-risk groups. (C) Survival overview. The distribution of survival times of LUAD patients in the high- and low-risk subgroups. (D) Survival curve. LUAD patients had a higher HR and a lower OS in the high-risk group ( $p=0.00149$ , HR=1.6643, 95%CI=1.2147-2.3129). (E) The expression heatmap of four miRNAs. Two miRNAs (mir-196b and mir-548f-1) were highly expressed and 2 miRNAs (mir-142 and mir-5571) were lowly expressed in the high-risk group. (F) The expression correlations among 4 miRNAs. The correlations among 4 miRNAs were low in expression. (G, H) Independently prognostic analysis. The 4-miRNA risk signature was significantly correlated with the survival of LUAD patients by a univariate ( $p<0.001$ , HR=1.531, 95%CI=1.344-1.744) and a multivariate ( $p<0.001$ , HR=1.439, 95%CI=1.237-1.674) Cox regression analyses. ROC, receiver operating characteristic; AUC, area under the curve; LUAD, lung adenocarcinoma; HR, hazard ratio; OS, overall survival; CI, confidence interval.

# DElncRNAs associated with the OS of LUAD patients

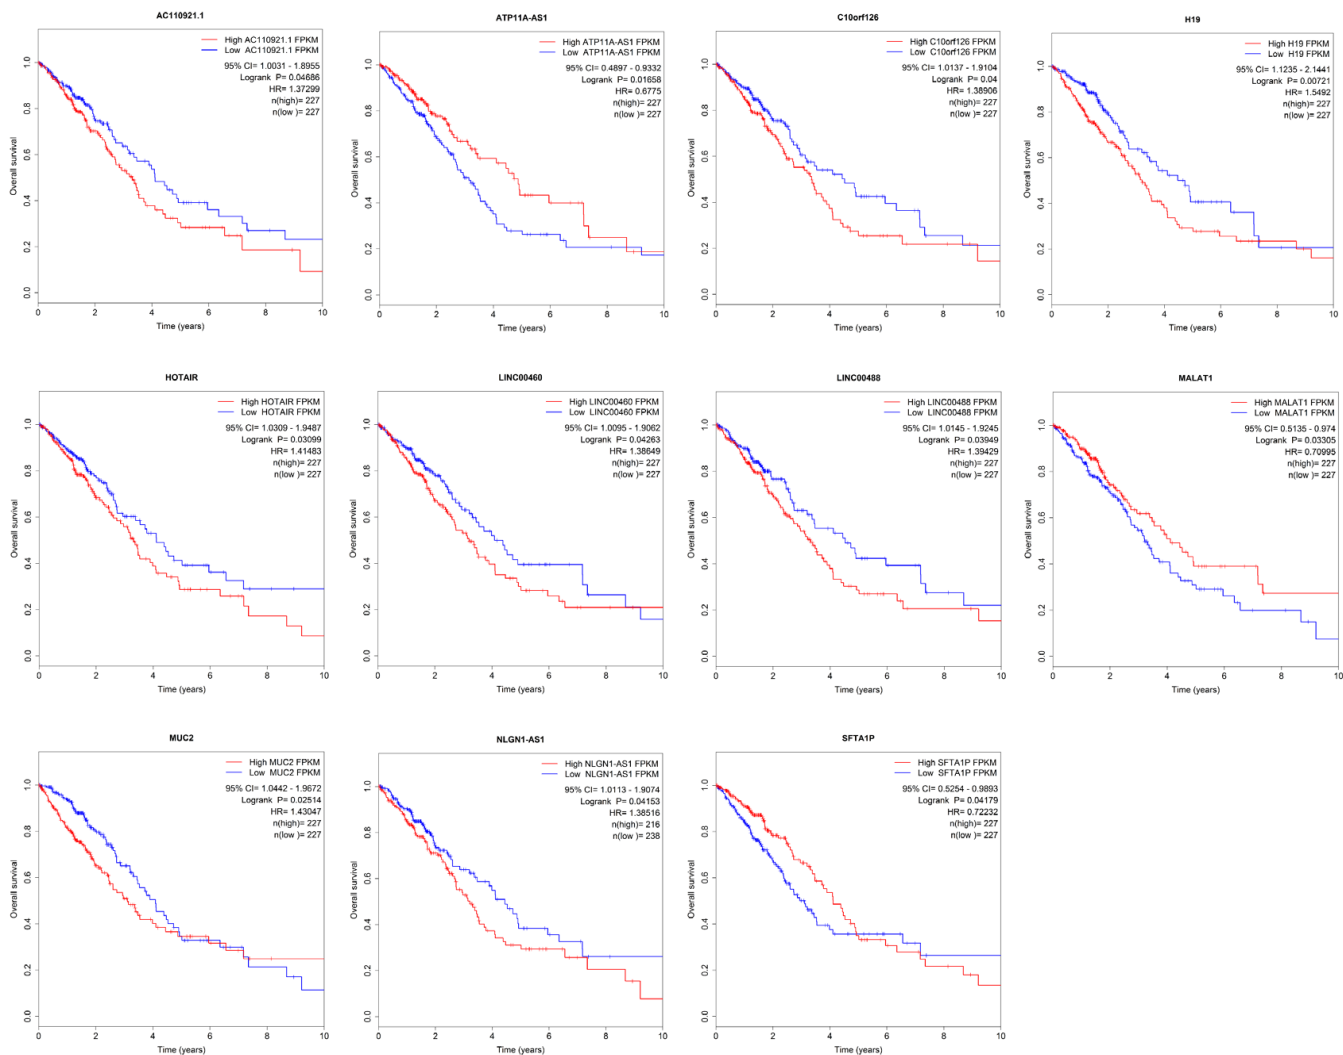

# DEmRNAs associated with the OS of LUAD patients

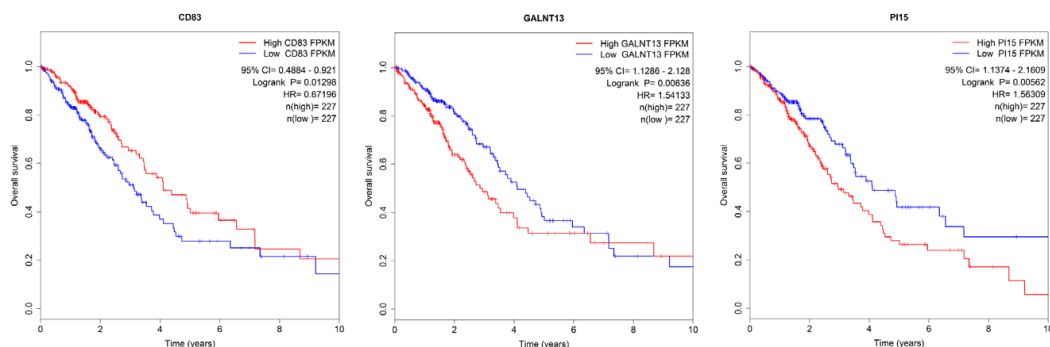

Supplementary Figure 2. Survival curves of DERNAs in the ceRNA network.

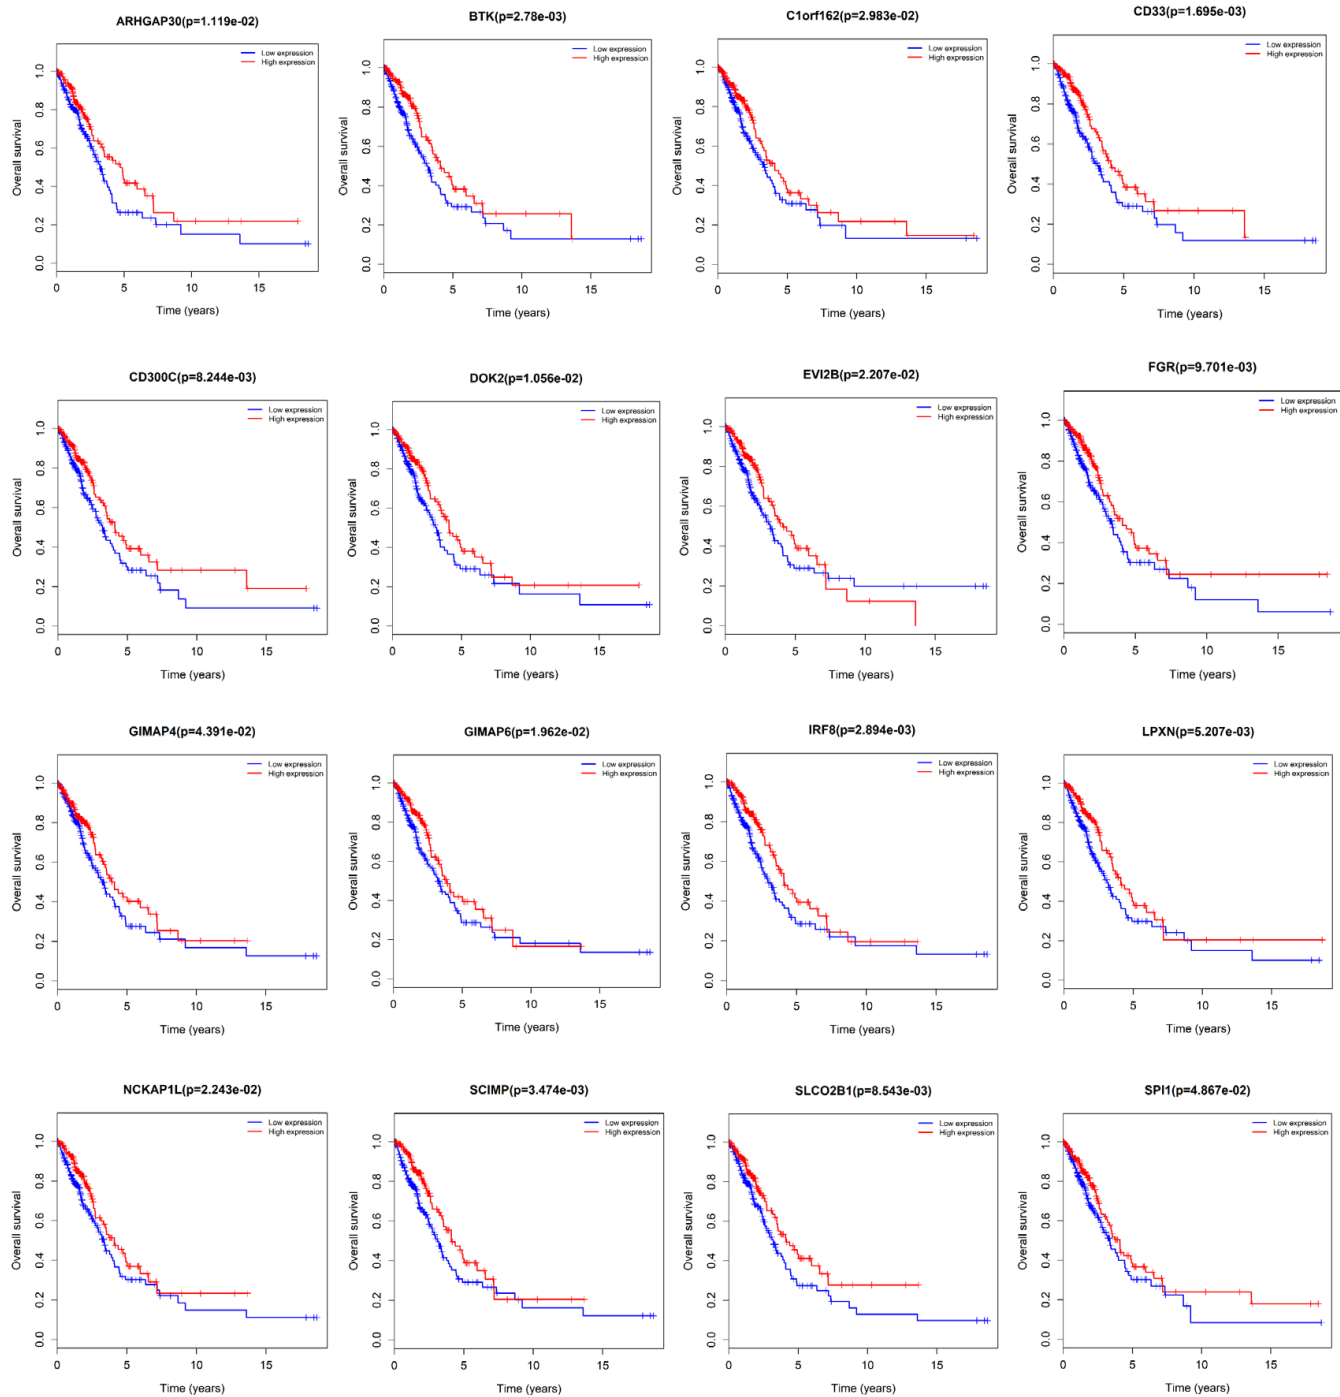

Supplementary Figure 3. Survival curves of 16 genes.
