# Supplementary material for: Identification of prognostic candidate signatures by systematically revealing transcriptome characteristics in lung adenocarcinoma with differing tumor microenvironment immune phenotypes
Source: Aging (Albany NY). 2022 Jun 7;14(11):4786–818. doi: 10.18632/aging.204112 (PMC9217709; doi:10.18632/aging.204112)
Supplement: Supplementary Table 1 [file aging-14-204112-s002.xlsx]

## Sheet: Sheet1
Supplementary Table 1. Common DERNAs.
DEmRNA	DElncRNA	DEmiRNA
STX11	AL606469.1	hsa-mir-184
FCN3	HSPC324	hsa-mir-1-2
AGER	FENDRR	hsa-mir-1-1
FABP4	LINC00968	hsa-mir-142
FMO2	LINC01082	hsa-mir-196a-2
CD101	MIR3945HG	hsa-mir-196a-1
GPD1	AC135012.3	hsa-mir-196b
GIMAP8	LINC00656	hsa-mir-105-1
CAV1	LINC02016	hsa-mir-1258
HBB	AC026369.3	hsa-mir-767
STARD8	AL109741.1	hsa-mir-5571
INMT	AC011899.2	hsa-mir-4788
GPIHBP1	AC128709.3	hsa-mir-3664
MCEMP1	SMIM25	hsa-mir-675
CD300LG	LINC00551	hsa-mir-449c
ADAMTS8	LINC01352	hsa-mir-122
CLEC4M	AC004947.1	hsa-mir-449b
ARC	LINC01977	hsa-mir-1911
ANKRD1	AC011899.3	hsa-mir-6850
CD5L	LINC00702	hsa-mir-548y
TCF21	LINC01506	hsa-mir-1251
GLIPR2	LINC01624	hsa-mir-449a
UPK3B	HLX-AS1	hsa-mir-552
GIMAP6	TBX5-AS1	hsa-mir-206
DNASE1L3	MGC27382	hsa-mir-1298
SIRPB1	LINC02154	hsa-mir-519a-1
GIMAP1	BX276092.9	hsa-mir-548f-1
TRPV2	AL109754.1	hsa-mir-521-1
FGR	AL390036.1	hsa-mir-522
SPN	C5orf64	hsa-mir-512-1
DPEP2	LINC00844	hsa-mir-519a-2
AC008763.3	LINC01645	hsa-mir-1912
MFAP4	AC069360.1	hsa-mir-512-2
AGRP	LINC02416	hsa-mir-520c
VEGFD	AL357054.4	hsa-mir-527
CD52	LINC00211	hsa-mir-520f
CDO1	LINC01412	hsa-mir-518f
GRIA1	AC018755.4	hsa-mir-518a-1
HTR3C	AC004988.1	hsa-mir-520g
PRAM1	AC108134.3	hsa-mir-1283-2
OLR1	AC004921.1	hsa-mir-498
MARCO	LINC01614	hsa-mir-520b
MS4A7	AC243960.3	hsa-mir-520h
ITM2A	AC244153.1	hsa-mir-518a-2
OSCAR	AP001189.5	hsa-mir-519c
SFTPC	LINC01914
FPR2	AC090559.1
RASGRP4	AC105384.1
SERTM1	AP003064.2
LINC01314	AC013457.1
DNASE2B	AC025470.2
SIGLEC11	AC063944.1
PTCRA	AC022784.1
C5AR1	LINC02362
MSR1	LINC00942
C1orf162	AC069209.1
KRT79	AL445426.1
ADH1B	AC006033.2
GIMAP7	AL157895.1
VSIG4	AC083949.1
ACP5	LINC00525
CD300C	LINC00880
HAS1	GAS1RR
COL6A6	AC245884.11
ADGRE1	LINC01827
C6orf229	AL731557.1
PTPRQ	AF127936.2
CD83	MYOSLID
RSPO1	AC010776.2
CASS4	AC026904.3
ALOX5	AL049539.1
DOK2	LINC01150
CCL23	USP30-AS1
ANGPTL7	AC007386.2
FGFBP2	AL645608.3
IL7R	AL365203.1
HLA-E	AC112721.2
ADRA1A	AC089983.1
CLDN18	AC079160.1
JAML	AC040170.1
FOLR3	LINC00460
MRC1	AC084262.1
NCF2	HOTAIR
RETN	AL355916.1
CCL14	AC026785.3
LILRA5	AC010789.1
ACKR1	AP005230.1
ALOX5AP	LINC00858
GIMAP4	LINC02313
EGR2	LINC02029
BCHE	LINC01926
ARHGEF6	LINC00973
GPA33	LINC02471
C10orf128	LINC00519
KL	LINC01748
RAB26	LINC01214
CYP27A1	SFTA1P
FPR1	GAS6-AS2
GMFG	AC108676.1
PLEKHO2	AC083809.1
TMEM150B	AL512413.1
ADTRP	AC104699.1
LILRA1	AC128709.2
SPI1	AC020891.2
SLC7A7	LINC01971
DCSTAMP	ERVH48-1
CD300LF	HOXC-AS3
APOBR	AC090192.2
SELPLG	AC092436.2
PITX2	AC093484.1
SERPING1	AJ011932.1
SLC31A2	AL139339.1
CAMP	AL109761.1
TIMP3	LINC01468
CCRL2	LINC02285
PILRA	AC112721.1
IL1RL1	AC074327.1
CHRDL1	AL022324.3
CCDC150	AL035446.1
DNAH14	U62317.1
CD68	AL133284.1
LILRB3	LINC02418
SLC15A3	AC019155.3
HK3	POU6F2-AS2
TERT	LINC01287
CABYR	ITGB2-AS1
STAC	AC104261.1
SCIMP	AC127164.1
SAMHD1	AP002954.1
CGREF1	AL035530.1
TLR4	AC092652.2
CHRNA5	LINC02387
DNAJC12	LINC02015
MMP13	AC090125.1
BTK	LINC00944
ZNF695	AC109779.1
YBX2	AF127577.3
KLHL33	AC092484.1
TCEAL2	LINC01611
C2CD4D	AC012531.1
CASKIN1	AC026462.3
CD33	AC027627.1
CARD16	LINC02428
SIRPA	AL662860.1
HVCN1	AC015660.3
TLR8	AL445183.2
GFRA2	MUC2
LIPA	AC007608.1
CEACAM21	AC026904.2
LPXN	FP325330.3
SFTPA1	AC022733.1
C1QA	LINC00582
TYROBP	LINC00996
APOL3	AC079630.2
DCN	LINC01366
SYNDIG1L	LINC01633
SLCO2B1	AC116345.1
PTX3	AL122019.1
PTGDS	AC244205.1
AKR7A3	AC108451.2
FOXP3	AF015262.1
PRAME	AC092652.1
IL22RA2	AC106799.1
KCNJ5	LINC01804
ARHGAP30	AC025280.1
SCGB1A1	PANCR
TNFSF11	LINC01281
SPP2	FLJ22447
KCNAB2	HOXC-AS1
SIGLEC5	SSTR5-AS1
C1QB	MIR2052HG
MNDA	LINC02289
CCL2	AC092535.1
GPC2	AC092667.1
IGFL2	AC004884.2
SFTPA2	AL158835.1
EVI2B	AC020891.3
DERL3	AC106785.2
TPSAB1	AC106799.2
PIK3R5	AC079466.1
SCN2B	AC239584.1
PROC	POU6F2-AS1
AL049634.2	AP005328.1
PPP1R17	AC211433.1
FCN1	AP000821.1
LY86	AC023421.1
PTPRO	AC069277.1
C1orf61	AC005291.2
MMP12	LDLRAD4-AS1
CNTFR	LINC01297
F11	LINC02126
FGL1	AC011632.1
TPSB2	AC098798.1
OR51E1	LINC01980
SLC2A5	AC007998.3
NFAM1	LINC00824
LILRA6	AC106799.3
RHOV	AC246787.2
ADCY8	LINC02466
NCKAP1L	AL022313.2
S100P	DSCAM-AS1
NPW	HOXA10-AS
RNFT2	LINC02345
LAPTM5	AC025822.2
MYO1F	LINC02178
RCOR2	AC008268.1
EPYC	AC126323.6
NKAPL	LINC02048
GPX2	AC117402.1
RTBDN	SNAP47-AS1
CST4	LINC02293
HCK	AC109454.3
FCER1G	AC015660.2
VGF	AC069120.3
INHA	LINC01629
NRROS	AC079384.1
SIRPB2	AC073316.1
PADI1	LINC01206
CPA3	AC007848.1
CLEC4E	AC007249.1
NCF1	AL023755.1
PCP4	LINC02109
PRB3	AP003555.3
ITGAL	AC009227.1
ADRA1D	AC079209.1
LST1	AC011700.1
ERVFRD-1	AL034345.2
CTSG	AC109446.3
PRSS50	LINC01010
TLL2	AC117386.1
RNF186	LINC02223
C7	TBC1D3P1-DHX40P1
CDH19	KCNQ1OT1
MMP3	AL611929.1
ARTN	LINC01299
TCN1	AL133264.2
NAT8L	LINC00513
KRT16	AC022126.1
ABCA4	PLUT
CCBE1	CTD-3080P12.3
POU4F1	LINC00898
TUBB2B	AC021683.2
IL4I1	AP003119.1
APOC1	AC135782.1
CD37	LINC01510
CD244	AC073578.1
GAL	AC025244.1
LY6D	LINC02195
AIM2	AC069120.1
SHOX2	LINC01485
FGF19	AP000542.2
FGB	AC108025.2
IGF2BP1	AC058791.1
SLA	AC008115.2
P2RX1	AC090502.3
CPS1	AC093151.3
IL17C	AP001429.1
BPIFA2	H19
DPT	AL117355.1
CEACAM7	ST7-OT4
DEPDC7	AC008957.1
SMAD9	AC110790.1
GNGT2	PRICKLE2-AS1
AQP9	AC002378.1
C12orf56	AC084026.2
GBP4	LINC01543
IGLL5	AL160271.1
ATP6V0D2	AC008109.1
LCN12	AL356133.2
CYBB	AC006946.3
SRPX	FAM30A
2020-09-12	LINC00943
CX3CR1	AC096734.1
CNGA3	LINC01967
FERMT3	AC006159.2
PCSK1	CHL1-AS1
ALB	AP000842.3
CRABP1	CPS1-IT1
RASGRP2	AC021079.1
SOX11	AF274573.2
SIGLEC7	C15orf54
SIGLEC1	AC005808.1
SLCO1A2	MIR3142HG
SLC15A1	AC004585.1
BCL2A1	TBL1XR1-AS1
GPR84	MIR181A1HG
MATK	AC026336.3
C9orf84	AC091179.2
DDO	AF121898.1
ABCC11	LINC00704
C11orf21	LINC00319
LCP1	KCNQ5-IT1
MS4A4A	AL023754.1
TSHR	AL731897.1
PDX1	LINC02454
EMP3	AC005291.1
COLEC10	AC092828.1
HOXC11	AC122694.1
UCHL1	AC110741.1
TRIM67	AC055717.2
HCST	AL589743.4
LRRC25	AC096759.2
FAT3	LINC01913
REG4	LINC02404
CD53	ZBTB20-AS1
PTPRN	AC104574.2
NPC1L1	AC105243.1
PPP1R16B	AC016550.2
CLDN6	LINC02152
SPINK4	TUSC8
FLRT1	AC131971.1
ITGAX	AL022158.1
SIGLEC14	AC084026.1
C19orf38	AL451137.1
IL34	LBX1-AS1
FCGR3A	LINC01456
NXF3	TMEM132D-AS1
GPR65	AC011893.1
HOXC10	DSG1-AS1
SIX2	AC090673.2
ZNF670-ZNF695	AC087855.2
TNNI2	LINC02245
CHGB	AL773572.1
COL6A5	AP005328.2
LAIR1	LINC01257
MYCN	LINC00645
ADH1A	LINC00470
UGT2B15	AC092198.1
NXPH1	LINC01249
SMOC1	LINC02267
IRF8	AL008721.1
RUFY4	AC133540.1
CD300E	PRKCA-AS1
LHX1	AC025419.1
TBX10	AC083841.2
MYADML2	LINC01098
DEFA4	AL160408.1
MZB1	AC090023.2
CALCA	AC021127.1
PRF1	AL365277.2
ANGPTL3	LINC01345
TRIM72	AC005307.1
CCL25	AL138759.1
LHX5	LINC00392
CHRNA9	AL513304.1
CCR8	AC097347.1
SERPINA9	AL157778.1
ANKRD36C	AC021683.1
CILP	KIZ-AS1
TSPAN32	AC243829.4
ENO3	AC116666.1
SPINK13	AC131532.1
NT5E	AC016687.3
HPGDS	AC016831.5
CDX1	AC010997.3
TET1	AC021546.1
TNFAIP8L2	LINC02170
GFY	LINC02448
MMP9	AC131211.1
BASP1	AC074033.2
CEACAM8	AP003181.1
CCDC154	AC048383.1
ADAMDEC1	AF279873.3
CSAG1	AL357992.1
FAM171A2	AL135787.1
GCKR	VCAN-AS1
MYBPC1	AL590006.1
CASP5	AC007848.2
AKR1C2	AC003985.2
PNPLA5	CASC20
GCGR	AL359851.1
FGF5	GACAT3
UGT2B11	LINC01915
MATR3	LINC00602
DLX5	AL391811.1
AC136428.1	LINC02037
FSIP2	AL356055.1
TRIM17	ST8SIA6-AS1
CLEC6A	AC007389.3
MYBPH	SLC26A4-AS1
SCN4A	AC011444.2
INSL4	Z82173.1
COL9A3	AP005137.2
SOWAHD	AL139125.1
SLCO1B1	AL928742.1
SLC28A2	AC021534.1
AFP	AC069542.1
PPEF1	LINC01981
FANCD2OS	AL110115.1
CGA	AP006333.2
ADGRB1	AL391813.2
IGLL1	AC026790.1
PNMA5	AL121956.1
CDX2	LINC00473
MAGEA3	AC092809.2
LRRTM4	AL160408.4
C16orf54	AC090164.2
SYNPR	AC104051.2
CALCB	AC073578.2
KRT3	LINC02327
GRM4	CASC11
MAS1L	AC100774.1
AC011604.2	AC083806.2
KLK12	AC068985.1
POU6F2	AC006206.1
DNAJC5B	AL445209.1
TMPRSS11D	OVAAL
SLC25A21	LINC01825
COL25A1	AL445531.1
HOXA13	AC127024.3
TLX2	AC097716.1
ADAM32	AC105999.2
CELF3	AC104793.1
ENPP6	LINC00706
SP5	AL049875.1
SLC7A9	AL049775.2
KLHDC7B	AC011287.1
NTRK2	LINC00308
PLK5	AC005237.1
FABP7	AP000851.2
CREG2	AL365356.1
HRG	AL359853.1
ST8SIA2	LINC01727
NLRP11	LINC01079
AGTR2	AC036214.1
SIRPG	LSAMP-AS1
A2ML1	C3orf67-AS1
APOC4-APOC2	LINC01391
COL2A1	AC015923.1
SYT13	AC100782.1
ANKRD18B	GS1-279B7.1
KCNC2	LINC01210
FCGR1B	LINC01812
OLFM4	AC073957.1
PI15	LINC01634
CALY	AL450345.1
SPRR2D	AL121957.1
CD69	AC022031.2
RETNLB	CR392039.3
C1QC	AL512283.1
KRT20	LINC02141
FCRL4	AC012174.1
AC005885.1	AC104958.1
WNT16	AC007431.1
P2RX2	AC104088.1
DLX1	AL035401.1
SCX	AC091868.2
CD163	AP003555.2
CNGB3	CHODL-AS1
PKD2L1	LINC01444
MLLT11	LINC01221
TNFRSF17	AC073525.1
ETNPPL	AC007431.2
CNTNAP4	AC006372.1
SLC13A5	AC010974.1
PAX7	AC087380.1
MAGEA12	MALAT1
PRAC2	AC073115.2
ZMAT4	AC078852.2
RET	AC027514.1
INSRR	AL121652.1
DMRT1	AC243773.1
MAGEA10	AL357060.2
NEB	FOXP1-IT1
CAMK2B	AP000688.2
FAM196A	E2F3-IT1
APOBEC3A	AC005722.2
MST1	LINC02000
LIN28B	AC116021.1
ONECUT3	LINC01502
ALX3	AC069061.2
SLCO1B7	AC073115.1
ITIH6	AP001025.3
DMP1	AL138974.1
SLC14A2	AC105760.1
SLC18A3	AC105460.1
LIN28A	GRM7-AS3
F7	AC112495.1
AMBP	AL669970.3
NPTX2	LINC01691
BTNL8	AC092325.1
SLC22A8	LINC02422
KCNU1	ASH1L-IT1
DSG4	AC097065.2
RGS18	AL589765.1
INSM1	AC011287.2
FAM180A	LINC01250
CGB5	NAALADL2-AS3
C18orf63	LCMT1-AS2
MDFI	AC004832.4
CA6	AC073530.1
CDH18	LINC01090
COL11A2	PAQR9-AS1
IL27	FLJ36000
SLC38A8	LINC01854
MYPN	AC020551.1
CRTAM	AL451047.1
TFF3	LINC01411
C1QL4	AC099673.1
MAP1LC3C	AC074389.2
FAM83F	AL391097.1
B4GALNT2	AC091133.2
GALR2	MYHAS
SP9	LINC01959
PSG1	AC007529.1
PHOX2B	AL583785.1
PPBP	AC148477.4
TAC3	AC132807.2
WNT7A	AL078645.1
STXBP5L	LINC00540
IL2RA	Z99289.2
TIGIT	AC009884.1
ADAMTS20	AC087612.1
MAGEA9B	AC034229.1
PCDH8	AF178030.1
MMP7	AC005522.2
SLC6A12	AL162718.1
MYCNOS	AC092168.2
C14orf39	AP002833.2
TCF24	AL080314.2
PDE1C	AC092264.1
SPDYA	SCARNA9
GUCY2C	AC093702.1
MYLK3	LINC02294
BRSK2	AL121929.2
TM4SF20	C21orf91-OT1
LHFPL4	AC078950.1
UGT2B28	AC133106.1
ADAM2	AC008060.1
SCG2	AL583808.1
OASL	AC099811.1
CBR1	ZBTB46-AS1
HLA-DOA	AL133343.3
DSG3	AP000842.2
CA5A	AC092535.3
CD27	AC093585.1
PDCL2	AL162584.1
DSCR8	AC002511.2
TNFRSF9	AL008638.2
HMP19	AC005858.1
CLEC4D	LINC02411
ASCL1	BIRC6-AS2
AC008878.3	AC107909.2
NR0B1	AL031767.1
ZBP1	AC100800.1
COL9A1	IGF2-AS
RBM46	PLCB1-IT1
EIF4E1B	AC139792.1
PROKR1	LINC02078
DLK1	DANT2
REG1A	AC008592.5
VAX1	CYP4F26P
ST18	AL356311.1
SLCO6A1	AC008456.1
PRB4	AC096721.1
UBD	LINC01433
DLX2	MACC1-AS1
CFHR4	AC096577.1
OR4C6	LINC02348
SLC5A12	LINC01693
MIA	AP000997.2
SPDYC	AC004080.2
OBP2A	AL359095.1
OCLM	LINC01450
HLA-DRB5	LINC02385
POU5F2	AC019183.1
PSG3	MIR7-3HG
SLC35F4	LINC01665
KLK8	AC034223.1
BPIFB2	AC114284.1
C17orf78	FSIP2-AS1
BHMT	AC007993.2
KCNN1	MIR2117HG
CD177	AF130417.1
BOLL	LINC02470
SUMO4	AC010486.3
LAG3	AC063965.1
OFCC1	AC068535.1
OTOS	AL136115.2
ASIC5	PCAT18
DSPP	AC087273.2
MAEL	AC037198.2
OTX2	LINC00879
INHBE	AC093730.1
PAGE2	AC139722.1
TMEM179	AC104984.2
PATE4	AP000757.1
PRSS56	AC005920.4
DCAF4L2	LINC00867
TMEFF1	CYMP-AS1
ACSM5	LINC01448
PRR4	LINC01554
CHAT	AC009135.1
DKK4	AL033504.1
GALNT13	LINC02443
FGA	AL391863.2
MSTN	LINC00158
SLC26A3	AC002401.4
FGF21	AC104232.2
CNMD	FP236383.1
HEPACAM2	GPC5-AS1
VCX3A	AC015909.3
PSG4	AC109439.2
CSAG2	AL133372.2
TMEM78	LINC01886
FGF20	AC003958.2
GABRR1	AC009754.1
NKX6-1	AC107393.2
WDR72	AC093001.1
GDPD2	AC022173.1
ADAMTS18	EPHA5-AS1
TAS2R38	AC011483.2
DDX53	AL121772.2
PI3	AP005432.1
VIT	LINC01593
GCG	PLCH1-AS2
ERVMER34-1	C10orf126
PYDC1	AC010145.1
CGB3	AL355336.1
SLC30A10	AC063926.1
LIPI	AC004053.1
CSAG3	AC091151.1
NKG7	AC010978.1
FOXG1	AC005828.2
PAGE5	AP005131.6
UNC13C	ANO1-AS2
SIM2	AL359094.1
SLC2A2	LINC01781
DSCR4	AC079915.1
HIST1H2BA	LINC02458
LRRC38	AC046158.1
GAGE2A	LINC01695
GRIA4	LINC02307
NAA11	AC017006.2
SST	AP005482.1
NLRP7	AL022097.1
ZIC3	AL390964.1
CLGN	AC131182.1
AMER2	LINC01788
CHRNG	DPYD-AS2
MYBPC2	LINC01055
NEUROD1	ST7-AS2
SIGLEC6	AC092801.1
ZNF732	AC016027.2
SLAMF7	AC022540.1
PRDM7	AC023034.1
ZIC1	AC108206.1
GALR3	AL161668.1
TTC24	STARD13-AS
IFITM5	AC107398.3
AC093893.1	TCEAL3-AS1
CYP2B6	AP003025.2
MUC17	AL360091.3
RRAD	AL162408.1
ZIC4	AC037487.2
KCNJ13	LINC02446
SLC38A4	AL358216.1
CTLA4	AC092794.2
OR1F1	LINC01087
NKX2-5	AC007368.1
FSTL5	AC007001.1
GNRH2	AC025211.1
SSTR5	LINC01940
FBN2	PART1
ELOA2	AC004672.1
CCL18	AL354726.1
APOB	AC007494.2
ATOH1	LINC00840
SCML2	AL359694.2
TTR	LINC01819
SPINT4	AF127577.2
CYP4F3	LINC01163
ACTN3	AL589986.2
P2RY12	AC005828.1
PSG11	DIO2-AS1
TRPV1	AC068389.4
NEFL	AL109923.1
MKRN3	LINC01362
PLA1A	AL137230.1
GABRG3	MTOR-AS1
AC013394.1	AC106053.1
MET	LINC00494
AC022335.1	AC103853.1
KLK14	AC000061.1
PAGE2B	LINC01976
AC092821.1	LINC02312
SCN5A	AC108515.1
EDARADD	AC008277.1
FAM159B	CACNA1C-IT3
EDDM3A	AC083806.3
KRT72	AC073651.1
ATP6V0A4	AC021683.3
OR10G2	LINC02310
FAM186A	AL360004.1
LRRC26	AP001803.2
RFX6	SMCR5
KRT31	LINC00488
PVRIG	B3GALT5-AS1
CCL7	CLYBL-AS2
LYZ	AL021395.1
TRIM48	AC245128.1
EDN2	AC239800.2
REC114	AC010609.1
TUBA3E	ZBTB20-AS5
2020-09-14	LINC01425
DEFA5	DANT1
KCNJ18	AC078852.1
EREG	LINC01878
NLRP5	AC008937.2
FAM163A	ASTN2-AS1
GNRHR	AC099811.4
LCN15	AC008517.1
ALX1	AC012462.1
SSX1	AC111000.4
KIF19	AL022323.3
PCDHA5	AC113146.1
MUCL1	AC011933.2
STUM	MIR670HG
CD79A	AL356752.1
OR10AD1	DSCR10
GPR22	AP000924.1
TENM1	AC092800.1
ARHGAP36	AL139120.1
TBR1	AC116096.1
BEST3	AC103409.1
FAM9C	AC010099.4
CHRND	AC007448.2
FMR1NB	AL162734.1
BARHL2	AL391863.1
FRG2	AL391839.1
MAGEB16	AC012363.1
PRB1	AC010857.1
DAZL	AP001442.1
UGT3A1	KC6
TEX37	AC009032.1
C9orf153	AC092574.2
LENEP	LINC01882
NPFFR2	AL360091.2
TAS2R13	MIR124-2HG
PASD1	ITGB5-AS1
GABRR3	AC110921.1
G6PC	AL031770.1
PRR26	Z82217.1
NCR1	AC002511.1
FGF3	AC104982.2
AADAC	AL157402.2
CAPN13	AC009303.2
HCN1	AC007906.1
GAGE1	AL645504.1
DEFB126	MIR3976HG
GPR50	AL031668.1
FTHL17	AC023481.1
PRH2	NAV2-AS3
CBLN1	AL596442.1
KCNK2	AC004817.4
CREB3L3	AC068473.4
IRX4	AC018442.2
FAM196B	AC009686.1
EVX2	AC117834.1
TTC6	AC007533.1
LRRTM1	AC126323.5
C10orf71	PCAT5
CTCFL	AC090772.2
MTMR7	AC110813.1
PSG8	AL022313.4
PCDHA9	AL110292.1
SULT1C3	AC111170.1
PCDHGA8	AC079866.2
TAS2R30	AC027018.1
CARD18	AC007161.1
CD70	AC092447.5
ORM2	AL731563.2
FAM9A	ANKRD62P1-PARP4P3
ANKRD33	LINC01549
GPR52	AC023051.1
OR13H1	AC060834.2
KNG1	AL133492.1
KRT34	PCAT2
RIMBP2	AC124069.1
AL031708.1	OSBPL10-AS1
SLC17A4	Z97652.1
NKX2-3	LNX1-AS1
METTL21C	THOC7-AS1
FNDC9	LINC01845
HTR3B	AC008883.1
PAGE1	AC016716.2
GDAP1L1	PHACTR2-AS1
DCAF8L1	AC011284.1
SPDYE1	AC005757.1
KRT33A	AL365258.1
FAM166A	AC011595.1
ZG16	AC090220.1
DUSP27	AC022239.2
CADM3	LINC01785
S100B	AC113398.2
FAM25A	AC012568.1
ALPI	AP005131.4
INS	ARHGEF3-AS1
CLEC2A	AC020900.1
PRLHR	AC069431.1
MAGEB2	AC010320.4
HPX	AC009646.2
CWH43	AC106873.1
ANKRD36B	AC114763.2
TRIM71	AP000462.2
EN1	LINC01891
CACNG7	AC016909.2
CLLU1OS	LINC02241
TRIM49	AC091946.2
SPIN2A	AC108159.1
PRG4	AC027763.2
SPIC	LPP-AS1
GPC5	AC139769.2
CYP4F8	ATG10-AS1
TEX13B	AL079304.1
MYH1	AL162414.1
RAB40AL	AC023905.1
FGF4	AC068992.1
SERPINA7	AL513412.1
CXCL9	AP001011.1
OLIG3	AC108102.1
BPIFB6	AC009313.1
STAC2	AL034349.1
NKD1	AC006372.3
FER1L6	AC130895.1
MGAM2	AC022960.2
SCG3	AC098868.1
TPSD1	BIRC6-AS1
HOXA9	AC104984.6
CHI3L1	AP000753.2
PLCZ1	AL445223.1
TAS2R20	AC006141.1
C10orf113	AC022898.1
NBPF4	AC114737.1
LINC00371	DLGAP1-AS5
FCER2	AL022323.2
POU3F3	AL049646.1
LGALS13	AL513318.2
WNT1	AC022973.3
NTSR2	AL162293.1
RSPH6A	LINC01475
CFHR5	LINC02125
HHLA1	LINC02008
ODC1	AC022973.2
KLK3	KCNMA1-AS3
HTR2C	AL117341.1
SVOP	AC092839.2
FURIN	EMX2OS
IGDCC3	LINC02050
CXCL13	AC091814.1
CDH12	AC008060.4
ATCAY	AC068025.2
ANKRD36	AC104041.1
INSL6	AC012370.1
CDR1	AC104791.1
RPE65	AC009656.1
STMN2	AL513188.1
PCDHA8	LINC01603
EMX2	AL138930.1
UPK2	AC008781.2
KLK13	AC090589.2
NPY	LINC01901
BANF2	LINC01158
NLRP13	AL121759.1
CCL1	AL079343.1
LUZP4	AC099811.5
HRH3	AC104984.3
HBE1	AL020995.1
TLR10	AC131391.1
ASB11	AC073569.1
TAT	NLGN1-AS1
PCDH10	AC023034.2
GSG1L2	C1orf195
GOLGA6L7P	AC016576.1
HDGFL1	U51244.1
UCN3	AC037441.2
TNNT3	AL807761.4
TPH2	AL121900.1
GJA10	NFIA-AS1
CLEC2L	AL139002.1
OR1J4	AL391421.1
2020-03-11	AC096741.2
PCSK2	AC144521.1
HAO1	AL133260.2
ESX1	AL137789.1
ENTHD1	AL513323.1
ZNF729	AL390774.2
C8A	AC104137.1
SOX1	AP001783.1
SSX3	AP000769.3
HAP1	AP003696.1
AP003419.2	LINC00517
AMER3	AC090518.1
CLCNKA	AC016866.2
OR1J1	AC100763.1
BRINP2	AC009365.2
PDZRN4	RASA2-IT1
KLK15	AC087241.4
CDC20B	ARHGAP26-IT1
UTS2R	AC104365.1
IL17A	AL450344.2
KCNT1	AL591623.1
CCKAR	AC103770.1
CRHR2	LINC02254
TAC1	AP000919.3
MDGA2	DOCK4-AS1
IFNG	AC090116.1
DGKB	AP005131.1
ADH4	AC025040.1
KRTAP29-1	AL807757.1
CCL26	AP000345.2
UGT2A3	AC007673.1
CRCT1	AC105150.1
TAS2R46	AP000462.1
SLC12A3	AC004593.1
SLPI	HECW1-IT1
FZD10	AC079209.2
ADAM7	AC099313.1
ANKRD30BL	AP000897.1
ITLN1	AC019118.1
PDC	MPRIP-AS1
GALNTL6	AP001042.1
SLC15A5	AC104435.2
NXPE1	AC087620.1
CD19	AP003467.1
KNCN	AL359880.1
ZNF80	AL133480.1
AC087632.1	LINC01838
BLID	AC016493.1
FCAR	SLC9A9-AS1
TSPY1	AC078962.3
DDC	AC064874.1
NEUROG3	AP001970.1
VTN	GPC6-AS1
RNF113B	AC016642.1
BAMBI	AL035634.1
HTR6	SND1-IT1
GPR26	AP005131.3
KLB	AC138058.1
OR4A16	AC096947.1
FBN3	LARS2-AS1
CLCA4	LINC01567
GAGE12J	Z98749.1
HAMP	AF107885.2
AATK-AS1	AC110792.3
PAX2	AC027228.1
MEI4	SMAD1-AS2
DUOXA2	ATP11A-AS1
PNMA6F	AC090802.1
NEURL1	Z99127.1
NLRP8	AC013652.2
SPACA3	AC073575.1
OTOGL	LINC01606
ANXA13	AC116348.2
AC020914.1	RC3H1-IT1
TMPRSS11F	CACNA1C-AS4
SHISA9	AC002558.2
TRH	AP000679.1
IFNK	AC012404.1
CTNNA2	PCA3
C1orf64	DLGAP1-AS3
MYL2	AC092332.1
ADGRF2	AC010969.1
HHATL	AL360169.2
ZP2	AC009054.1
NBPF6	AIRN
PRSS48	AC013437.1
TRPC5	AL135838.1
BTNL3	AL606534.2
PRODH2	AL136984.1
AMBN	AL358333.2
BMX	MAGI1-AS1
SPRR2F	AC104316.1
NDST4	AC087498.2
PNLIPRP1	LINC02030
TLX3	ZBTB20-AS3
PRORY	AC055733.2
FXYD2	LINC02388
OR8A1	AC021237.1
C6orf10	AC009248.2
REG1B	AL590302.2
TAS2R19	AC016735.1
DCX	C17orf77
TSPY2	STX18-IT1
HSD3B1	AL589863.1
ZNF460	AL136320.1
CT47B1	AL158801.3
KLRC2	AC022537.1
CTAGE9	GPC6-AS2
LRRD1	AC022274.1
WFDC5	AP006259.1
KCTD4	AL356805.1
C12orf40	AC093849.1
UGT2B4	AC006372.2
CTXN3	AC009303.3
TAS2R50	AC007614.4
TMEM72	AC019270.1
CASP14	USP12-AS1
TSPY3	AC024475.1
TMEM196	MIR133A1HG
KRTDAP	DLEU1-AS1
ZNF492	BX119904.2
SLC25A2	AC069079.1
PRSS38	FAM41C
KRT37	AL162253.1
TMEM244	AC021517.1
ZBTB20	LINC02042
ALDH3A1	FBXW7-AS1
UNC5D	AC126175.1
PLA2G2D	Z84468.1
CCL19	AC011939.2
SLC7A14	AC008395.1
TSPYL6	AC025031.3
SMIM18	AC011120.1
EDDM3B	BACH1-IT3
GABRB1	AC092868.2
LINC00238	LINC01413
SERPINB13	AC007599.2
GAL3ST3	AC008700.1
UPK1B	LINC02316
SELENOV	COL18A1-AS2
LGALS14	AC022778.1
TAAR1	AC018607.1
KCNB1	Z93022.1
CCDC83	PAPPA-AS2
PRB2	AL096772.1
ADAMTS19	AC026894.1
TFAP2B	AC006058.3
TRIM43	AC106798.1
OPTC	LINC02287
OR2H2	RAI1-AS1
AKAIN1	AL137071.1
TXNDC2	AC012103.1
LTF	AC078860.1
LRP1B	AC064852.1
GLRA4	AC013549.2
TAS2R31	AL031428.1
AC011473.4	AP003086.3
IL21	AC013286.1
NEFM	AP003108.1
TNMD	AC096558.2
GP2	AC110760.1
CRISP1	AL049637.1
NPIPB8	AC008883.2
OR9A4	AL662889.1
UCP1	BRWD1-IT1
EPHA5	AC118555.1
GKN1	AC012123.1
C19orf67	FOXN3-AS2
SLC5A7	AP003110.1
LINC00890	LINC01320
DSG1	AC009269.3
DPPA5	AP006248.4
TUNAR	DOCK9-AS1
ANHX	ALG9-IT1
ALLC	AC087286.1
SORCS3	SHANK2-AS3
SPRR2G	AL353771.1
AC002429.2	LINC01102
FEV	AC044781.1
SPRR2E	AL359873.1
PYY	AL606537.1
ASIC2	LINC00454
C10orf99	AL024474.2
SLC3A1	AL355112.1
OR1Q1	AC087257.1
KCNV2	SMYD3-IT1
GABRA4	AL078599.2
FSHB	AC023490.3
IZUMO2	AC005344.1
2020-03-04	AC092608.1
FXYD4	AC112196.1
RHOXF2B	AC005920.2
PANX3	AC114401.1
KIR3DX1	AF131215.2
RTP1	LINC01198
SNAP25	LINC01602
RAD21L1	MAST4-IT1
QRFPR	AC011753.2
ZNF99	AC007601.2
CXorf67	AL161644.1
GNAT3	AC068756.1
AC006978.2	AC136424.2
DEFA6	AP003168.2
DEFB4B	AC104462.2
FAM135B
C1orf94
ZDHHC22
SPOCK3
KPRP
ODF3
CCDC144NL
CLCA1
PEX5L
PAQR9
HTR4
PABPC1L2A
LEFTY1
SLC7A2
PRAC1
SPATA31E1
TAS2R3
REG3A
VSX2
NTNG2
ZFP42
SBK2
SNTG1
ZAN
SPINK9
KIAA1210
AC010255.3
C10orf82
VWA5B2
ZNF676
MPC1L
TMIGD1
DUOX2
KRTAP5-7
LGALS7
GBP6
CDH22
ADAM20
AC004233.2
ATP2B2
SI
GK3P
KCNJ9
PRSS37
TAS2R43
NOTUM
ZNF98
GUCA2A
PGC
PIRT
SEZ6L
PNMA6E
ST8SIA3
CYP4F2
VWC2L
AMY1B
RGSL1
MEP1B
MSMB
SPRR2B
MMP26
TKTL1
PBOV1
GUCA2B
KCNK16
CDH16
CLRN1
HMX3
EFCAB3
RBP3
AMELX
GDF6
A4GNT
CRYGD
GALR1
GIF
MYT1L
PPY
TAS2R60
GPR142
LMX1A
REG3G
MAB21L2
KRT76
