# Supplementary material for: Identification of prognostic candidate signatures by systematically revealing transcriptome characteristics in lung adenocarcinoma with differing tumor microenvironment immune phenotypes
Source: Aging (Albany NY). 2022 Jun 7;14(11):4786–818. doi: 10.18632/aging.204112 (PMC9217709; doi:10.18632/aging.204112)
Supplement: Supplementary Table 4 [file aging-14-204112-s004.xlsx]

## Sheet: Table S4
Supplementary Table 4. KEGG pathways enriched by 80 upregulated immune DEGs.
#term ID	term description	observed gene count	background gene count	strength	false discovery rate	matching proteins in your network (IDs)	matching proteins in your network (labels)
hsa04060	Cytokine-cytokine receptor interaction	23	282	1.3	1.11e-20	9606.ENSP00000053243,9606.ENSP00000225831,9606.ENSP00000225842,9606.ENSP00000229135,9606.ENSP00000233954,9606.ENSP00000245903,9606.ENSP00000264497,9606.ENSP00000266557,9606.ENSP00000286758,9606.ENSP00000306157,9606.ENSP00000308815,9606.ENSP00000326432,9606.ENSP00000344192,9606.ENSP00000349365,9606.ENSP00000351059,9606.ENSP00000354901,9606.ENSP00000367832,9606.ENSP00000369293,9606.ENSP00000375086,…	TNFRSF17,CCL2,CCL1,IFNG,IL1RL1,CD70,IL21,CD27,CXCL13,IL7R,CCL19,CCR8,IL17A,IL27,CX3CR1,CXCL9,CCL7,IL2RA,CCL25,CCL26,IL34,TNFRSF9,CCL18
hsa04061	Viral protein interaction with cytokine and cytokine receptor	13	96	1.52	0.0000000000000878	9606.ENSP00000225831,9606.ENSP00000225842,9606.ENSP00000286758,9606.ENSP00000308815,9606.ENSP00000326432,9606.ENSP00000351059,9606.ENSP00000354901,9606.ENSP00000367832,9606.ENSP00000369293,9606.ENSP00000375086,9606.ENSP00000378365,9606.ENSP00000397863,9606.ENSP00000479955	CCL2,CCL1,CXCL13,CCL19,CCR8,CX3CR1,CXCL9,CCL7,IL2RA,CCL25,CCL26,IL34,CCL18
hsa04062	Chemokine signaling pathway	11	186	1.16	0.00000005	9606.ENSP00000225831,9606.ENSP00000225842,9606.ENSP00000286758,9606.ENSP00000308815,9606.ENSP00000326432,9606.ENSP00000351059,9606.ENSP00000354901,9606.ENSP00000367832,9606.ENSP00000375086,9606.ENSP00000378365,9606.ENSP00000479955	CCL2,CCL1,CXCL13,CCL19,CCR8,CX3CR1,CXCL9,CCL7,CCL25,CCL26,CCL18
hsa05321	Inflammatory bowel disease	7	60	1.46	0.000000853	9606.ENSP00000229135,9606.ENSP00000229829,9606.ENSP00000264497,9606.ENSP00000344192,9606.ENSP00000363089,9606.ENSP00000364114,9606.ENSP00000365380	IFNG,HLA-DOA,IL21,IL17A,TLR4,HLA-DRB5,FOXP3
hsa04940	Type I diabetes mellitus	6	39	1.58	0.00000182	9606.ENSP00000229135,9606.ENSP00000229829,9606.ENSP00000364114,9606.ENSP00000365817,9606.ENSP00000380432,9606.ENSP00000398568	IFNG,HLA-DOA,HLA-DRB5,HLA-E,INS,PRF1
hsa05323	Rheumatoid arthritis	7	85	1.3	0.00000528	9606.ENSP00000225831,9606.ENSP00000229135,9606.ENSP00000229829,9606.ENSP00000303939,9606.ENSP00000344192,9606.ENSP00000363089,9606.ENSP00000364114	CCL2,IFNG,HLA-DOA,CTLA4,IL17A,TLR4,HLA-DRB5
hsa04659	Th17 cell differentiation	7	101	1.23	0.0000137	9606.ENSP00000229135,9606.ENSP00000229829,9606.ENSP00000264497,9606.ENSP00000344192,9606.ENSP00000364114,9606.ENSP00000365380,9606.ENSP00000369293	IFNG,HLA-DOA,IL21,IL17A,HLA-DRB5,FOXP3,IL2RA
hsa05330	Allograft rejection	5	34	1.56	0.0000214	9606.ENSP00000229135,9606.ENSP00000229829,9606.ENSP00000364114,9606.ENSP00000365817,9606.ENSP00000398568	IFNG,HLA-DOA,HLA-DRB5,HLA-E,PRF1
hsa05140	Leishmaniasis	6	70	1.32	0.0000245	9606.ENSP00000229135,9606.ENSP00000229829,9606.ENSP00000356946,9606.ENSP00000363089,9606.ENSP00000364114,9606.ENSP00000367851	IFNG,HLA-DOA,FCGR3A,TLR4,HLA-DRB5,CYBB
hsa05332	Graft-versus-host disease	5	36	1.53	0.0000245	9606.ENSP00000229135,9606.ENSP00000229829,9606.ENSP00000364114,9606.ENSP00000365817,9606.ENSP00000398568	IFNG,HLA-DOA,HLA-DRB5,HLA-E,PRF1
hsa04145	Phagosome	7	142	1.08	0.0000742	9606.ENSP00000229829,9606.ENSP00000347714,9606.ENSP00000356946,9606.ENSP00000363089,9606.ENSP00000364114,9606.ENSP00000365817,9606.ENSP00000367851	HLA-DOA,FCAR,FCGR3A,TLR4,HLA-DRB5,HLA-E,CYBB
hsa05320	Autoimmune thyroid disease	5	48	1.41	0.0000742	9606.ENSP00000229829,9606.ENSP00000303939,9606.ENSP00000364114,9606.ENSP00000365817,9606.ENSP00000398568	HLA-DOA,CTLA4,HLA-DRB5,HLA-E,PRF1
hsa04650	Natural killer cell mediated cytotoxicity	6	121	1.08	0.00034	9606.ENSP00000229135,9606.ENSP00000291890,9606.ENSP00000356946,9606.ENSP00000357012,9606.ENSP00000365817,9606.ENSP00000398568	IFNG,NCR1,FCGR3A,CD244,HLA-E,PRF1
hsa05150	Staphylococcus aureus infection	5	86	1.15	0.00084	9606.ENSP00000229829,9606.ENSP00000347197,9606.ENSP00000347714,9606.ENSP00000356946,9606.ENSP00000364114	HLA-DOA,C5AR1,FCAR,FCGR3A,HLA-DRB5
hsa04672	Intestinal immune network for IgA production	4	43	1.36	0.00089	9606.ENSP00000053243,9606.ENSP00000229829,9606.ENSP00000364114,9606.ENSP00000375086	TNFRSF17,HLA-DOA,HLA-DRB5,CCL25
hsa04640	Hematopoietic cell lineage	5	91	1.13	0.00095	9606.ENSP00000229829,9606.ENSP00000306157,9606.ENSP00000364114,9606.ENSP00000369293,9606.ENSP00000437940	HLA-DOA,IL7R,HLA-DRB5,IL2RA,CD19
hsa04657	IL-17 signaling pathway	5	92	1.12	0.00095	9606.ENSP00000225831,9606.ENSP00000229135,9606.ENSP00000344192,9606.ENSP00000361405,9606.ENSP00000367832	CCL2,IFNG,IL17A,MMP9,CCL7
hsa05322	Systemic lupus erythematosus	5	93	1.12	0.00095	9606.ENSP00000216336,9606.ENSP00000229135,9606.ENSP00000229829,9606.ENSP00000356946,9606.ENSP00000364114	CTSG,IFNG,HLA-DOA,FCGR3A,HLA-DRB5
hsa05164	Influenza A	6	165	0.95	0.0012	9606.ENSP00000225831,9606.ENSP00000229135,9606.ENSP00000229829,9606.ENSP00000343577,9606.ENSP00000363089,9606.ENSP00000364114	CCL2,IFNG,HLA-DOA,TPSAB1,TLR4,HLA-DRB5
hsa05416	Viral myocarditis	4	55	1.25	0.0016	9606.ENSP00000229829,9606.ENSP00000364114,9606.ENSP00000365817,9606.ENSP00000398568	HLA-DOA,HLA-DRB5,HLA-E,PRF1
hsa04612	Antigen processing and presentation	4	63	1.19	0.0026	9606.ENSP00000229135,9606.ENSP00000229829,9606.ENSP00000364114,9606.ENSP00000365817	IFNG,HLA-DOA,HLA-DRB5,HLA-E
hsa05166	Human T-cell leukemia virus 1 infection	6	211	0.84	0.0039	9606.ENSP00000227163,9606.ENSP00000229829,9606.ENSP00000260227,9606.ENSP00000364114,9606.ENSP00000365817,9606.ENSP00000369293	SPI1,HLA-DOA,MMP7,HLA-DRB5,HLA-E,IL2RA
hsa04514	Cell adhesion molecules	5	137	0.95	0.0042	9606.ENSP00000229829,9606.ENSP00000303939,9606.ENSP00000364114,9606.ENSP00000365817,9606.ENSP00000419085	HLA-DOA,CTLA4,HLA-DRB5,HLA-E,TIGIT
hsa04658	Th1 and Th2 cell differentiation	4	87	1.05	0.0073	9606.ENSP00000229135,9606.ENSP00000229829,9606.ENSP00000364114,9606.ENSP00000369293	IFNG,HLA-DOA,HLA-DRB5,IL2RA
hsa04630	JAK-STAT signaling pathway	5	160	0.88	0.0076	9606.ENSP00000229135,9606.ENSP00000264497,9606.ENSP00000296980,9606.ENSP00000306157,9606.ENSP00000369293	IFNG,IL21,IL22RA2,IL7R,IL2RA
hsa05340	Primary immunodeficiency	3	37	1.3	0.0076	9606.ENSP00000221972,9606.ENSP00000306157,9606.ENSP00000437940	CD79A,IL7R,CD19
hsa04151	PI3K-Akt signaling pathway	7	350	0.69	0.0078	9606.ENSP00000226218,9606.ENSP00000244869,9606.ENSP00000306157,9606.ENSP00000363089,9606.ENSP00000369293,9606.ENSP00000380432,9606.ENSP00000437940	VTN,EREG,IL7R,TLR4,IL2RA,INS,CD19
hsa05152	Tuberculosis	5	168	0.86	0.0085	9606.ENSP00000229135,9606.ENSP00000229829,9606.ENSP00000356946,9606.ENSP00000363089,9606.ENSP00000364114	IFNG,HLA-DOA,FCGR3A,TLR4,HLA-DRB5
hsa04621	NOD-like receptor signaling pathway	5	174	0.85	0.0095	9606.ENSP00000225831,9606.ENSP00000304336,9606.ENSP00000357112,9606.ENSP00000363089,9606.ENSP00000367851	CCL2,PYDC1,AIM2,TLR4,CYBB
hsa04066	HIF-1 signaling pathway	4	106	0.97	0.0115	9606.ENSP00000229135,9606.ENSP00000363089,9606.ENSP00000367851,9606.ENSP00000380432	IFNG,TLR4,CYBB,INS
hsa05144	Malaria	3	46	1.2	0.0115	9606.ENSP00000225831,9606.ENSP00000229135,9606.ENSP00000363089	CCL2,IFNG,TLR4
hsa05145	Toxoplasmosis	4	105	0.97	0.0115	9606.ENSP00000229135,9606.ENSP00000229829,9606.ENSP00000363089,9606.ENSP00000364114	IFNG,HLA-DOA,TLR4,HLA-DRB5
hsa04380	Osteoclast differentiation	4	122	0.9	0.0178	9606.ENSP00000227163,9606.ENSP00000229135,9606.ENSP00000305529,9606.ENSP00000356946	SPI1,IFNG,SIRPG,FCGR3A
