# Supplementary material for: Identification of prognostic candidate signatures by systematically revealing transcriptome characteristics in lung adenocarcinoma with differing tumor microenvironment immune phenotypes
Source: Aging (Albany NY). 2022 Jun 7;14(11):4786–818. doi: 10.18632/aging.204112 (PMC9217709; doi:10.18632/aging.204112)
Supplement: Supplementary Table 5 [file aging-14-204112-s005.xlsx]

## Sheet: Sheet1
Supplementary Table 5. The genes included in the blue module.
symbol	moduleColor	GS.type	p.GS.type	MMbrown	p.MMbrown	MMpurple	p.MMpurple	MMgreen	p.MMgreen	MMpink	p.MMpink	MMmidnightblue	p.MMmidnightblue	MMblue	p.MMblue	MMyellow	p.MMyellow	MMblack	p.MMblack	MMcyan	p.MMcyan	MMgrey60	p.MMgrey60	MMtan	p.MMtan	MMgreenyellow	p.MMgreenyellow	MMlightcyan	p.MMlightcyan	MMmagenta	p.MMmagenta	MMred	p.MMred	MMsalmon	p.MMsalmon	MMturquoise	p.MMturquoise	MMgrey	p.MMgrey
STX11	blue	0.480537	1.46338e-29	-0.00444554	0.921969	-0.0410251	0.365821	0.0899756	0.0469712	0.0821037	0.0699646	0.312336	1.67222e-12	0.821067	2.0264e-120	0.554465	1.10895e-40	-0.0612693	0.176605	-0.0143335	0.752122	-0.027286	0.547617	0.0660524	0.145118	-0.0314999	0.48753	-0.0563405	0.21409	-0.0435625	0.336897	-0.0984111	0.0297295	-0.0765853	0.091034	-0.165973	0.000230847	-0.0483298	0.286639
CD101	blue	0.379793	3.42739e-18	0.0324135	0.474987	-0.0152781	0.736374	0.0797841	0.0782765	0.0710027	0.117242	0.065879	0.146179	0.571301	1.26981e-43	0.313712	1.32024e-12	-0.102197	0.0239627	0.0682154	0.132371	0.00829091	0.855045	-0.0312339	0.491215	-0.0265405	0.558616	0.00526115	0.907712	-0.00254737	0.955239	-0.0824335	0.0688439	-0.0886787	0.050252	-0.203937	5.58898e-06	-0.0617483	0.17324
GPD1	blue	0.139128	0.0020662	-0.0495504	0.274627	-0.0652962	0.149788	0.141115	0.00177818	-0.0249076	0.583073	0.115727	0.0105111	0.316988	7.48523e-13	0.386164	8.40089e-19	0.164676	0.000258744	-0.0037147	0.934766	-0.0286031	0.528451	-0.00648216	0.886425	-0.0245728	0.588148	-0.0261254	0.564786	-0.0234777	0.604891	-0.0567518	0.210759	-0.0609233	0.179066	-0.21788	1.17811e-06	-0.0222842	0.623374
MCEMP1	blue	0.129268	0.00423222	-0.0410078	0.366023	-0.0459768	0.310777	0.0635795	0.160815	0.0207185	0.647986	0.0540041	0.233732	0.395227	1.07782e-19	0.313802	1.2999e-12	-0.0395211	0.383672	-0.0142127	0.754144	-0.0462965	0.307421	-0.0122074	0.787938	-0.0264595	0.559817	-0.035995	0.42756	-0.0252826	0.577412	-0.082917	0.0672274	-0.0568293	0.210135	-0.220471	8.72029e-07	-0.0380172	0.402044
CD5L	blue	0.089946	0.047044	0.133147	0.00320973	0.0231658	0.609698	0.0829348	0.0671682	0.0350356	0.439988	0.0694831	0.125313	0.246435	3.48273e-08	0.20416	5.4558e-06	-0.0519284	0.252223	0.0252458	0.577967	-0.0173395	0.702396	-0.00203641	0.964211	-0.0255083	0.574018	-0.0359113	0.428637	-0.00201397	0.964605	-0.0773838	0.0877028	-0.0387042	0.393587	-0.125496	0.00550023	-0.0345745	0.446033
GLIPR2	blue	0.359317	2.5604e-16	-0.0853099	0.059679	-0.0724456	0.10996	0.136854	0.0024479	0.226597	4.21888e-07	0.131977	0.00349169	0.632014	8.81396e-56	0.368224	4.07232e-17	-0.0831409	0.0664892	0.000148439	0.99739	-0.0277535	0.540776	-0.0307428	0.498058	0.0766121	0.0909206	-0.0312403	0.491125	0.109254	0.015755	-0.105791	0.0194099	-0.0532922	0.239963	-0.0612124	0.177008	-0.0267411	0.555646
PNPLA6	blue	0.265077	2.7235e-09	-0.248817	2.54331e-08	-0.112221	0.0131191	0.0527515	0.244773	0.0721127	0.111608	0.0823277	0.0692018	0.453785	3.67381e-26	0.362858	1.2412e-16	-0.00228288	0.959882	-0.00870349	0.847917	-0.0655379	0.148283	-0.00850866	0.851281	-0.0130551	0.7736	-0.0541876	0.232145	-0.0270182	0.551556	-0.012159	0.78876	0.0197474	0.663448	-0.0789753	0.0813564	-0.0315495	0.486844
OVCH1	blue	0.0453572	0.317349	0.262997	3.65565e-09	0.0389667	0.390384	0.103548	0.0221532	-0.0151533	0.738448	0.103766	0.0218724	0.323217	2.49523e-13	0.373258	1.4042e-17	-0.0789054	0.0816272	0.010464	0.817649	-0.0113485	0.80254	-5.5409e-07	0.99999	-0.0195427	0.666726	0.0950277	0.0358522	-0.015929	0.725586	-0.0349428	0.441201	-0.0418266	0.356522	-0.266929	2.091e-09	-0.0424155	0.349785
GIMAP6	blue	0.543632	7.09176e-39	0.0394806	0.384159	0.0284276	0.530986	0.0491683	0.27835	0.189494	2.51366e-05	0.276439	5.21346e-10	0.825523	7.96187e-123	0.570267	1.94685e-43	-0.0653138	0.149678	-0.0424557	0.349328	-0.0896077	0.0478833	-0.0403801	0.373412	-0.0348698	0.442156	-0.0584706	0.197242	-0.0340679	0.452729	-0.0780765	0.0848933	-0.0916798	0.0429348	-0.229789	2.86651e-07	-0.0674482	0.13679
CMTM2	blue	0.0310345	0.493988	0.0864931	0.0562138	0.0336871	0.4578	0.148009	0.00104057	0.0696623	0.124339	0.0398967	0.379165	0.242833	5.56884e-08	0.206867	4.06457e-06	0.0523646	0.248255	0.130228	0.00395482	0.00724791	0.873115	-0.00741671	0.870186	-0.0304136	0.502673	-0.0302103	0.505534	-0.013116	0.772573	-0.036982	0.414991	-0.0646645	0.153777	-0.0604489	0.182481	-0.0385752	0.395166
SIRPB1	blue	0.309846	2.55656e-12	-0.00577792	0.898693	-0.0718934	0.112703	-0.00457706	0.919668	0.129844	0.00406387	0.190708	2.22476e-05	0.639395	1.897e-57	0.457944	1.13767e-26	0.00691526	0.878893	-0.000968712	0.982971	-0.0564858	0.212909	-0.00761985	0.866663	-0.0347773	0.443368	0.0132451	0.770397	-0.0226302	0.617991	-0.0717992	0.113177	-0.0712361	0.116039	-0.17182	0.000136572	-0.0615752	0.17445
GIMAP1	blue	0.55803	2.73031e-41	0.036047	0.426893	-0.0841532	0.0632353	0.122665	0.00666627	0.114408	0.011433	0.241913	6.27052e-08	0.746246	6.15084e-88	0.683364	2.08985e-68	-0.0783968	0.0836187	-0.0565277	0.212569	-0.0789702	0.0813762	-0.0320235	0.480319	-0.059846	0.186891	-0.0690424	0.127733	-0.0432875	0.339959	-0.0836223	0.0649251	-0.0977361	0.0308738	-0.344325	4.97647e-15	-0.0571183	0.207822
NLRC4	blue	0.292701	4.27071e-11	0.292081	4.71265e-11	0.165747	0.00023549	0.0392201	0.387307	0.169387	0.000170269	0.214481	1.73864e-06	0.772446	6.99217e-98	0.421073	2.15446e-22	-0.0895287	0.048081	-0.0283551	0.532034	-0.0882233	0.0514486	-0.0191581	0.672901	-0.0484465	0.285475	-0.0525317	0.246747	-0.0349896	0.440588	-0.113731	0.0119332	-0.0662293	0.144042	-0.212793	2.10441e-06	-0.0502717	0.267693
TRPV2	blue	0.527953	2.2418e-36	-0.113644	0.0119986	-0.0327471	0.470451	0.0246345	0.587212	0.301206	1.08142e-11	0.144587	0.00136154	0.836384	5.47703e-129	0.496653	9.28883e-32	0.033827	0.455933	-0.0349453	0.441168	-0.0975018	0.0312799	-0.0254867	0.574343	-0.0421021	0.353359	-0.0590289	0.192991	-0.0289651	0.523244	-0.071289	0.115768	-0.09448	0.036938	-0.143408	0.00149173	-0.0583951	0.197822
FGR	blue	0.474114	1.02139e-28	-0.0316641	0.485262	-0.0879972	0.0520516	0.0646794	0.153682	0.0938683	0.0381835	0.23295	1.94401e-07	0.809924	1.0974e-114	0.522976	1.31005e-35	0.00666433	0.883255	-0.0372106	0.41211	-0.0691659	0.127051	-0.0255101	0.573991	-0.0378804	0.403741	-0.057516	0.204669	-0.0444841	0.326765	-0.102544	0.0234858	-0.0928442	0.0403483	-0.244983	4.21209e-08	-0.0561282	0.215824
SPN	blue	0.559232	1.6953e-41	0.00801133	0.859882	-0.0802425	0.076573	0.0912951	0.0438194	0.0525366	0.246702	0.123783	0.00618172	0.768309	3.17482e-96	0.486254	2.50748e-30	-0.0386991	0.393649	-0.0662735	0.143774	-0.0872856	0.0539875	-0.0486793	0.283164	-0.0782241	0.0843042	-0.0168845	0.709847	-0.0657013	0.147273	-0.124424	0.00591856	-0.121266	0.00732071	-0.384574	1.19674e-18	-0.0766336	0.0908295
DPEP2	blue	0.371385	2.09133e-17	0.0142631	0.7533	-0.0835882	0.0650347	0.136996	0.00242228	0.033374	0.461992	0.219864	9.36e-07	0.695383	9.54227e-72	0.663232	3.70231e-63	-0.0302717	0.504669	-0.045791	0.312738	-0.0713132	0.115644	0.0437357	0.334978	-0.0302997	0.504275	-0.0546351	0.228306	-0.0369437	0.415474	-0.0819745	0.0704079	-0.0800832	0.0771617	-0.370929	2.30354e-17	-0.0380223	0.401981
STX12	blue	0.192794	1.80019e-05	0.0480699	0.28924	-0.0268573	0.553929	-0.0353322	0.436124	0.0881388	0.0516734	0.0709288	0.117625	0.360563	1.98694e-16	0.259571	5.904e-09	0.0635899	0.160747	0.00483791	0.915107	-0.0920626	0.0420694	-0.0290458	0.522086	-0.104119	0.0214249	-0.070881	0.117873	-0.0454095	0.316792	-0.210876	2.60915e-06	-0.109769	0.0152667	-0.304297	6.49002e-12	-0.0690937	0.127449
AC008763.3	blue	0.150241	0.000870524	-0.0479523	0.290423	-0.0325006	0.473801	0.0683524	0.131594	0.0617518	0.173216	0.0409103	0.367164	0.391047	2.80064e-19	0.294456	3.2286e-11	-0.0422203	0.352009	-0.0448159	0.323166	-0.0553558	0.222219	-0.0198349	0.662049	-0.0406698	0.36999	-0.0390306	0.389607	-0.0282646	0.533345	-0.0809363	0.0740527	-0.0661672	0.144419	-0.213221	2.00531e-06	-0.0451467	0.319604
VSIR	blue	0.480438	1.50832e-29	-0.149098	0.000954082	-0.104545	0.0208939	0.107636	0.0173799	0.246146	3.6177e-08	0.490711	6.19156e-31	0.67701	1.05154e-66	0.538577	4.68852e-38	0.123779	0.00618359	0.0817013	0.0713526	0.0310115	0.494307	0.0801545	0.0768977	-0.0681574	0.132702	-0.0559125	0.217597	-0.0486699	0.283256	-0.117026	0.00966887	-0.0972149	0.0317831	-0.274501	6.94912e-10	0.01299	0.774698
ADGRE3	blue	0.0647471	0.153251	0.224502	5.42024e-07	0.145729	0.00124545	0.027984	0.537417	0.115525	0.0106483	0.074568	0.0999021	0.385448	9.85512e-19	0.241458	6.64908e-08	-0.0435055	0.33753	0.0265311	0.558756	-0.0395202	0.383683	-0.028426	0.531009	-0.02052	0.651134	-0.0389679	0.39037	-0.0266507	0.556983	-0.0627989	0.166027	-0.0598905	0.186563	-0.190946	2.17178e-05	-0.0405645	0.371231
KLF6	blue	0.173974	0.000112074	0.202371	6.61388e-06	0.0113565	0.802404	0.0271172	0.550098	0.186241	3.4742e-05	0.0715857	0.114256	0.337348	1.87681e-14	0.318279	5.97387e-13	0.167711	0.000197842	0.0830177	0.0668945	-0.0358388	0.429569	0.0622439	0.169809	-0.0771041	0.0888582	-0.0392894	0.386468	-0.0279735	0.53757	-0.120352	0.00777891	-0.0851893	0.0600416	-0.0739802	0.102612	-0.0572653	0.206653
AGRP	blue	0.134653	0.00287733	0.0706408	0.119126	0.00869469	0.848069	0.063703	0.160002	0.0611288	0.177602	0.0543396	0.230836	0.387054	6.88684e-19	0.325676	1.60617e-13	0.00272883	0.952054	-0.0627515	0.166348	-0.0702088	0.121406	-0.019839	0.661982	-0.0316148	0.485942	-0.0433029	0.339787	-0.0252813	0.577432	-0.0926953	0.0406716	-0.0779024	0.0855927	-0.290116	6.42603e-11	-0.0208283	0.646248
CD52	blue	0.484271	4.64155e-30	-0.115909	0.0103894	-0.0714459	0.114966	0.0516411	0.25486	0.0270588	0.550958	0.0737567	0.103657	0.655054	3.85383e-61	0.361865	1.52203e-16	-0.0213879	0.637414	-0.030668	0.499104	-0.0708959	0.117795	-0.0388002	0.392414	-0.0366748	0.418879	-0.0630209	0.164532	-0.0576383	0.203706	-0.110449	0.0146418	-0.100525	0.0263784	-0.235643	1.39034e-07	-0.0548563	0.226425
GYPC	blue	0.43239	1.19064e-23	-0.108933	0.0160661	-0.0803665	0.0761177	0.0881139	0.0517397	0.281443	2.45596e-10	0.351931	1.12651e-15	0.620793	2.48209e-53	0.545959	2.94068e-39	-0.0703277	0.120775	-0.0387994	0.392423	-0.0868211	0.0552833	-0.0301318	0.506642	-0.0329678	0.467464	-0.0439404	0.332718	0.114127	0.0116379	-0.0895136	0.0481187	-0.0835774	0.0650698	-0.212783	2.10689e-06	-0.0342652	0.450115
ALDH18A1	blue	-0.20227	6.68553e-06	-0.220039	9.17126e-07	0.0225756	0.61884	-0.189401	2.53738e-05	0.00747488	0.869177	-0.13492	0.00282186	-0.401383	2.5755e-20	-0.264925	2.78295e-09	0.0388583	0.391704	-0.0409621	0.366558	0.0643178	0.156	-0.0234712	0.60499	-0.0632918	0.162722	-0.000810127	0.985758	-0.0428394	0.344986	-0.0440266	0.331769	0.115905	0.0103921	0.248713	2.57864e-08	-0.0393505	0.38573
PRAM1	blue	0.376747	6.63988e-18	-0.0429938	0.343249	-0.103553	0.0221466	0.106657	0.018432	-0.00374535	0.934229	0.173362	0.000118578	0.620297	3.16794e-53	0.521748	2.0156e-35	-0.0313655	0.48939	-0.0756556	0.0950395	-0.0806769	0.0749868	-0.0364473	0.421773	-0.0554953	0.221054	-0.0602601	0.183853	-0.0516377	0.254891	-0.0887227	0.0501377	-0.0983149	0.0298904	-0.330463	6.73322e-14	-0.0325092	0.473683
OLR1	blue	0.232921	1.95111e-07	0.0909414	0.0446463	-0.0397285	0.381179	0.0142624	0.753313	0.118833	0.00859672	0.0657043	0.147254	0.547053	1.93918e-39	0.311901	1.80143e-12	-0.0810624	0.0736019	-0.020764	0.647265	-0.0571852	0.207289	0.524416	7.88442e-36	-0.0506137	0.264447	-0.0442302	0.329536	-0.0437513	0.334805	-0.12854	0.00445425	-0.0644882	0.154905	-0.174685	0.000104934	-0.0661302	0.144644
MARCO	blue	0.254204	1.23395e-08	-0.0547107	0.227662	-0.0315305	0.487106	0.0763853	0.0918841	0.0878673	0.0524007	0.151966	0.000757155	0.602732	1.36521e-49	0.471998	1.92011e-28	-0.00532666	0.906568	-0.0410458	0.365578	-0.0609073	0.17918	0.00237607	0.958246	-0.0410275	0.365792	-0.0409096	0.367173	-0.0205552	0.650576	-0.0968619	0.0324118	-0.0686708	0.129801	-0.203146	6.08585e-06	-0.052406	0.247881
MS4A7	blue	0.290154	6.38768e-11	0.312324	1.67555e-12	0.0897819	0.0474495	0.0487703	0.282264	0.135472	0.00271012	0.215843	1.48878e-06	0.747956	1.50541e-88	0.52604	4.43367e-36	-0.0925891	0.0409035	-0.0212875	0.638996	-0.0798719	0.0779477	-0.0188374	0.678068	-0.0259141	0.567939	-0.0577509	0.202823	-0.0306392	0.499507	-0.0805404	0.0754825	-0.0561551	0.215604	-0.2493	2.38498e-08	-0.0398504	0.379718
ITM2A	blue	0.445655	3.46897e-25	-0.0448866	0.322403	-0.0594333	0.189953	0.085045	0.0604783	0.00168056	0.970461	0.160982	0.000356438	0.535143	1.66143e-37	0.507501	2.63972e-33	-0.0298821	0.510172	-0.0523211	0.248649	-0.08033	0.0762513	-0.0516777	0.254523	-0.052389	0.248034	-0.0669358	0.139803	0.0315748	0.486495	-0.14506	0.0013123	-0.10771	0.0173028	-0.330763	6.3726e-14	-0.0518974	0.252507
OSCAR	blue	0.401563	2.46887e-20	-0.0950239	0.0358598	-0.101199	0.0253802	0.0575884	0.204098	0.157329	0.000486025	0.147752	0.00106204	0.743562	5.47625e-87	0.51051	9.60823e-34	0.0180585	0.690679	-0.0556476	0.219787	-0.0879912	0.0520676	-0.0112907	0.803526	-0.0535078	0.238064	-0.0558026	0.218504	-0.037326	0.410661	-0.103835	0.0217835	-0.0925331	0.041026	-0.263584	3.36536e-09	-0.0520402	0.251202
FLI1	blue	0.418072	4.55984e-22	0.236689	1.21928e-07	-0.0384858	0.396263	0.109573	0.0154513	0.242531	5.7904e-08	0.266448	2.24019e-09	0.698653	1.10155e-72	0.664334	1.95775e-63	-0.0829429	0.0671417	-0.00380663	0.933155	-0.0704237	0.120268	-0.0324031	0.475128	-0.0524838	0.247179	-0.0691358	0.127217	0.18363	4.48689e-05	-0.0985225	0.0295441	-0.0819806	0.0703868	-0.330631	6.52889e-14	-0.0617143	0.173477
ETV4	blue	-0.202086	6.8183e-06	-0.189536	2.50311e-05	-0.0891295	0.0490906	-0.0892125	0.0488793	-0.193135	1.73859e-05	-0.135097	0.00278562	-0.375145	9.37462e-18	-0.216672	1.35378e-06	-0.00709787	0.87572	-0.103717	0.0219353	-0.0614453	0.175363	-0.0940415	0.0378272	-0.00285232	0.949887	-0.0539941	0.233819	0.141476	0.00172988	0.0142733	0.753131	-0.0564944	0.212839	-0.0556052	0.220139	0.0249795	0.581985
FPR2	blue	0.0983435	0.0298425	0.150549	0.000849221	0.200934	7.70971e-06	-0.0287113	0.526892	0.169755	0.000164714	0.0362646	0.424105	0.311684	1.86956e-12	0.0496007	0.27414	-0.0429145	0.34414	0.0577782	0.202609	-0.0218372	0.63036	0.00947138	0.834684	-0.0224312	0.621086	-0.0181996	0.688388	-0.0190973	0.673879	-0.0502954	0.267467	-0.0291595	0.520458	0.0873454	0.0538227	-0.0260212	0.56634
RASGRP4	blue	0.363918	9.97742e-17	-0.0028642	0.949679	-0.0965455	0.0329844	0.0826385	0.0681545	0.196957	1.17181e-05	0.341592	8.40371e-15	0.738593	2.92142e-85	0.565651	1.28726e-42	-0.0785891	0.0828611	-0.0407861	0.368622	-0.0942669	0.037368	-0.0312794	0.490583	-0.0813033	0.0727469	-0.073637	0.10422	-0.0359335	0.428351	-0.160964	0.000356979	-0.108764	0.016232	-0.391174	2.72129e-19	-0.0545628	0.228924
CXCR2	blue	0.0724011	0.110179	0.0510183	0.260643	0.0343096	0.449528	0.0606304	0.181169	0.0941791	0.0375464	0.063564	0.160918	0.29063	5.92687e-11	0.207323	3.86642e-06	0.0080406	0.859375	0.235225	1.465e-07	0.0562231	0.215047	-0.0130693	0.77336	-0.00543567	0.904665	0.111975	0.0133218	-0.0324681	0.474243	-0.0790969	0.0808871	-0.0533799	0.23919	-0.050735	0.263303	-0.050046	0.26985
GLDN	blue	0.100385	0.0265897	0.0782314	0.0842751	-0.00888023	0.844867	0.0356037	0.432605	0.154912	0.000594536	0.0467737	0.302457	0.335913	2.45603e-14	0.237205	1.14263e-07	-0.057202	0.207156	-0.0267313	0.55579	-0.0401429	0.376228	-0.0152463	0.736903	0.022008	0.627687	0.0848716	0.0610066	-0.00120399	0.978836	-0.0173026	0.702999	-0.0705703	0.119496	-0.219545	9.71451e-07	0.020267	0.655157
DNASE2B	blue	0.25939	6.05428e-09	-0.00318023	0.944135	-0.0593295	0.19073	0.0895191	0.048105	-0.00998935	0.825784	0.0704215	0.120279	0.469372	4.17644e-28	0.394136	1.38477e-19	0.208613	3.35446e-06	-0.00338525	0.94054	-0.0321941	0.477983	-0.0160192	0.724095	-0.0273695	0.546393	-0.0374573	0.409016	-0.0378438	0.404196	-0.046469	0.30562	-0.0642665	0.156331	-0.293143	3.98131e-11	-0.0505411	0.265134
RILPL2	blue	0.350735	1.42675e-15	-0.175296	9.91514e-05	-0.145494	0.00126857	0.246993	3.23638e-08	-0.0502137	0.268246	0.10294	0.0229518	0.422634	1.45447e-22	0.408395	4.86097e-21	0.0429433	0.343816	0.0327407	0.470537	0.0449305	0.321928	-0.0347355	0.443917	-0.0935817	0.0387791	-0.0452374	0.318632	-0.0898292	0.0473324	-0.222435	6.92504e-07	-0.119621	0.00816317	-0.435734	4.95454e-24	-0.0815897	0.0717412
SIGLEC11	blue	0.285784	1.26272e-10	-0.0118073	0.794731	0.0503371	0.26707	0.0416017	0.359115	0.0815966	0.0717173	0.132708	0.00331301	0.627836	7.39633e-55	0.321067	3.65644e-13	-0.0952933	0.0353356	-0.0621398	0.170525	-0.0861435	0.0572198	-0.0288597	0.524757	-0.0372921	0.411086	-0.0545068	0.229402	-0.0440381	0.331643	-0.0891827	0.048955	-0.087404	0.0536615	-0.163171	0.000295037	0.0430512	0.342603
PTCRA	blue	0.436056	4.55149e-24	-0.070951	0.11751	-0.083014	0.0669067	0.0762206	0.0925889	0.0236193	0.602714	0.0857174	0.058466	0.682454	3.68468e-68	0.544686	4.7627e-39	-0.0299321	0.509463	-0.0745448	0.100008	-0.0565622	0.21229	-0.0240506	0.596106	0.00588687	0.896794	-0.049251	0.277542	-0.0340447	0.453037	-0.0532545	0.240296	-0.0850442	0.0604808	-0.252909	1.47056e-08	-0.0595395	0.189162
C5AR1	blue	0.300536	1.20683e-11	-0.052923	0.24324	-0.0852613	0.059825	0.0873647	0.0537696	0.265381	2.60823e-09	0.163283	0.000292183	0.649795	7.08207e-60	0.442583	7.97588e-25	-0.0499743	0.270538	-0.0235324	0.604049	-0.0535552	0.237647	0.0186283	0.681445	-0.027168	0.549351	-0.0466544	0.303693	-0.013617	0.764138	-0.0593823	0.190335	-0.057365	0.205862	-0.135871	0.00263188	0.00574924	0.899194
MSR1	blue	0.334774	3.03688e-14	0.0769044	0.0896909	0.0753084	0.0965706	-0.0359313	0.428379	0.298576	1.66162e-11	0.0962535	0.0335203	0.726078	4.4228e-81	0.29572	2.63624e-11	-0.0445618	0.32592	-0.0244321	0.590289	-0.0785491	0.0830185	-0.0148421	0.743629	-0.0305605	0.500611	-0.0502133	0.26825	-0.0292091	0.519748	-0.120935	0.00748397	-0.0719429	0.112456	-0.11874	0.00864912	-0.0322176	0.477661
C1orf162	blue	0.505943	4.43591e-33	0.025986	0.566866	-0.0873631	0.053774	0.0356237	0.432345	0.135296	0.00274539	0.177941	7.73841e-05	0.82642	2.55929e-123	0.451479	6.98694e-26	-0.108893	0.0161051	-0.0133324	0.768926	-0.093056	0.0398923	-0.0427875	0.345572	-0.0675103	0.136428	-0.0752056	0.0970278	-0.0636219	0.160536	-0.14666	0.00115766	-0.114307	0.0115066	-0.254341	1.21126e-08	-0.0403828	0.37338
TMEM184A	blue	-0.188566	2.75846e-05	-0.125129	0.00564038	-0.043314	0.339663	-0.0353946	0.435313	-0.143742	0.00145368	-0.141841	0.00168241	-0.321939	3.13257e-13	-0.254186	1.237e-08	0.0570985	0.20798	-0.022838	0.614767	-0.000221136	0.996112	-0.0292154	0.519659	-0.0471732	0.298342	-0.0455294	0.315515	-0.0630574	0.164287	0.0585357	0.196743	-0.0331622	0.464841	0.130045	0.00400641	0.082041	0.0701793
KRT79	blue	0.122632	0.00668134	-0.0258231	0.5693	-0.0489609	0.280385	0.0580976	0.20012	0.0807642	0.0746714	0.0537774	0.235704	0.301867	9.70003e-12	0.286349	1.15702e-10	0.20031	8.23787e-06	0.0591815	0.19184	0.0104351	0.818144	-0.00410465	0.927935	-0.0201395	0.657187	-0.0156661	0.729937	-0.0077131	0.865047	-0.0569972	0.208789	-0.0457747	0.312911	-0.191943	1.96305e-05	-0.0306193	0.499786
GIMAP7	blue	0.590793	3.01769e-47	-0.0533676	0.239298	-0.0588138	0.194621	0.0671357	0.138622	0.0843702	0.0625551	0.250846	1.94053e-08	0.752186	4.4068e-90	0.51042	9.90472e-34	-0.0641697	0.156957	-0.0541334	0.232613	-0.0790939	0.0808987	-0.0377137	0.405814	-0.0409935	0.36619	-0.0541708	0.23229	-0.0461535	0.30892	-0.0618573	0.172481	-0.0962823	0.0334673	-0.232158	2.14376e-07	-0.0613767	0.175847
MFNG	blue	0.418873	3.73581e-22	-0.121144	0.00738026	-0.111661	0.0135847	0.0462853	0.307539	0.0863908	0.0565067	0.129598	0.00413505	0.572686	7.14946e-44	0.463468	2.33914e-27	-0.0135652	0.765009	-0.0987281	0.0292048	-0.100827	0.0259274	-0.0622144	0.170012	0.0345352	0.446551	-0.0616817	0.173705	-0.0542228	0.231841	0.0882815	0.0512944	-0.116	0.0103292	-0.265018	2.74642e-09	-0.0308367	0.496745
VSIG4	blue	0.334792	3.02714e-14	-0.0584408	0.197471	0.0223224	0.62278	-0.0467855	0.302335	0.188089	2.89271e-05	0.162723	0.000306752	0.745513	1.12007e-87	0.260156	5.44315e-09	-0.0469917	0.300206	-0.0169439	0.708873	-0.0661561	0.144486	-0.0139997	0.757713	-0.0264892	0.559378	-0.0417233	0.357711	-0.0342905	0.44978	-0.106864	0.0182051	-0.0731301	0.106633	-0.0534758	0.238345	-0.023272	0.608058
ACP5	blue	0.383289	1.5906e-18	-0.1322	0.00343614	-0.066011	0.145371	-0.00358901	0.936968	0.0379066	0.403415	0.0826164	0.0682286	0.643075	2.69086e-58	0.453218	4.30485e-26	-0.0182969	0.686809	-0.0512632	0.258358	-0.0353637	0.435715	-0.0275509	0.543735	-0.00632044	0.88924	-0.059875	0.186677	-0.0485123	0.284821	-0.0407939	0.368531	-0.078223	0.0843084	-0.186249	3.47139e-05	-0.0505577	0.264977
HPS5	blue	0.111036	0.0141213	0.219348	9.9393e-07	0.177629	7.96988e-05	-0.00330925	0.941873	0.165194	0.000247232	0.171097	0.000145867	0.389132	4.31853e-19	0.195422	1.37425e-05	-0.0275914	0.543144	0.078882	0.0817177	0.0120821	0.790064	0.301568	1.01894e-11	-0.0130408	0.773842	-0.0190429	0.674755	0.00791493	0.86155	-0.0605249	0.181931	0.0104245	0.818324	0.106906	0.0181592	-0.0305145	0.501255
CXCR1	blue	0.0639259	0.158542	-0.0117794	0.795205	0.00989782	0.827355	0.0714959	0.114712	0.101172	0.0254188	0.0392079	0.387454	0.17926	6.83022e-05	0.174173	0.000110034	0.0528249	0.244116	0.243749	4.94589e-08	0.0376264	0.406903	-0.00618616	0.891578	-0.0349108	0.441619	-0.0308822	0.496109	-0.0255707	0.573082	-0.0543174	0.231027	-0.0430498	0.342619	0.0190252	0.675041	-0.0475769	0.294221
CD300C	blue	0.419726	3.0197e-22	-0.0787493	0.0822342	-0.0310696	0.493499	-0.0120095	0.791297	0.221617	7.6242e-07	0.203242	6.02365e-06	0.817073	2.55218e-118	0.418251	4.36131e-22	-0.0523886	0.248038	-0.0494083	0.276008	-0.0914283	0.0435114	-0.0250505	0.580913	-0.02066	0.648913	-0.0499942	0.270346	-0.0238264	0.599537	-0.115565	0.010621	-0.0908579	0.0448434	-0.184962	3.93952e-05	-0.0644514	0.155141
LGR4	blue	-0.198934	9.52628e-06	0.182007	5.25071e-05	0.07782	0.085925	-0.0731051	0.106753	-0.0529509	0.242992	-0.0562725	0.214644	-0.182946	4.79484e-05	-0.152443	0.000728295	0.248737	2.57039e-08	-0.0339924	0.453732	-0.00499061	0.912438	0.00381696	0.932974	-0.0600279	0.185552	-0.0399664	0.378332	-0.0361573	0.425478	-0.091624	0.0430622	0.104966	0.0203822	0.0922386	0.0416765	-0.0569418	0.209232
ADGRE1	blue	0.246114	3.6325e-08	-0.00555765	0.902536	-0.000162766	0.997138	0.0315811	0.486408	0.0890085	0.0494003	0.115266	0.0108255	0.404742	1.16454e-20	0.230681	2.5704e-07	-0.0318016	0.483367	0.0143351	0.752096	-0.0273401	0.546824	0.0747152	0.0992329	-0.0183133	0.686544	-0.0174039	0.701344	-0.0129553	0.775284	-0.0364338	0.421944	-0.0159034	0.726009	0.0687781	0.129201	-0.0472956	0.297088
IL6	blue	0.128496	0.00446781	0.0121639	0.788676	0.0161436	0.722041	-0.033342	0.462422	0.153141	0.00068789	0.00950062	0.834181	0.156937	0.000502251	0.0863881	0.0565145	-0.0770655	0.0890187	0.0153871	0.734563	-0.0160422	0.723715	0.0866478	0.0557735	-0.0190803	0.674153	-0.0165412	0.715489	-0.00131539	0.976878	-0.0422711	0.35143	0.00176915	0.968905	0.0904257	0.0458755	-0.00781738	0.86324
CD83	blue	0.434452	6.94203e-24	-0.024284	0.592543	-0.0915938	0.0431312	0.0913924	0.0435941	0.0437352	0.334983	0.0722789	0.110783	0.604083	7.30722e-50	0.389933	3.60445e-19	-0.0838126	0.0643153	-0.101783	0.0245416	-0.0734221	0.105238	-0.0414886	0.360424	-0.0531078	0.241596	-0.0630046	0.164641	-0.0309243	0.495523	-0.131502	0.00361234	-0.0921036	0.0419776	-0.346927	3.00752e-15	-0.0381505	0.400395
S1PR4	blue	0.439374	1.88697e-24	-0.166051	0.000229253	-0.0923383	0.0414555	0.0962791	0.0334731	-0.0708655	0.117954	0.0622381	0.169849	0.506649	3.5073e-33	0.419372	3.29862e-22	-0.0503811	0.266652	-0.117327	0.00948209	-0.0814328	0.0722908	-0.069197	0.12688	-0.0781935	0.084426	-0.0879836	0.0520881	-0.100827	0.0259265	-0.125505	0.00549704	-0.130038	0.00400858	-0.345118	4.2707e-15	-0.060772	0.18015
MMP19	blue	0.16625	0.000225261	0.0833312	0.0658673	-0.0638737	0.158883	0.134451	0.00292005	0.172017	0.000134138	0.167017	0.000210456	0.411568	2.25623e-21	0.431171	1.63521e-23	-0.0791815	0.0805618	-0.0295816	0.514436	-0.0366389	0.419335	-0.0136435	0.763693	-0.0355484	0.43332	-0.0330717	0.46606	-0.00271564	0.952286	-0.0503543	0.266906	-0.0453136	0.317816	-0.212823	2.09731e-06	-0.0229674	0.612764
EFNA3	blue	-0.173152	0.000120883	-0.173034	0.0001222	-0.0689844	0.128054	-0.127781	0.00469658	-0.0805971	0.0752763	-0.119967	0.00797897	-0.273356	8.22736e-10	-0.246163	3.60947e-08	0.0414094	0.361343	0.0689417	0.128291	0.0042696	0.925048	-0.0151246	0.738927	0.0544472	0.229913	-0.00367642	0.935437	-0.0322827	0.476772	-0.0143283	0.75221	0.0481649	0.288288	0.18297	4.78384e-05	0.0109604	0.809161
ALOX5	blue	0.4039	1.42192e-20	-0.0289187	0.52391	-0.034385	0.448531	0.0366195	0.419581	0.164345	0.000266343	0.105295	0.0199898	0.704197	2.64649e-74	0.371582	2.0058e-17	0.10068	0.0261455	-0.0234883	0.604727	-0.0790398	0.081107	0.0732233	0.106186	-0.0491834	0.278202	-0.0597096	0.187899	-0.057624	0.203819	-0.149547	0.000920462	-0.0364094	0.422256	-0.253582	1.34255e-08	-0.0690224	0.127843
DOK2	blue	0.5395	3.32877e-38	-0.12517	0.00562458	-0.0746726	0.099426	0.0301693	0.506112	0.14851	0.000999905	0.186765	3.29898e-05	0.872788	1.70563e-153	0.438597	2.32113e-24	-0.0777858	0.0860635	-0.0716702	0.113828	-0.0991983	0.028441	-0.0435766	0.33674	-0.050861	0.262117	-0.0685507	0.130475	-0.0481126	0.288812	-0.113783	0.0118942	-0.106731	0.0183514	-0.216052	1.45357e-06	-0.0579159	0.201533
CCL23	blue	0.289269	7.33986e-11	-0.0621375	0.170541	-0.0368793	0.416289	0.101168	0.025425	0.0673492	0.137368	0.167707	0.000197918	0.606181	2.75003e-50	0.416415	6.87498e-22	-0.0585388	0.196719	0.00753623	0.868113	-0.0644166	0.155364	-0.0171855	0.704915	-0.0464673	0.305638	-0.0519878	0.25168	-0.0253321	0.576668	-0.112883	0.0125867	-0.077469	0.0873535	-0.206523	4.22028e-06	-0.0612371	0.176833
GPBAR1	blue	0.256504	9.016e-09	-0.0919282	0.0423715	-0.105159	0.0201504	0.0454612	0.31624	0.0546565	0.228124	0.303299	7.65884e-12	0.501199	2.12147e-32	0.33754	1.81016e-14	0.120275	0.00781852	-0.0509359	0.261414	-0.0753041	0.0965899	-0.0260287	0.566228	-0.021862	0.629972	-0.0363152	0.423459	-0.0307076	0.498549	0.113444	0.0121506	-0.087292	0.0539699	-0.187773	2.98527e-05	-0.0392625	0.386794
IL7R	blue	0.393089	1.75967e-19	0.320581	3.98452e-13	0.0543303	0.230916	0.0592887	0.191035	0.317163	7.26017e-13	0.127629	0.00474676	0.633342	4.45198e-56	0.440693	1.32608e-24	-0.118528	0.00876968	0.00529968	0.907039	-0.0431768	0.341196	-0.0143176	0.752388	-0.0570151	0.208646	-0.0528449	0.243937	-0.0172368	0.704075	-0.105687	0.0195296	-0.0756722	0.0949665	-0.201187	7.50478e-06	-0.044938	0.321848
HLA-E	blue	0.587252	1.43301e-46	-0.194505	1.51072e-05	-0.13398	0.00302192	0.0486108	0.283842	-0.00428538	0.924772	0.123962	0.00610709	0.594047	7.0838e-48	0.351292	1.27835e-15	0.108964	0.0160356	-0.00410765	0.927883	-0.0976824	0.0309664	0.00500149	0.912248	-0.0765332	0.0912549	-0.0870567	0.054623	-0.104748	0.0206464	-0.147186	0.00111062	-0.159586	0.000401599	-0.319079	5.19148e-13	-0.0847525	0.0613713
IQANK1	blue	-0.179051	6.96687e-05	-0.0819492	0.070495	0.0126154	0.781027	-0.0690345	0.127777	-0.225737	4.67749e-07	-0.15338	0.000674538	-0.395552	1.00015e-19	-0.269924	1.35802e-09	-0.00484097	0.915053	0.0472152	0.297911	0.0568672	0.20983	0.0335205	0.460029	-0.0715362	0.114507	-0.0253909	0.575784	-0.118775	0.00862931	-0.00966806	0.831302	-0.0386793	0.393891	0.168064	0.000191712	0.117836	0.00917422
MT1M	blue	0.129229	0.00424398	-0.0614639	0.175232	-0.0186112	0.68172	0.017782	0.695176	0.0465793	0.304473	0.0112305	0.804551	0.109168	0.015838	0.0307089	0.498532	-0.00832605	0.854437	0.0513884	0.257196	-0.00257202	0.954806	0.0436168	0.336294	-0.0266874	0.556441	-0.0171996	0.704684	-0.0256211	0.572325	-0.0613687	0.175903	-0.0330248	0.466694	0.0830802	0.0666889	-0.00394232	0.930778
SLC11A1	blue	0.151868	0.00076317	0.0460778	0.309714	0.00613154	0.89253	0.0590074	0.193153	0.146063	0.00121328	0.08099	0.0738605	0.505512	5.11931e-33	0.410278	3.08604e-21	-0.0866409	0.0557928	-0.0558117	0.218428	-0.0793697	0.0798425	-0.00822332	0.856214	-0.0427107	0.346439	-0.0524788	0.247224	-0.0345977	0.445728	-0.0854289	0.0593225	-0.0685011	0.130755	-0.158288	0.000448309	0.0033297	0.941514
FFAR4	blue	0.0988295	0.0290386	-0.0261763	0.564028	-0.0307691	0.49769	0.0276325	0.542542	0.0262638	0.562725	0.0573806	0.205738	0.320989	3.70751e-13	0.251404	1.80073e-08	0.0597984	0.187242	-0.0431525	0.341468	-0.0426779	0.34681	-0.0232044	0.609102	-0.00209069	0.963257	-0.0326861	0.471279	-0.0129977	0.774569	0.275243	6.22682e-10	-0.0319981	0.480667	-0.111673	0.0135741	-0.0221755	0.625071
PHKA1	blue	-0.224029	5.73411e-07	-0.0548889	0.226149	-0.00311785	0.945229	-0.139104	0.00206993	-0.0764246	0.0917163	-0.116525	0.00998657	-0.325385	1.69248e-13	-0.255856	9.85242e-09	-0.0332963	0.463036	-0.0446271	0.32521	0.0371216	0.413231	-0.0187665	0.679211	-0.0541597	0.232386	-0.0546261	0.228383	-0.0628322	0.165802	-0.00886919	0.845058	0.0643501	0.155793	0.254892	1.12381e-08	-0.00167904	0.970488
MAP3K3	blue	0.311929	1.79297e-12	-0.0156269	0.730587	-0.0921607	0.0418502	0.139384	0.0020268	0.185909	3.58987e-05	0.265887	2.42694e-09	0.511878	6.04858e-34	0.551694	3.25985e-40	-0.173771	0.000114193	-0.0957455	0.0344707	-0.12622	0.00523327	-0.0908347	0.0448982	-0.0988518	0.0290021	-0.0807719	0.0746437	0.147684	0.00106775	-0.130609	0.00384946	-0.109052	0.0159498	-0.451118	7.72412e-26	-0.0154971	0.732738
FRMD4A	blue	0.183092	4.7276e-05	0.332672	4.48416e-14	0.0270468	0.551135	0.066148	0.144535	0.305388	5.41271e-12	0.198075	1.04263e-05	0.514507	2.4713e-34	0.428746	3.06111e-23	-0.117854	0.00916359	0.0872841	0.0539918	0.167193	0.000207184	0.104211	0.0213093	0.0166919	0.71301	0.156622	0.000515706	0.122137	0.00690719	-0.0144354	0.750419	0.00502094	0.911908	-0.0375401	0.407981	-0.045291	0.318057
PLPP2	blue	-0.156401	0.000525314	-0.24419	4.67027e-08	-0.0467708	0.302487	-0.0182013	0.68836	-0.182012	5.24794e-05	-0.154248	0.000628049	-0.341358	8.78739e-15	-0.287005	1.04497e-10	0.145388	0.00127917	-0.0161628	0.721724	0.00208445	0.963367	-0.090927	0.0446802	0.105843	0.0193501	-0.0319835	0.480868	-0.078613	0.0827674	0.132521	0.00335777	-0.075617	0.0952087	0.120574	0.00766519	0.0306114	0.499897
JAML	blue	0.479341	2.10794e-29	0.180458	6.09259e-05	-0.0316868	0.48495	0.117903	0.00913467	0.0844417	0.0623324	0.217539	1.22542e-06	0.791119	8.02146e-106	0.491501	4.82163e-31	-0.0799403	0.0776926	-0.0358191	0.429824	-0.082849	0.0674527	-0.0501062	0.269274	-0.0802227	0.076646	-0.0822818	0.0693577	-0.0674071	0.13703	-0.141	0.00179372	-0.132242	0.00342592	-0.41984	2.93416e-22	-0.07553	0.0955909
FOLR3	blue	0.0915577	0.0432139	-0.040091	0.376846	-0.0224813	0.620305	0.0137739	0.761502	0.0242789	0.59262	0.0166257	0.714099	0.120729	0.00758708	0.131085	0.00372141	0.0075553	0.867782	0.0167636	0.711832	-0.0039595	0.930477	0.022828	0.614923	-0.0169101	0.709427	-0.0194444	0.668301	-0.0224903	0.620165	-0.0461419	0.309041	-0.01074	0.812926	-0.0525312	0.246751	-0.0208367	0.646115
MRC1	blue	0.25597	9.70056e-09	0.155316	0.000574945	0.115578	0.0106123	0.00934601	0.836842	0.240997	7.054e-08	0.130303	0.0039339	0.691649	1.08397e-70	0.353176	8.80105e-16	-0.0599214	0.186335	-0.0201984	0.656249	-0.0850102	0.0605841	-0.0250981	0.580194	-0.0582671	0.198809	-0.0536668	0.23667	-0.0260891	0.565327	-0.114429	0.0114177	-0.083995	0.0637351	-0.203956	5.57719e-06	-0.0512101	0.258852
NCF2	blue	0.375349	8.9738e-18	-0.0322742	0.476888	0.0142214	0.753999	-0.0127626	0.778539	0.289055	7.59004e-11	0.113528	0.0120869	0.763061	3.5882e-94	0.320648	3.9377e-13	-0.0498111	0.272107	0.0908	0.0449805	-0.0612782	0.176542	-0.00431881	0.924187	-0.0606391	0.181106	-0.0638209	0.159229	-0.0363654	0.422818	-0.132806	0.00328975	-0.100853	0.0258886	-0.108739	0.016257	-0.0241182	0.595072
MSTO1	blue	-0.12319	0.00643472	-0.170647	0.000151949	-0.0459297	0.311274	-0.110396	0.0146901	-0.183388	4.59368e-05	-0.112768	0.0126782	-0.288819	7.87617e-11	-0.22231	7.0274e-07	-0.0521776	0.249951	-0.0535561	0.23764	-0.0331495	0.465011	-0.00892867	0.844032	-0.0411794	0.364018	0.00732795	0.871726	-0.0352636	0.437016	-0.0202818	0.654921	0.0326547	0.471705	0.0652473	0.150095	0.00476474	0.916386
RETN	blue	0.0793725	0.0798318	-0.0615334	0.174744	-0.0457422	0.313256	0.018135	0.689435	-0.000153356	0.997304	0.0258834	0.568398	0.245519	3.92734e-08	0.188875	2.67456e-05	-0.0558541	0.218078	-0.0459149	0.31143	-0.0491896	0.278142	-0.0265002	0.559214	-0.0286206	0.528199	-0.0354213	0.434967	-0.0256563	0.571798	-0.0549645	0.22551	-0.0504006	0.266467	-0.167882	0.000194855	-0.0254156	0.575411
EPN3	blue	-0.232449	2.06812e-07	-0.220145	9.05778e-07	-0.0581248	0.19991	-0.0838433	0.0642173	-0.173373	0.000118451	-0.125226	0.00560294	-0.380231	3.1142e-18	-0.270158	1.31267e-09	0.160392	0.000374918	0.155404	0.000570776	0.198687	9.77707e-06	-0.000255061	0.995516	-0.0371228	0.413216	0.00125734	0.977898	-0.0787941	0.0820595	0.00922575	0.838912	0.0362117	0.424782	0.242746	5.63229e-08	0.0624009	0.168732
GPT2	blue	-0.220978	8.21741e-07	-0.113157	0.0123723	-0.00810886	0.858194	-0.10009	0.0270399	-0.186496	3.38782e-05	-0.0952484	0.0354226	-0.347082	2.91833e-15	-0.15629	0.000530196	0.0582331	0.199072	-0.0990184	0.0287311	-0.0163523	0.718599	-0.0525197	0.246855	0.0184885	0.683705	-0.00210733	0.962965	-0.0445394	0.326163	0.0992261	0.0283964	-0.0231161	0.610465	0.0998885	0.027351	0.0217475	0.631766
LILRA5	blue	0.246181	3.60104e-08	-0.0506342	0.264254	0.129859	0.00405964	-0.052321	0.24865	0.20933	3.09882e-06	0.209297	3.10994e-06	0.53363	2.88781e-37	0.146433	0.00117854	-0.0256127	0.572452	-0.00143632	0.974753	-0.0496102	0.274047	-0.0142659	0.753255	0.0277762	0.540444	-0.0211484	0.641188	-0.00756758	0.867569	-0.0496436	0.273725	-0.0386942	0.393709	0.101124	0.0254888	-0.0187162	0.680023
ZBED2	blue	0.231091	2.44445e-07	0.0609927	0.17857	0.00627814	0.889976	-0.0370007	0.414754	0.126948	0.0049766	0.169554	0.000167718	0.346253	3.42823e-15	0.167229	0.00020653	-0.00176461	0.968985	0.202601	6.4528e-06	0.00235722	0.958577	0.0400582	0.377236	-0.0543044	0.231138	-0.0293433	0.517832	-0.0341442	0.451717	-0.104635	0.020784	-0.0401349	0.376323	0.0448695	0.322586	-0.0182433	0.687679
ALOX5AP	blue	0.347908	2.48407e-15	-0.0721251	0.111546	-0.00946088	0.834865	-0.0312698	0.490717	0.29931	1.47454e-11	0.0231224	0.610367	0.612619	1.31112e-51	0.159637	0.000399865	-0.0716353	0.114004	-0.0126765	0.779994	-0.0774011	0.087632	-0.047203	0.298036	-0.0600893	0.185102	-0.0706903	0.118867	-0.0439182	0.332963	-0.165973	0.000230841	-0.117859	0.00916072	-0.159073	0.0004195	-0.0355423	0.433399
KAT2A	blue	-0.14366	0.00146293	-0.154185	0.000631345	-0.0382511	0.399153	-0.0586524	0.19585	-0.296491	2.32875e-11	-0.130802	0.0037972	-0.305085	5.69277e-12	-0.236196	1.29717e-07	-0.0858724	0.0580101	-0.0969091	0.0323272	7.69373e-05	0.998647	-0.0802032	0.076718	0.0204992	0.651464	0.0237427	0.600819	-0.0601579	0.184599	0.046793	0.302257	0.00656748	0.88494	0.160415	0.00037417	0.0405805	0.371042
C1orf131	blue	-0.238663	9.50116e-08	-0.076888	0.0897594	0.0883427	0.0511328	-0.154264	0.000627249	-0.168175	0.000189815	-0.128284	0.00453468	-0.362364	1.3739e-16	-0.331984	5.09168e-14	0.153978	0.000642204	-0.0180739	0.690428	-0.00589859	0.896589	-0.0152211	0.737322	0.0848071	0.0612038	0.182679	4.92065e-05	-0.0470603	0.299501	0.0696614	0.124345	-0.0420617	0.353822	0.312712	1.56772e-12	0.00818812	0.856822
GIMAP4	blue	0.617303	1.36924e-52	0.0603366	0.183297	0.0253705	0.57609	0.00507758	0.910918	0.233419	1.83428e-07	0.227418	3.82161e-07	0.847261	1.24821e-135	0.433579	8.72677e-24	-0.0964913	0.0330833	-0.0304656	0.501942	-0.0836298	0.0649009	-0.0329852	0.467229	-0.0489484	0.280508	-0.0603174	0.183436	-0.0431562	0.341426	-0.099599	0.0278037	-0.0936105	0.038719	-0.144822	0.00133682	-0.0526005	0.246128
EGR2	blue	0.324177	2.10205e-13	-0.0186781	0.68064	-0.094298	0.037305	0.0595741	0.188905	0.244158	4.69014e-08	0.0944434	0.0370116	0.5314	6.49044e-37	0.445611	3.51069e-25	-0.0440593	0.33141	0.00879873	0.846273	0.0444058	0.327617	-0.0178226	0.694514	-0.00813709	0.857705	0.00553444	0.902941	0.0101962	0.822237	-0.0441711	0.330183	-0.0534039	0.238977	-0.1847	4.04207e-05	-0.022885	0.614039
NECTIN4	blue	-0.160737	0.000363996	-0.184209	4.24085e-05	-0.0379153	0.403307	-0.0761873	0.0927318	-0.172465	0.000128756	-0.142882	0.0015534	-0.33247	4.6546e-14	-0.186859	3.26854e-05	0.0692897	0.126371	0.060535	0.181858	0.0447765	0.323592	0.025805	0.569571	-0.12063	0.0076367	-0.0573714	0.205811	-0.134814	0.00284386	-0.210043	2.86308e-06	-0.0755067	0.0956938	-0.165599	0.000238585	-0.00817834	0.856992
SOX4	blue	-0.304904	5.86725e-12	-0.0932233	0.039535	-0.0504477	0.266019	-0.12874	0.00439223	0.0228781	0.614146	-0.118516	0.0087768	-0.386412	7.94866e-19	-0.201095	7.57897e-06	-0.060474	0.182299	-0.0441015	0.330946	0.000969441	0.982958	-0.072289	0.110733	0.23352	1.81161e-07	0.0984285	0.0297004	0.147851	0.00105373	0.0908978	0.0447491	0.142195	0.00163741	0.226893	4.07117e-07	0.0440956	0.331012
ARHGEF6	blue	0.470458	3.0312e-28	0.369715	2.97666e-17	0.0384326	0.396917	0.123021	0.0065085	0.2038	5.67235e-06	0.225174	5.00338e-07	0.775532	3.85171e-99	0.552024	2.86843e-40	-0.112096	0.013222	-0.0406062	0.37074	-0.0855217	0.0590458	-0.0369273	0.415682	-0.0606509	0.181021	-0.066407	0.142967	-0.0282488	0.533574	-0.137463	0.00233983	-0.114875	0.0110984	-0.358247	3.18126e-16	-0.0487336	0.282626
HMOX1	blue	0.217745	1.19656e-06	-0.154321	0.000624298	-0.0655123	0.148443	0.00957715	0.832865	0.0685579	0.130435	0.0295553	0.514811	0.399931	3.61989e-20	0.231297	2.3835e-07	-0.0379531	0.402838	-0.0353216	0.436261	-0.0543773	0.230512	-0.0259441	0.567491	-0.040486	0.372158	-0.0542572	0.231545	-0.038904	0.391148	-0.0881217	0.0517189	-0.0614452	0.175364	-0.0859889	0.0576694	-0.0451999	0.319032
ROR1	blue	0.12443	0.00591612	0.173132	0.000121115	0.0579242	0.201469	-0.0176117	0.697951	0.313468	1.3768e-12	0.258604	6.75171e-09	0.332087	4.99594e-14	0.221261	7.95004e-07	0.0172857	0.703276	-0.049266	0.277395	-0.0786889	0.08247	-0.0125249	0.782559	-0.0350368	0.439972	-0.0460761	0.309733	0.175388	9.83058e-05	-0.0751559	0.0972494	0.336004	2.41459e-14	-0.000637759	0.988788	-0.055879	0.217873
C10orf128	blue	0.440176	1.52262e-24	0.0616474	0.173945	0.0155966	0.731088	0.0317865	0.483575	0.158732	0.00043179	0.162157	0.000322129	0.761514	1.41163e-93	0.336699	2.1197e-14	-0.0429256	0.344015	-0.0316361	0.485649	-0.0930636	0.0398759	-0.0422043	0.352192	-0.0378107	0.404606	-0.0633315	0.162458	-0.0529378	0.243108	-0.109852	0.0151889	-0.110073	0.0149842	-0.213144	2.02272e-06	-0.0656632	0.147508
EPCAM	blue	-0.195593	1.35023e-05	-0.25254	1.54556e-08	-0.0629255	0.165173	-0.193306	1.70845e-05	-0.224366	5.50892e-07	-0.203016	6.17158e-06	-0.415759	8.08399e-22	-0.341077	9.27014e-15	0.167667	0.000198624	-0.132569	0.00334637	-0.0313702	0.489324	-0.0416988	0.357994	-0.0543295	0.230923	-0.0422273	0.351929	-0.121926	0.00700509	0.0460488	0.31002	0.0090227	0.842411	0.187148	3.17627e-05	0.00352326	0.938121
KLF10	blue	0.210733	2.65126e-06	-0.098622	0.0293795	-0.0646733	0.153721	0.0309387	0.495323	0.234699	1.56446e-07	0.0518555	0.25289	0.221185	8.02069e-07	0.124396	0.00592971	-0.0305109	0.501307	0.134544	0.0029003	-0.0272988	0.54743	-0.0117667	0.795422	-0.0498119	0.272099	-0.0458202	0.312431	0.00359931	0.936788	-0.0387023	0.39361	-0.0903828	0.0459789	-0.0343371	0.449164	0.0122502	0.787213
EPB41L2	blue	0.283959	1.67241e-10	0.333826	3.62231e-14	0.0281938	0.53437	0.0682425	0.132218	0.539803	2.974e-38	0.313065	1.47575e-12	0.633291	4.57052e-56	0.538022	5.75792e-38	-0.0435114	0.337464	0.0416112	0.359006	0.0835753	0.0650766	-0.00530663	0.906918	-0.0372576	0.41152	-0.0236831	0.601734	0.164989	0.000251717	-0.0663951	0.143038	0.122158	0.00689724	-0.0864499	0.0563374	-0.054253	0.231581
MYO7A	blue	0.260828	4.9557e-09	-0.0124214	0.784312	0.0343159	0.449444	-0.144792	0.00133994	0.020927	0.644685	-0.0174183	0.701108	0.263529	3.39162e-09	-0.117029	0.00966667	-0.0346321	0.445275	-0.0865815	0.0559618	-0.0729145	0.107672	-0.0533426	0.239518	-0.0392862	0.386508	-0.0433516	0.339243	-0.0734047	0.105321	0.0724381	0.109997	-0.0197313	0.663706	0.178044	7.66381e-05	0.0377067	0.405902
SIRPD	blue	0.20734	3.85921e-06	0.408463	4.78265e-21	0.0572041	0.207139	-0.00471643	0.917231	0.0845401	0.0620269	0.15011	0.000879719	0.58512	3.62792e-46	0.33643	2.22944e-14	-0.0195213	0.667069	0.00242316	0.95742	-0.0553349	0.222393	0.00838861	0.853356	0.00898154	0.84312	0.00793818	0.861148	-0.0385831	0.395069	-0.0521188	0.250486	-0.0474388	0.295627	-0.121547	0.00718485	-0.0534588	0.238495
RAB26	blue	-0.249109	2.44638e-08	-0.0389395	0.390716	0.0704978	0.119877	-0.0282187	0.53401	-0.181638	5.44059e-05	-0.0893485	0.0485344	-0.286674	1.10008e-10	-0.20143	7.31311e-06	0.00739821	0.870507	-0.0575281	0.204573	-0.0104486	0.817911	-0.0439323	0.332807	0.0094589	0.834899	-0.00380425	0.933197	-0.0439897	0.332175	0.209363	3.08748e-06	-0.00754933	0.867886	0.129524	0.00415669	0.0437866	0.334415
CYP27A1	blue	0.321319	3.49698e-13	-0.115087	0.0109502	-0.0900947	0.0466792	0.0525655	0.246442	-0.0415237	0.360018	0.155535	0.000564613	0.479655	1.91587e-29	0.377273	5.92553e-18	0.0077609	0.864218	-0.0813093	0.0727257	-0.0808357	0.0744138	-0.0395164	0.383728	-0.00234304	0.958826	-0.0563144	0.214303	-0.0429217	0.344059	-0.0819262	0.070574	-0.0887909	0.0499609	-0.291351	5.2897e-11	-0.055645	0.219809
FPR1	blue	0.34627	3.41686e-15	-0.0153498	0.735183	0.0982152	0.0300578	-0.0332957	0.463044	0.321151	3.60266e-13	0.116928	0.00973015	0.665623	9.2629e-64	0.209205	3.14189e-06	-0.0698327	0.123419	0.0174882	0.699966	-0.0669336	0.139816	-0.00311328	0.945309	-0.0307788	0.497555	-0.0511322	0.259579	-0.0241613	0.594414	-0.112356	0.0130089	-0.0726728	0.108847	-0.00765969	0.865972	-0.045607	0.314689
GMFG	blue	0.561459	6.97492e-42	-0.138309	0.00219693	-0.0243771	0.591125	0.0176113	0.697957	0.150269	0.000868589	0.0791485	0.0806887	0.716996	3.4413e-78	0.298619	1.65004e-11	-0.0794162	0.0796652	-0.0299799	0.508787	-0.0823427	0.0691511	-0.0600319	0.185522	-0.0376289	0.406872	-0.0694032	0.125749	-0.0657167	0.147177	-0.123694	0.00621932	-0.120259	0.00782687	-0.149958	0.000890604	-0.0540494	0.23334
PLEKHO2	blue	0.573485	5.12639e-44	-0.132128	0.00345409	-0.0564868	0.212901	0.0059521	0.895656	0.332232	4.86432e-14	0.162112	0.000323393	0.861745	2.5028e-145	0.40916	4.04349e-21	-0.0567454	0.21081	-0.0325109	0.473659	-0.0769475	0.0895104	-0.0359575	0.428042	-0.0576723	0.203439	-0.0676002	0.135905	-0.0164926	0.716289	-0.124333	0.005955	-0.0964433	0.0331711	-0.148222	0.00102314	-0.0441176	0.33077
TMEM150B	blue	0.376604	6.84808e-18	-0.081264	0.0728859	-0.0570056	0.208722	0.0139558	0.758449	0.0945388	0.0368202	0.144279	0.00139452	0.707615	2.54429e-75	0.423905	1.0547e-22	0.296026	2.50976e-11	-0.0486262	0.28369	-0.0653618	0.149379	0.00750997	0.868568	-0.011635	0.797661	-0.037549	0.407869	-0.0266972	0.556295	-0.0274024	0.545911	-0.0591174	0.192323	-0.0813774	0.0724857	-0.0479899	0.290045
TRAP1	blue	-0.135871	0.00263197	-0.269585	1.42644e-09	-0.000202739	0.996436	-0.157425	0.000482127	-0.181582	5.46997e-05	-0.137456	0.00234106	-0.322347	2.91387e-13	-0.273103	8.53864e-10	0.0288247	0.52526	-0.0280521	0.536428	0.0167437	0.71216	-0.0504008	0.266464	-0.0189617	0.676063	0.0167263	0.712446	-0.0736213	0.104294	0.0218533	0.630108	0.045727	0.313416	0.247157	3.16751e-08	-0.0334209	0.461363
ADTRP	blue	0.14099	0.00179504	0.0196457	0.665076	0.0315629	0.486659	0.00815207	0.857446	0.102656	0.0233336	0.0619186	0.172055	0.323368	2.429e-13	0.247401	3.06723e-08	0.194543	1.50467e-05	0.0635082	0.161287	0.0529633	0.242881	0.0296256	0.51381	0.0591594	0.192007	0.0219119	0.629191	0.00242944	0.957309	-0.0519775	0.251775	-0.00841764	0.852854	0.000238378	0.995809	-0.0510733	0.260128
LILRA1	blue	0.42582	6.48036e-23	0.0702503	0.121186	-0.0399916	0.378031	0.0226041	0.618396	0.186584	3.35843e-05	0.226458	4.2901e-07	0.692856	4.96092e-71	0.318452	5.79473e-13	-0.0775698	0.0869414	0.0248197	0.584404	-0.0438237	0.334005	-0.0332767	0.4633	-0.0401524	0.376114	-0.0516472	0.254804	-0.0253007	0.57714	-0.0736152	0.104323	-0.0722731	0.110811	-0.094435	0.0370285	-0.0304008	0.502853
SPI1	blue	0.579331	4.3674e-45	-0.176369	8.97059e-05	-0.134387	0.00293379	0.0131263	0.772399	0.190468	2.27926e-05	0.124711	0.0058037	0.827021	1.19253e-123	0.345888	3.67924e-15	-0.0927226	0.0406121	-0.0701132	0.121916	-0.0959477	0.0340897	-0.0472589	0.297463	-0.0663554	0.143278	-0.0747712	0.0989791	-0.0586085	0.196186	-0.125802	0.00538606	-0.117121	0.00960963	-0.201861	6.98454e-06	-0.0505054	0.265473
SLC7A7	blue	0.52666	3.5572e-36	-0.0820464	0.0701609	-0.0274526	0.545174	-0.0727309	0.108564	0.239285	8.77934e-08	0.158126	0.000454496	0.801833	9.35209e-111	0.295073	2.92509e-11	0.152765	0.000709399	0.00736624	0.871061	-0.0672677	0.137845	0.000812701	0.985713	-0.0442953	0.328824	-0.0580684	0.200347	-0.0529052	0.243398	-0.0775517	0.087015	-0.0890481	0.0492987	-0.0413132	0.36246	-0.0614624	0.175243
SPP1	blue	0.0812475	0.0729442	-0.0776741	0.0865163	0.0742489	0.101366	-0.112136	0.0131889	0.267664	1.88195e-09	-0.0433461	0.339305	0.241815	6.35076e-08	-0.101815	0.0244965	0.0365899	0.419958	-0.00311997	0.945192	-0.0229244	0.61343	-0.00436691	0.923345	-0.0073004	0.872204	-0.0123533	0.785465	-0.00532117	0.906664	-0.0290245	0.522393	-0.0339435	0.454382	0.11105	0.014109	-0.0217245	0.632127
DCSTAMP	blue	0.303881	6.9546e-12	0.000137434	0.997584	-0.0613974	0.1757	0.0403422	0.373861	0.106971	0.0180891	0.0703902	0.120445	0.570892	1.50397e-43	0.356232	4.77661e-16	0.00538795	0.905498	-0.0492956	0.277106	-0.0704429	0.120166	-0.0234302	0.605622	-0.0412523	0.363169	-0.0411488	0.364375	-0.0287053	0.526979	-0.0469848	0.300278	-0.0645818	0.154306	-0.23623	1.29165e-07	-0.046745	0.302754
DBNDD1	blue	-0.224306	5.54847e-07	-0.25284	1.48433e-08	-0.0580962	0.200131	-0.141148	0.00177371	-0.0975098	0.0312659	-0.173623	0.000115757	-0.433581	8.72204e-24	-0.257529	7.83077e-09	-0.0195467	0.666661	-0.1159	0.0103954	-0.0608954	0.179265	0.00549665	0.9036	-0.0700759	0.122115	-0.0495173	0.274949	-0.0559285	0.217465	0.0928056	0.0404319	-0.0079101	0.861634	0.188788	2.69795e-05	0.0102613	0.821121
SALL4	blue	-0.200025	8.49004e-06	0.134414	0.002928	-0.00600189	0.894789	0.0713906	0.115248	0.0882256	0.0514427	-0.0179277	0.692805	-0.161988	0.000326872	-0.0853477	0.0595655	-0.0917617	0.0427484	-0.0208879	0.645305	0.0100268	0.825141	0.00449184	0.921159	0.072729	0.108573	0.0467943	0.302243	0.110706	0.0144121	0.0584255	0.197588	0.149971	0.000889647	0.0641885	0.156836	0.05665	0.211579
TNFSF12	blue	0.462151	3.41984e-27	-0.322376	2.89865e-13	-0.237258	1.13492e-07	0.0255845	0.572875	0.125118	0.00564474	0.0821008	0.0699746	0.489744	8.40111e-31	0.395707	9.64929e-20	-0.039422	0.384866	-0.119728	0.00810609	-0.141347	0.00174697	-0.0743606	0.100852	-0.113907	0.011801	-0.110268	0.014806	-0.0973995	0.0314585	-0.203356	5.95023e-06	-0.178209	7.5457e-05	-0.446306	2.90469e-25	-0.0717255	0.113548
CD300LF	blue	0.348535	2.19794e-15	-0.0395124	0.383777	-0.0421515	0.352794	0.0201804	0.656535	0.00303299	0.946718	0.0611062	0.177762	0.603551	9.3488e-50	0.288475	8.31095e-11	0.00214306	0.962338	-0.0575484	0.204414	-0.0798821	0.0779097	-0.0424354	0.349558	0.00342969	0.939761	-0.0570827	0.208106	-0.0581966	0.199353	-0.0780714	0.0849135	-0.0914185	0.0435341	-0.247473	3.03787e-08	-0.064458	0.155099
MCOLN1	blue	0.2836	1.76728e-10	-0.268542	1.65835e-09	-0.162826	0.000304019	-0.00380578	0.93317	0.0647209	0.153418	0.107837	0.0171703	0.511813	6.18508e-34	0.425346	7.31351e-23	0.0370343	0.414331	-0.0335456	0.459692	-0.0859127	0.0578922	0.0237542	0.600644	0.00197722	0.96525	-0.0407733	0.368772	-0.0165234	0.715781	0.00979487	0.829123	-0.0561142	0.215939	-0.124357	0.00594563	-0.032406	0.475088
CBX8	blue	-0.196104	1.28053e-05	-0.233728	1.76537e-07	0.00679827	0.880926	-0.108855	0.0161425	-0.241382	6.71442e-08	-0.184589	4.0862e-05	-0.364255	9.3056e-17	-0.275437	6.05035e-10	-0.0299982	0.508527	-0.0788841	0.0817097	-0.0282117	0.534111	-0.0532549	0.240292	0.00899754	0.842844	-0.0179003	0.69325	-0.068923	0.128395	0.230286	2.69776e-07	-0.0213949	0.637304	0.144049	0.00141961	0.0245263	0.588855
APOBR	blue	0.334038	3.48247e-14	-0.116215	0.0101873	-0.120806	0.00754804	0.0459067	0.311516	0.0835925	0.065021	0.0304747	0.501815	0.477046	4.22869e-29	0.306309	4.64056e-12	-0.0409482	0.36672	-0.0479211	0.290739	-0.0777101	0.0863703	-0.0464012	0.306328	-0.0774726	0.0873384	-0.0689341	0.128333	-0.0571053	0.207926	-0.103644	0.0220286	-0.110939	0.0142064	-0.295007	2.95598e-11	-0.0423896	0.35008
EIF2AK1	blue	-0.20199	6.88884e-06	-0.283244	1.86627e-10	-0.110512	0.0145851	-0.1722	0.000131914	-0.0701467	0.121737	-0.170846	0.000149231	-0.379805	3.41831e-18	-0.333588	3.7855e-14	-0.0201189	0.657516	-0.0357067	0.431273	-0.0138166	0.760785	0.00399641	0.929831	-0.0216987	0.632531	-0.0321326	0.478824	0.00429078	0.924677	0.0685964	0.130219	0.0345705	0.446086	0.283174	1.88627e-10	0.0962541	0.0335194
SELPLG	blue	0.600568	3.69404e-49	-0.163888	0.000277191	-0.125514	0.00549371	0.0320918	0.479383	0.243915	4.84055e-08	0.157739	0.000469554	0.819989	7.55776e-120	0.436493	4.05499e-24	0.192937	1.77412e-05	-0.0339288	0.454578	-0.0735413	0.104672	-0.0435279	0.337281	-0.0803549	0.07616	-0.0833724	0.0657333	-0.0634971	0.16136	-0.147106	0.00111772	-0.135686	0.00266794	-0.30012	1.29199e-11	-0.0604648	0.182366
MRAS	blue	0.267731	1.86381e-09	-0.0131296	0.772343	-0.0569292	0.209333	-0.00386227	0.93218	0.360376	2.06385e-16	0.180689	5.95948e-05	0.398371	5.2076e-20	0.297972	1.83278e-11	-0.173148	0.000120928	-0.0229362	0.613247	-0.0724633	0.109873	0.0707071	0.118779	-0.0245161	0.58901	0.00700676	0.877303	0.130095	0.00399243	-0.0627886	0.166097	0.0286757	0.527406	-0.0451129	0.319966	0.054866	0.226343
PITX2	blue	-0.214235	1.78798e-06	-0.05638	0.213769	-0.0117643	0.795463	-0.0851879	0.0600459	-0.0503912	0.266556	-0.0607848	0.180058	-0.235422	1.42939e-07	-0.0967735	0.0325709	-0.0462215	0.308207	-0.0781391	0.084643	-0.0207961	0.646757	-0.045062	0.320513	0.0361362	0.425749	-2.73273e-05	0.99952	0.00272102	0.952191	0.0338885	0.455115	0.0109254	0.809758	0.119315	0.00832909	0.0311541	0.492323
TFAP4	blue	-0.133264	0.00318265	-0.236163	1.30264e-07	-0.119056	0.00847195	-0.0985197	0.0295488	-0.217332	1.25489e-06	-0.119464	0.0082481	-0.333764	3.6641e-14	-0.250654	1.9912e-08	-0.0186528	0.681049	0.0288056	0.525534	0.149189	0.000947163	-0.0611841	0.177209	0.112325	0.013034	0.0819591	0.0704607	-0.0303271	0.50389	0.117121	0.00960936	0.0747639	0.0990121	0.209443	3.06009e-06	0.0118458	0.794078
PTGER4	blue	0.390874	2.91304e-19	0.198402	1.00743e-05	0.0431298	0.341723	0.16223	0.000320125	0.20148	7.27398e-06	0.16929	0.000171761	0.674968	3.62795e-66	0.50091	2.3316e-32	-0.0111446	0.806016	0.0623267	0.169241	-0.0231344	0.610183	-0.0247234	0.585863	-0.016663	0.713485	-0.000195334	0.996566	0.299877	1.34426e-11	-0.106192	0.0189522	-0.047068	0.299422	-0.206129	4.40561e-06	-0.0665483	0.142116
SLC31A2	blue	0.471067	2.53095e-28	0.0233038	0.607569	0.0302048	0.505611	-0.0570179	0.208624	0.256594	8.90519e-09	0.160897	0.000359038	0.790867	1.03969e-105	0.231469	2.33351e-07	-0.0623814	0.168866	0.090459	0.0457952	-0.0430222	0.342929	0.0378584	0.404014	-0.0163466	0.718693	-0.0467928	0.302259	-0.0424001	0.349959	-0.0812422	0.072963	-0.0782005	0.084398	-0.0320557	0.479877	-0.0536575	0.236751
UBASH3B	blue	0.13655	0.00250342	0.138969	0.00209091	0.0510821	0.260046	0.0399591	0.378419	0.21473	1.69012e-06	0.0676073	0.135864	0.422206	1.62027e-22	0.198478	9.99392e-06	0.134308	0.00295056	0.108346	0.01665	-0.00431764	0.924207	0.287463	9.7322e-11	-0.0267786	0.555091	-0.0269377	0.552743	0.184898	3.96451e-05	-0.0509889	0.260918	-0.0271152	0.550128	0.0811275	0.0733701	-0.0662847	0.143706
PROM2	blue	-0.0177991	0.694897	-0.154554	0.000612421	-0.0624505	0.168394	-0.0459344	0.311224	-0.070654	0.119057	-0.0685437	0.130514	-0.155792	0.000552645	-0.129732	0.00409611	0.217779	1.19194e-06	0.175322	9.89059e-05	0.125826	0.00537702	0.0581855	0.199439	-0.0711689	0.116384	-0.0249102	0.583034	-0.0920779	0.0420351	-0.134115	0.00299229	-0.0775852	0.0868783	-0.0527576	0.244718	-0.0521022	0.250637
FCGR3B	blue	0.0610083	0.178459	0.102931	0.0229641	0.103539	0.0221651	0.0263974	0.56074	0.143475	0.00148405	0.0588761	0.194148	0.276846	4.90639e-10	0.131278	0.00367061	0.00165144	0.970973	0.217048	1.29667e-06	0.031237	0.491172	0.0106081	0.815182	-0.00886497	0.845131	-0.0276434	0.542383	-0.0199275	0.66057	-0.0464985	0.305313	-0.0285999	0.528497	0.0611298	0.177594	-0.0220382	0.627214
SYT7	blue	-0.234914	1.52295e-07	-0.10904	0.015962	-0.03081	0.497118	-0.124603	0.00584661	-0.139452	0.00201647	-0.0906593	0.0453153	-0.359801	2.32082e-16	-0.109995	0.0150562	-0.0863369	0.0566615	-0.112359	0.0130066	-0.0358936	0.428864	-0.0517727	0.25365	-0.00947145	0.834683	-0.0468261	0.301914	-0.0517265	0.254074	0.211721	2.37397e-06	0.0251969	0.578704	0.037557	0.407769	0.082017	0.0702617
JPT2	blue	-0.160482	0.000372046	-0.225878	4.59899e-07	-0.044127	0.330667	-0.0461029	0.309451	-0.0732829	0.105901	-0.128801	0.00437346	-0.278614	3.76539e-10	-0.270587	1.23348e-09	0.0356878	0.431517	0.110214	0.014855	0.0700557	0.122222	0.146776	0.00114715	-0.0562994	0.214425	-0.00108298	0.980962	-0.0629559	0.164969	-0.0461761	0.308682	0.0341913	0.451093	0.217856	1.18142e-06	-0.00504727	0.911448
CCRL2	blue	0.360406	2.05162e-16	-0.0733974	0.105355	-0.0459238	0.311336	0.0165131	0.71595	-0.00810812	0.858206	0.0595214	0.189297	0.570644	1.66657e-43	0.326313	1.432e-13	0.372668	1.59221e-17	-0.0253875	0.575833	-0.0607258	0.180482	-0.0327101	0.470953	-0.0461378	0.309085	-0.0673085	0.137607	-0.0631722	0.163519	-0.0879512	0.052175	-0.1103	0.0147768	-0.258772	6.59594e-09	-0.072039	0.111975
TFB2M	blue	-0.160628	0.000367398	-0.205618	4.65812e-06	0.104385	0.0210928	-0.17636	8.97776e-05	-0.183548	4.52274e-05	-0.149456	0.000927203	-0.337248	1.91231e-14	-0.269753	1.39217e-09	-0.0281144	0.535522	-0.0675577	0.136152	-0.0332249	0.463997	-0.044288	0.328904	0.0518019	0.253382	0.0315688	0.486578	-0.0677035	0.135307	-0.0421666	0.352622	0.0447772	0.323585	0.176936	8.50652e-05	-0.0160136	0.724188
PILRA	blue	0.523887	9.50451e-36	-0.129344	0.00420973	-0.0637458	0.159721	-0.0610952	0.17784	0.303719	7.14315e-12	0.17679	8.6237e-05	0.848716	1.47414e-136	0.339841	1.17238e-14	-0.0792289	0.08038	-0.0362925	0.423749	-0.0831262	0.0665376	-0.00347116	0.939034	-0.0327584	0.470298	-0.0554744	0.221228	-0.0410746	0.365241	-0.107252	0.0177868	-0.0679569	0.133847	-0.0908999	0.0447443	-0.038985	0.390162
ABCG1	blue	0.0587222	0.195318	-0.0757855	0.0944715	-0.0710025	0.117243	-0.017598	0.698175	0.0061525	0.892164	0.0257751	0.570018	0.184033	4.31394e-05	0.141301	0.00175308	0.107884	0.0171218	0.0263898	0.560853	0.0282433	0.533653	0.0887422	0.0500871	0.034772	0.443438	-0.0281373	0.53519	-0.034159	0.45152	0.0245948	0.587814	-0.0363584	0.422907	-0.0627415	0.166416	-0.0101701	0.822684
ARHGAP18	blue	0.256485	9.03988e-09	0.254912	1.12064e-08	0.139591	0.00199543	0.200895	7.74184e-06	0.306132	4.77987e-12	0.284848	1.45892e-10	0.637485	5.17517e-57	0.317653	6.66519e-13	0.0109543	0.809265	-0.01793	0.692767	-0.0965991	0.0328867	-0.0448534	0.322761	-0.0564119	0.213509	-0.0629544	0.164979	-0.00721318	0.873718	-0.0657855	0.146753	-0.112608	0.0128052	-0.160442	0.000373323	-0.047826	0.291698
SAMD10	blue	-0.0746301	0.0996192	-0.23223	2.12501e-07	-0.109	0.0160007	-0.0409899	0.366232	-0.246926	3.26496e-08	-0.141135	0.00177537	-0.27318	8.44344e-10	-0.210151	2.82864e-06	0.0778285	0.0858907	-0.0807891	0.0745817	-0.0468591	0.301574	-0.0837965	0.0643666	-0.045566	0.315125	-0.0482934	0.287002	-0.0691926	0.126904	0.0133154	0.769212	0.0146467	0.746889	-0.0185386	0.682895	0.0172863	0.703266
RHBDL1	blue	-0.14197	0.00166585	-0.17544	9.78253e-05	-0.0538483	0.235086	0.00139117	0.975546	-0.203112	6.10824e-06	-0.116532	0.00998189	-0.323967	2.18235e-13	-0.134409	0.00292896	-0.0586496	0.195872	-0.100566	0.0263161	-0.0644471	0.155169	-0.0854219	0.0593434	-0.0642844	0.156216	-0.0314592	0.488092	-0.107574	0.017445	-0.0311638	0.492189	-0.0859605	0.0577524	-0.143788	0.00144851	-0.0210298	0.643061
PODXL2	blue	-0.195053	1.42769e-05	-0.161478	0.000341563	-0.0621696	0.17032	-0.0847747	0.0613035	-0.0234446	0.6054	-0.0957918	0.0343831	-0.290592	5.9621e-11	-0.137322	0.00236435	-0.112984	0.012507	-0.0405739	0.37112	-0.0132094	0.770998	-0.0409096	0.367172	0.0996413	0.0277372	0.128556	0.00444934	0.0679682	0.133783	0.186927	3.24667e-05	0.125042	0.00567413	0.0857524	0.0583628	0.0174957	0.699844
ARID5A	blue	0.547393	1.70337e-39	-0.232711	2.00239e-07	-0.139751	0.00197152	0.0817892	0.0710472	0.256407	9.13592e-09	0.015852	0.72686	0.559435	1.56368e-41	0.212038	2.29097e-06	-0.0745724	0.0998823	-0.0526191	0.245961	-0.0281471	0.535048	-0.0565136	0.212683	-0.0198833	0.661274	-0.0252485	0.577926	0.00784658	0.862734	-0.0911275	0.0442096	-0.0652165	0.150287	-0.0122576	0.787087	-0.0114611	0.800621
LBX2	blue	-0.100275	0.026756	0.00746662	0.86932	0.0517109	0.254218	-0.0662207	0.144094	-0.116511	0.00999551	-0.089984	0.0469506	-0.197151	1.14829e-05	-0.189968	2.39695e-05	0.0175229	0.6994	-0.0209194	0.644806	-0.0403608	0.373641	-0.00617941	0.891696	0.0116067	0.798143	-0.0223107	0.622963	-0.0146222	0.747298	0.00334434	0.941257	0.0186917	0.68042	0.0637879	0.159445	0.0834081	0.0656174
TARS2	blue	-0.1561	0.000538644	-0.230152	2.74229e-07	-0.0225136	0.619804	-0.146218	0.00119865	-0.247639	2.9724e-08	-0.144315	0.00139056	-0.353731	7.87972e-16	-0.240786	7.24794e-08	-0.0685409	0.13053	-0.0742176	0.10151	-0.0530762	0.241876	-0.0226189	0.618167	-0.0214337	0.636693	0.0646401	0.153933	-0.0635814	0.160803	0.0484577	0.285363	0.0248039	0.584643	0.171109	0.000145707	0.00476501	0.916381
MMACHC	blue	-0.257832	7.51136e-09	-0.00269752	0.952604	0.0996832	0.0276715	-0.113758	0.011913	-0.150315	0.000865369	-0.07733	0.0879241	-0.303318	7.63372e-12	-0.257995	7.34404e-09	-0.0609286	0.179028	-0.00833984	0.854199	0.0144658	0.74991	-0.0453475	0.317454	0.19794	1.05739e-05	0.0929262	0.0401712	0.0773853	0.0876968	0.0174354	0.700829	-0.0437286	0.335056	0.225671	4.71474e-07	-0.0200643	0.658386
KDM5B	blue	-0.30899	2.95515e-12	0.167815	0.000196022	0.220231	8.9677e-07	-0.113731	0.0119329	0.0631169	0.163889	-0.0495261	0.274863	-0.349175	1.93883e-15	-0.149965	0.000890075	-0.10335	0.0224104	0.000127374	0.997761	-0.0126675	0.780148	-0.00412624	0.927558	-0.0157899	0.727887	0.117929	0.00911918	0.191091	2.1403e-05	-0.0848652	0.0610261	0.238293	9.95772e-08	0.0765131	0.0913399	0.00251089	0.955879
FAM49A	blue	0.265479	2.57236e-09	0.255857	9.85116e-09	0.0156853	0.729619	0.0587676	0.194972	0.203095	6.11944e-06	0.19651	1.22758e-05	0.587715	1.17044e-46	0.413755	1.32314e-21	-0.125129	0.00564047	0.0118977	0.793194	-0.00448135	0.921342	0.183569	4.51361e-05	0.070956	0.117483	-0.0430431	0.342695	0.0192424	0.671545	-0.107233	0.0178065	-0.0577539	0.202799	-0.270959	1.16848e-09	-0.0661529	0.144505
CD68	blue	0.310839	2.15923e-12	-0.12534	0.00555953	-0.0964972	0.0330726	-0.0408689	0.36765	0.0976078	0.0310955	0.0867404	0.0555111	0.494588	1.80343e-31	0.309878	2.5427e-12	-0.0180385	0.691004	0.0190929	0.67395	-0.0517683	0.25369	-0.00852816	0.850945	-0.0480304	0.289638	-0.0487225	0.282737	-0.0457854	0.312798	-0.0777798	0.0860876	-0.0653106	0.149699	-0.0914988	0.043349	-0.0538384	0.235172
LILRB3	blue	0.416926	6.05985e-22	0.00650864	0.885964	-0.0600924	0.185079	-0.0132146	0.770911	0.166342	0.00022342	0.219741	9.49471e-07	0.759212	1.06387e-92	0.444698	4.49975e-25	-0.0632618	0.162921	-0.0462033	0.308397	-0.0844922	0.0621754	-0.0233305	0.607156	-0.034339	0.449139	-0.0618201	0.17274	-0.0378218	0.404469	-0.0733667	0.105501	-0.0609419	0.178933	-0.143125	0.00152459	-0.0272372	0.548335
SLC15A3	blue	0.557225	3.75205e-41	-0.132901	0.00326715	-0.12671	0.00505909	-0.0031145	0.945288	0.167227	0.000206567	0.151712	0.000772898	0.744052	3.68014e-87	0.427438	4.28466e-23	0.0135304	0.765594	-0.0282934	0.532928	-0.0727701	0.108373	0.104167	0.0213637	-0.0624453	0.168429	-0.0598852	0.186601	-0.0491301	0.278724	-0.102384	0.0237044	-0.0982988	0.0299174	-0.201143	7.53997e-06	-0.0555066	0.22096
HK3	blue	0.412962	1.60652e-21	-0.0537556	0.235894	0.00639612	0.887922	0.0207244	0.647892	0.124698	0.0058088	0.132566	0.00334701	0.755873	1.91357e-91	0.288501	8.27794e-11	-0.122429	0.00677318	-0.0646619	0.153794	-0.0887615	0.050037	-0.019236	0.671649	-0.0411106	0.364821	-0.0517707	0.253668	-0.041184	0.363965	-0.0726018	0.109194	-0.080016	0.0774109	-0.0659748	0.145592	-0.0519366	0.252148
FKBP11	blue	0.0930416	0.0399231	-0.178771	7.15441e-05	-0.0757771	0.0945082	-0.0818561	0.070816	-0.0575758	0.204198	-0.0573051	0.206337	-0.074504	0.100194	-0.07106	0.116946	-0.00580408	0.898237	-0.0527506	0.24478	-0.0630102	0.164604	-0.0650868	0.151102	-0.0540778	0.233094	-0.0512485	0.258495	-0.0738916	0.103025	-0.0093759	0.836327	-0.0896284	0.0478316	0.0147998	0.744335	-0.0401903	0.375664
CABYR	blue	-0.237452	1.10753e-07	-0.0471897	0.298173	-0.00749678	0.868797	-0.0760155	0.0934726	-0.151045	0.000815825	-0.0529842	0.242694	-0.287305	9.97382e-11	-0.0748989	0.0984023	-0.0471083	0.299007	-0.0529808	0.242725	0.0187045	0.680213	0.0436308	0.336138	0.0400331	0.377536	0.0509892	0.260915	-0.0166891	0.713056	0.159514	0.00040405	0.0497072	0.27311	0.148837	0.000974212	0.0425783	0.347937
PREX1	blue	0.414403	1.12872e-21	0.0303365	0.503757	0.00102606	0.981963	0.0509378	0.261396	0.182154	5.17658e-05	0.152114	0.000748058	0.64014	1.28079e-57	0.456968	1.50023e-26	-0.100678	0.026149	-0.0575835	0.204137	-0.074292	0.101167	-0.039143	0.388242	-0.0157702	0.728214	-0.0406828	0.369837	0.392921	1.82822e-19	-0.0593182	0.190815	-0.0417927	0.356912	-0.112125	0.0131978	-0.0444249	0.32741
PALD1	blue	0.297329	2.03402e-11	-0.0494655	0.275452	-0.0865694	0.0559962	0.0964383	0.0331802	0.170697	0.000151252	0.107709	0.0173037	0.419351	3.31565e-22	0.480611	1.43065e-29	-0.0870515	0.0546373	-0.0453038	0.317921	-0.0756005	0.0952813	-0.0668664	0.140215	-0.0380125	0.402102	-0.0140167	0.757428	0.0448934	0.322329	-0.08958	0.0479523	-0.086934	0.0549659	-0.250919	1.92179e-08	-0.0649554	0.151931
SELENOP	blue	0.140439	0.0018717	-0.032226	0.477546	-0.0517468	0.253887	0.0294875	0.515775	-0.0932148	0.0395533	0.123654	0.00623599	0.353662	7.98902e-16	0.276533	5.14098e-10	0.0215973	0.634122	-0.0692908	0.126365	-0.0517235	0.254102	-0.00878549	0.846502	-0.0160317	0.723888	-0.0334843	0.460513	-0.0589598	0.193513	-0.0830585	0.06676	-0.070032	0.122349	-0.272681	9.08431e-10	-0.0412912	0.362717
CCL24	blue	0.096184	0.033649	-0.0160888	0.722946	0.0951686	0.0355775	-0.0421358	0.352974	0.114309	0.0115048	0.0299535	0.50916	0.29278	4.21748e-11	0.0394423	0.384622	0.156212	0.000533658	-0.0125531	0.782082	-0.0151331	0.738785	-0.0164531	0.716939	0.000949239	0.983313	-0.00386779	0.932084	0.0029738	0.947756	0.0287353	0.526547	-0.0170941	0.706412	0.104969	0.0203786	-0.0299079	0.509806
STAC	blue	0.277322	4.5699e-10	-0.0323535	0.475805	-0.0580927	0.200159	-0.0251558	0.579324	0.152994	0.000696196	0.0060374	0.89417	0.475556	6.62689e-29	0.158264	0.000449225	-0.0303321	0.503818	-0.00217122	0.961843	-0.081102	0.0734608	-0.0448752	0.322526	-0.0730755	0.106895	-0.0657524	0.146957	-0.0241603	0.59443	-0.116192	0.0102025	-0.103691	0.0219689	-0.122485	0.00674762	-0.0538257	0.235283
MFSD9	blue	-0.255154	1.08436e-08	-0.11178	0.0134845	-0.0408043	0.368408	-0.173376	0.000118424	-0.0707265	0.118678	-0.118905	0.00855645	-0.397319	6.64863e-20	-0.217065	1.29404e-06	0.14013	0.00191598	0.0191474	0.673073	0.0827687	0.0677196	0.00249665	0.956129	0.0130752	0.773262	-0.00748398	0.869019	-0.0425017	0.348806	0.172299	0.000130718	0.0232493	0.608409	0.166167	0.000226914	0.0329745	0.467373
TM6SF1	blue	0.283278	1.85644e-10	0.270448	1.25861e-09	0.0658084	0.146612	0.00594486	0.895783	0.243644	5.01389e-08	0.173415	0.000118001	0.69541	9.37035e-72	0.384898	1.11373e-18	-0.0950217	0.0358641	-0.0408115	0.368324	-0.0872484	0.0540905	-0.0427227	0.346302	-0.00736478	0.871087	-0.036142	0.425674	-0.0144365	0.7504	0.0163084	0.719322	-0.0532272	0.240538	-0.202987	6.1908e-06	-0.0294804	0.515877
BCL9	blue	-0.160103	0.00038427	-0.105987	0.0191845	-0.109252	0.0157568	-0.131759	0.00354655	-0.0993118	0.0282592	-0.0827109	0.0679125	-0.34968	1.756e-15	-0.149473	0.000925869	-0.0959875	0.0340151	-0.0992101	0.028422	-0.0571992	0.207178	-0.0371461	0.412922	-0.0183187	0.686456	0.0200109	0.659238	0.10413	0.0214102	0.0634205	0.161867	0.0841187	0.0633439	0.105188	0.020116	0.062386	0.168835
SCIMP	blue	0.558333	2.42177e-41	0.12635	0.00518651	0.00802742	0.859603	0.0277533	0.540778	0.133664	0.00309194	0.26765	1.8856e-09	0.868903	1.54667e-150	0.378407	4.63402e-18	-0.0709337	0.117599	-0.0194361	0.668435	-0.0645613	0.154437	-0.0350772	0.439445	-0.0323251	0.476192	-0.0568615	0.209877	-0.0435077	0.337505	-0.0496883	0.273292	-0.0833315	0.0658664	-0.173219	0.000120149	-0.0524294	0.24767
SAMHD1	blue	0.54048	2.31188e-38	0.124097	0.00605163	0.0384263	0.396995	0.136078	0.00259217	0.235288	1.45354e-07	0.306162	4.75586e-12	0.845183	2.54025e-134	0.379826	3.40279e-18	-0.110765	0.0143596	0.030855	0.49649	-0.0509392	0.261383	0.00396995	0.930294	-0.0571942	0.207217	-0.0740031	0.102505	-0.028872	0.52458	-0.136398	0.00253179	-0.0511919	0.259022	-0.103237	0.0225585	-0.0429563	0.34367
CGREF1	blue	-0.165175	0.000247639	-0.0402286	0.375209	0.00652474	0.885684	-0.0816239	0.0716219	-0.0399556	0.378461	-0.053642	0.236887	-0.221581	7.65683e-07	-0.115093	0.0109459	-0.00290906	0.948892	-0.045801	0.312633	-0.0216075	0.633963	-0.00720715	0.873823	-0.00519861	0.908804	0.0277834	0.540339	-0.00863601	0.849082	0.101322	0.025201	0.015953	0.725189	0.189032	2.63285e-05	0.031271	0.4907
PMP22	blue	0.303213	7.76849e-12	-0.0110593	0.807472	-0.0763886	0.0918699	-0.0301471	0.506426	0.556497	4.99927e-41	0.174589	0.000105874	0.549811	6.74169e-40	0.459609	7.0835e-27	-0.0604694	0.182332	0.00937986	0.836259	-0.0921315	0.0419153	-0.0522503	0.24929	-0.070974	0.11739	-0.0636573	0.160303	-0.0136553	0.763493	-0.139279	0.00204284	-0.107192	0.0178509	-0.207534	3.77793e-06	-0.0564704	0.213034
TLR4	blue	0.309672	2.63323e-12	0.374082	1.17741e-17	0.239153	8.92768e-08	-0.000965532	0.983027	0.285728	1.27364e-10	0.219315	9.97731e-07	0.7577	3.95875e-92	0.341905	7.91598e-15	-0.0312277	0.491301	0.0119146	0.792909	-0.0669129	0.139939	-0.0198225	0.662247	-0.0345646	0.446163	-0.0503833	0.266631	-0.0112192	0.804743	-0.0822628	0.0694222	-0.0639051	0.158678	-0.112916	0.0125609	-0.0408751	0.367576
CHRNA5	blue	-0.246757	3.33845e-08	-0.0234869	0.604748	0.116129	0.0102436	-0.0884391	0.0508788	-0.133802	0.00306118	-0.0545071	0.2294	-0.272959	8.721e-10	-0.0486773	0.283183	-0.00579742	0.898353	-0.050883	0.261911	0.00365078	0.935886	-0.0199125	0.660808	0.049824	0.271983	0.00726101	0.872888	-0.00888125	0.84485	0.0747911	0.0988889	0.0485268	0.284676	0.0655926	0.147944	0.00186275	0.967261
BPHL	blue	-0.213957	1.8451e-06	-0.0765607	0.091138	0.0229657	0.612791	-0.064505	0.154797	-0.202176	6.75314e-06	-0.126681	0.0050693	-0.344323	4.97886e-15	-0.223483	6.11771e-07	-0.074092	0.102092	-0.0955351	0.0348708	-0.0743823	0.100752	-0.0543073	0.231113	0.0920458	0.0421071	-0.0461424	0.309036	-0.00894739	0.843709	0.118903	0.00855752	0.00448011	0.921364	0.127552	0.00477222	0.0157666	0.728272
TNS3	blue	0.231536	2.31436e-07	0.0918243	0.0426064	0.0443844	0.327851	-0.0654656	0.148732	0.398153	5.47839e-20	0.174653	0.000105244	0.484527	4.28668e-30	0.310815	2.16828e-12	-0.061341	0.176098	0.0305255	0.501101	-0.0698881	0.123121	0.0473611	0.296419	-0.0783735	0.083711	-0.0583858	0.197894	0.0549094	0.225975	0.0294327	0.516556	0.0238141	0.599724	-0.0267322	0.555777	-0.0425233	0.34856
CYP27B1	blue	0.161867	0.000330297	-0.0556663	0.219632	-0.0165773	0.714894	-0.0642336	0.156544	0.0362021	0.424905	-0.0569001	0.209566	0.141719	0.0016981	-0.113993	0.0117369	-0.0487255	0.282706	-0.0178586	0.693928	-0.046291	0.307479	-0.00380633	0.93316	-0.0254274	0.575234	-0.0313546	0.489541	-0.042939	0.343864	0.0033925	0.940413	-0.0297022	0.512722	0.0130923	0.772972	-0.00133603	0.976515
CARD14	blue	-0.157922	0.000462368	-0.0574954	0.204831	0.0636605	0.160282	-0.106214	0.0189264	-0.0993777	0.0281541	-0.0918644	0.0425155	-0.277003	4.79275e-10	-0.151366	0.000794936	0.0224022	0.621536	0.00495594	0.913044	0.0224641	0.620573	0.0222328	0.624176	-0.02163	0.633609	-0.00513376	0.909937	-0.0634156	0.161899	0.0209093	0.644965	-0.00450676	0.920898	0.219681	9.56156e-07	-0.013525	0.765685
TLCD1	blue	-0.0773716	0.0877532	-0.240148	7.86431e-08	-0.063891	0.158771	-0.130254	0.0039477	-0.258318	7.02405e-09	-0.163948	0.000275745	-0.331117	5.97184e-14	-0.237073	1.16171e-07	0.0141546	0.755117	-0.0769805	0.0893729	-0.0375464	0.407902	-0.038492	0.396187	-0.0835045	0.0653049	-0.0704324	0.120222	-0.124235	0.00599482	-0.0945072	0.0368834	-0.0304634	0.501973	0.042712	0.346424	-0.0155675	0.731572
BTK	blue	0.577554	9.28084e-45	0.0789755	0.0813555	0.0179268	0.692819	0.0524712	0.247292	0.158849	0.000427528	0.169092	0.00017484	0.901001	2.16218e-178	0.413677	1.3488e-21	-0.111911	0.0133747	-0.0495536	0.274597	-0.0988851	0.0289478	-0.052278	0.24904	-0.063609	0.160621	-0.0845508	0.0619936	-0.0681103	0.13297	-0.12852	0.00446052	-0.125975	0.00532228	-0.303922	6.90761e-12	-0.0641512	0.157078
DCST1	blue	-0.161982	0.000327037	0.110983	0.0141673	-0.0162164	0.72084	0.00222889	0.96083	-0.175981	9.30212e-05	-0.0685587	0.13043	-0.188492	2.77883e-05	-0.156928	0.000502634	-0.077345	0.0878625	-0.0444034	0.327644	-0.0378704	0.403865	0.0270594	0.55095	-0.0342421	0.45042	-0.0191073	0.673718	-0.0559581	0.217221	-0.0211607	0.640995	-0.0191903	0.672384	0.00812954	0.857836	0.0472188	0.297875
TOX2	blue	0.19996	8.54876e-06	-0.0795715	0.0790765	-0.0931817	0.0396237	0.0257999	0.569647	0.179127	6.9166e-05	0.0599613	0.186041	0.255671	1.0105e-08	0.231244	2.39912e-07	-0.0223984	0.621595	0.153138	0.000688083	0.0557157	0.219223	-0.0182234	0.688002	-0.00914839	0.840245	0.00806132	0.859016	0.0521422	0.250273	0.165674	0.000237015	-0.0133793	0.768136	0.0828058	0.0675964	-0.0374467	0.409149
FLVCR2	blue	0.223971	5.77382e-07	0.0412639	0.363034	0.0243236	0.591939	-0.0833703	0.0657401	0.077142	0.0887013	0.0441953	0.329919	0.467381	7.49553e-28	0.177705	7.9132e-05	-0.129294	0.00422444	0.0273003	0.547408	-0.0720283	0.112028	0.0295771	0.514499	-0.0831108	0.0665882	-0.0885016	0.0507147	-0.0211854	0.640606	-0.143843	0.00144243	0.0209582	0.644192	-0.0422673	0.351472	-0.00119262	0.979035
CBX4	blue	-0.0781937	0.0844251	-0.262556	3.89022e-09	-0.0977511	0.0308481	-0.14886	0.000972412	-0.1421	0.00164947	-0.16985	0.000163309	-0.337198	1.93055e-14	-0.21922	1.00882e-06	-0.04254	0.348371	-0.0476282	0.2937	0.0686525	0.129904	-0.0196441	0.665101	-0.0726978	0.108725	-0.0329967	0.467073	-0.11087	0.014267	0.0651735	0.150557	-0.0667618	0.140838	0.123602	0.00625787	0.0577095	0.203147
LARGE2	blue	-0.218351	1.11574e-06	-0.175158	0.00010043	-0.0692868	0.126387	-0.0955727	0.034799	-0.198654	9.81136e-06	-0.126266	0.0052166	-0.414263	1.16808e-21	-0.19736	1.12357e-05	-0.132035	0.00347709	-0.065809	0.146609	0.0120704	0.790263	-0.0630468	0.164358	0.0891708	0.0489854	-0.0198467	0.66186	-0.0463284	0.307088	0.156497	0.000521086	0.0346303	0.445299	0.0764288	0.0916984	0.0692979	0.126326
MARVELD3	blue	-0.0899259	0.0470935	-0.223386	6.1887e-07	-0.0408457	0.367922	-0.0897592	0.0475059	-0.19475	1.47297e-05	-0.156898	0.000503912	-0.299372	1.45977e-11	-0.268283	1.72163e-09	0.286111	1.20031e-10	0.000512426	0.990991	0.0951349	0.0356431	0.0327264	0.470731	-0.0364668	0.421524	-0.0141258	0.755599	-0.111653	0.0135909	0.0207624	0.647291	-0.0398502	0.379721	0.118857	0.00858301	-0.038063	0.401476
SBK1	blue	-0.284878	1.4521e-10	-0.121752	0.00708709	-0.0738149	0.103384	-0.0540142	0.233645	-0.0636461	0.160377	-0.0791322	0.0807512	-0.342438	7.14981e-15	-0.15092	0.000824111	-0.154215	0.00062977	-0.132909	0.00326542	-0.0511809	0.259125	-0.0742825	0.101211	0.196831	1.18732e-05	0.0557266	0.219132	0.328728	9.24253e-14	0.273637	7.89439e-10	0.194348	1.53527e-05	0.15604	0.000541371	0.074337	0.10096
MRM1	blue	-0.186327	3.44491e-05	-0.244022	4.77326e-08	-0.037947	0.402914	-0.114425	0.0114203	-0.236761	1.20824e-07	-0.159633	0.000399989	-0.373554	1.31815e-17	-0.224449	5.4548e-07	0.0144264	0.750569	-0.0723927	0.110221	-0.0197838	0.662866	-0.0817294	0.0712549	0.026508	0.559097	0.0132629	0.770097	-0.0856377	0.0587017	0.102137	0.0240461	-0.0368897	0.416156	0.16046	0.000372723	-0.0190224	0.675086
SOCS3	blue	0.209744	2.95951e-06	-0.126416	0.00516303	-0.0371678	0.412649	0.0371289	0.413139	0.0793545	0.0799002	0.00111938	0.980323	0.226719	4.1574e-07	0.234564	1.59108e-07	-0.0338564	0.455541	-0.023959	0.597506	-0.0542765	0.231379	-0.0254413	0.575026	-0.0596245	0.18853	-0.0506558	0.26405	-0.0442835	0.328953	-0.0840445	0.0635781	-0.0639829	0.158171	-0.0822899	0.0693301	-0.0139311	0.758863
RBBP8NL	blue	-0.20261	6.44655e-06	-0.201833	7.00515e-06	-0.0771039	0.0888592	-0.0393718	0.385472	-0.328702	9.28624e-14	-0.153168	0.000686388	-0.434015	7.78548e-24	-0.212404	2.19855e-06	0.0512951	0.258061	-0.0939388	0.0380382	0.119715	0.00811308	-0.0437474	0.334848	-0.0121972	0.788112	-0.0483259	0.286677	-0.0792531	0.0802876	-0.0531746	0.241003	0.0357775	0.43036	-0.0513104	0.257919	0.0446528	0.324931
ALG1L	blue	-0.0973622	0.0315239	-0.183498	4.54489e-05	0.00366393	0.935655	-0.0690112	0.127905	-0.199823	8.67315e-06	-0.123128	0.00646156	-0.314345	1.18377e-12	-0.226389	4.3259e-07	-0.0384841	0.396284	-0.00347701	0.938932	0.254516	1.18278e-08	-0.04112	0.364711	0.0279237	0.538296	0.0203933	0.653148	-0.0850931	0.0603326	0.0258164	0.5694	-0.0200801	0.658133	0.151672	0.000775423	-0.00529147	0.907182
C2CD4D	blue	-0.278332	3.92866e-10	-0.0946628	0.0365727	0.0107043	0.813536	-0.103806	0.0218208	-0.191849	1.98202e-05	-0.128515	0.0044619	-0.422491	1.50784e-22	-0.216207	1.42799e-06	-0.00465491	0.918306	-0.0587724	0.194936	-0.0237975	0.599979	-0.000266167	0.995321	-0.0101088	0.823735	0.00407515	0.928452	-0.0691183	0.127314	0.102049	0.0241687	-0.00775086	0.864392	0.190842	2.19471e-05	0.0368357	0.416839
CASKIN1	blue	-0.294736	3.08722e-11	-0.0434104	0.338588	0.000984167	0.982699	-0.0946355	0.036627	-0.102932	0.0229628	-0.0834355	0.0655285	-0.364375	9.07776e-17	-0.194066	1.58037e-05	-0.0717521	0.113414	-0.0717382	0.113485	-0.00963939	0.831795	-0.00851331	0.851201	0.0897851	0.0474415	0.0132723	0.769938	0.111341	0.0138567	0.205376	4.7823e-06	0.206486	4.23719e-06	0.229815	2.85747e-07	0.0456101	0.314656
ADCK5	blue	-0.165371	0.000243421	-0.190365	2.30293e-05	-0.0148819	0.742967	-0.054734	0.227464	-0.265773	2.46684e-09	-0.143393	0.00149343	-0.335123	2.84616e-14	-0.222862	6.58443e-07	-0.0258747	0.568528	-0.0644979	0.154842	-0.0357825	0.430295	-0.0837835	0.0644082	0.0526718	0.245487	-0.0366555	0.419124	-0.0539505	0.234198	0.0772725	0.0881614	-0.0335504	0.459627	0.0732333	0.106138	0.0840566	0.06354
CD33	blue	0.470194	3.27657e-28	0.031201	0.491671	-0.0358285	0.429702	0.00144077	0.974675	0.186978	3.23019e-05	0.191308	2.09381e-05	0.855122	9.20674e-141	0.351666	1.18723e-15	-0.0882467	0.0513867	-0.0567324	0.210915	-0.106389	0.0187297	-0.0356445	0.432077	-0.0587704	0.194951	-0.0717147	0.113603	-0.0529107	0.24335	-0.149442	0.000928232	-0.106797	0.018279	-0.250196	2.11662e-08	-0.0546654	0.228048
CARD16	blue	0.476299	5.29842e-29	-0.104704	0.0207003	-0.0490483	0.279526	0.0128036	0.777846	0.109751	0.0152834	0.0799847	0.0775273	0.560881	8.78973e-42	0.20746	3.80851e-06	0.0177445	0.695787	0.0616564	0.173882	-0.0471958	0.29811	0.0132181	0.770851	-0.0527149	0.2451	-0.00718129	0.874272	-0.0882	0.0515106	-0.175192	0.000100115	-0.141288	0.00175484	-0.178072	7.64373e-05	-0.0747443	0.0991007
PRKCQ	blue	0.176339	8.99541e-05	0.157897	0.000463356	-0.0198093	0.662458	0.043476	0.337857	-0.104518	0.020928	0.0715905	0.114231	0.259321	6.11268e-09	0.285628	1.29346e-10	-0.0702809	0.121023	-0.0505964	0.264611	0.0279037	0.538587	0.125585	0.00546687	-0.00102466	0.981987	0.0197476	0.663444	0.0732342	0.106134	0.021029	0.643073	-0.0264701	0.55966	-0.0981341	0.0301947	-0.087865	0.0524069
SIRPA	blue	0.466139	1.07747e-27	-0.0612429	0.176792	-0.0794755	0.07944	-0.0408159	0.368271	0.414945	9.88077e-22	0.287451	9.74946e-11	0.804455	5.21552e-112	0.412948	1.61196e-21	-0.0133654	0.76837	0.0395268	0.383603	-0.037374	0.410059	-0.00987676	0.827717	-0.0347288	0.444005	0.0570564	0.208316	0.115412	0.010725	-0.115988	0.0103367	-0.0743915	0.10071	-0.0648101	0.152851	-0.0441287	0.330648
SPDEF	blue	-0.0486865	0.283092	-0.185572	3.71089e-05	-0.059535	0.189196	-0.0517777	0.253604	-0.126244	0.00522446	-0.105481	0.0197706	-0.241524	6.59293e-08	-0.127244	0.0048754	0.098383	0.0297763	-0.0344817	0.447256	-0.0416018	0.359115	-0.0651592	0.150647	-0.0683425	0.13165	-0.0637141	0.15993	-0.0765991	0.0909757	-0.0988063	0.0290765	-0.102733	0.0232295	-0.00892098	0.844165	-0.0462924	0.307464
HVCN1	blue	0.571819	1.02463e-43	-0.0664447	0.142739	-0.10154	0.0248883	0.0260783	0.565489	0.127868	0.00466814	0.184741	4.02584e-05	0.756205	1.43853e-91	0.41657	6.61699e-22	-0.0560019	0.216861	-0.0183716	0.685598	0.0340296	0.453238	-0.0327884	0.469891	-0.0604782	0.182269	-0.0499935	0.270353	-0.049154	0.278489	-0.0989852	0.0287849	-0.0934644	0.0390251	-0.208995	3.21567e-06	-0.0253826	0.575908
TLR8	blue	0.436041	4.56912e-24	0.186924	3.24747e-05	0.151581	0.000781202	-0.0237319	0.600986	0.168055	0.000191868	0.20172	7.09012e-06	0.795718	6.64943e-108	0.248324	2.71477e-08	-0.101209	0.0253656	-0.0150648	0.739922	-0.064609	0.154132	-0.0207456	0.647557	-0.019819	0.662303	-0.03803	0.401885	-0.0319506	0.48132	-0.0569341	0.209294	-0.0574008	0.205579	-0.0600914	0.185086	-0.0607152	0.180558
GFRA2	blue	0.244154	4.69254e-08	0.0249501	0.582431	-0.0727463	0.108488	0.126515	0.00512785	0.0950581	0.0357928	0.52588	4.69365e-36	0.556265	5.47661e-41	0.552831	2.0967e-40	-0.0540885	0.233001	-0.0232732	0.60804	-0.0401318	0.37636	-0.0129854	0.774776	-0.0275456	0.543813	-0.00352397	0.938108	0.0192335	0.671688	-0.0517917	0.253475	-0.0206105	0.649698	-0.27673	4.99191e-10	-0.0473216	0.296822
GYG2	blue	-0.278396	3.89074e-10	-0.160906	0.000358754	-0.0682341	0.132265	-0.0400511	0.377321	-0.169813	0.000163852	-0.0405972	0.370846	-0.435593	5.14263e-24	-0.123511	0.00629661	-0.0525716	0.246388	-0.120189	0.00786322	-0.00755038	0.867867	-0.0127315	0.779065	-0.030688	0.498825	0.0204576	0.652126	0.0757644	0.0945633	-0.00169694	0.970174	0.131679	0.00356696	-0.0432714	0.340138	0.00330907	0.941876
LIPA	blue	0.368362	3.95579e-17	0.0353514	0.435874	0.00545431	0.904339	-0.0195362	0.666829	0.0869897	0.05481	0.137611	0.00231422	0.703801	3.46469e-74	0.444817	4.35679e-25	0.0826098	0.0682506	-0.0119992	0.791471	-0.0469725	0.300404	-0.0232261	0.608767	-0.0125288	0.782493	-0.0523703	0.248204	-0.040684	0.369823	-0.0454256	0.31662	-0.069735	0.123946	-0.232846	1.96934e-07	-0.0744643	0.100376
CEACAM21	blue	0.317406	6.95809e-13	-0.0572711	0.206606	0.00262328	0.953907	0.00570299	0.9	0.0703561	0.120625	0.0362867	0.423823	0.396466	8.0992e-20	0.187921	2.94159e-05	-0.0105222	0.816652	-0.0582029	0.199305	-0.0609266	0.179043	-0.0522839	0.248986	-0.0389338	0.390785	-0.0633146	0.16257	-0.0545278	0.229222	-0.0930533	0.0398981	-0.0934966	0.0389576	-0.219562	9.69466e-07	-0.0465887	0.304375
LPXN	blue	0.615718	2.95383e-52	0.064056	0.157695	-0.0272395	0.5483	0.0175231	0.699397	0.218982	1.03704e-06	0.152317	0.000735805	0.876598	1.72211e-156	0.383631	1.47484e-18	-0.0779116	0.0855556	-0.0286439	0.527863	-0.0890917	0.0491871	-0.0456614	0.314112	-0.0774268	0.0875263	-0.0817398	0.0712186	-0.0638801	0.158842	-0.122965	0.00653304	-0.119996	0.00796419	-0.220015	9.19633e-07	-0.0675447	0.136228
RTN1	blue	0.322999	2.59445e-13	0.036618	0.419601	-0.0342061	0.450898	0.0610338	0.178277	0.125356	0.00555345	0.262832	3.7419e-09	0.577491	9.53208e-45	0.277763	4.2785e-10	-0.104278	0.0212249	-0.0349163	0.441548	-0.0652446	0.150111	-0.0382013	0.399767	-0.0267813	0.555051	-0.0388485	0.391824	0.0757578	0.0945921	0.0209251	0.644716	-0.0682023	0.132446	-0.167657	0.000198803	-0.0409843	0.366298
IKBKE	blue	0.300276	1.25944e-11	-0.173106	0.000121401	0.0137216	0.762379	-0.0821787	0.0697084	0.058916	0.193845	-0.0631454	0.163698	0.222676	6.73045e-07	-0.112952	0.0125322	0.0467874	0.302315	0.0508045	0.262649	0.0801742	0.0768248	-0.0277398	0.540976	-0.104871	0.0204971	-0.0663247	0.143463	-0.0948451	0.0362112	-0.124804	0.00576686	-0.138261	0.0022047	0.0156709	0.729858	-0.0490735	0.279279
ZNF692	blue	-0.215469	1.55375e-06	-0.0993901	0.0281344	-0.0525479	0.246601	0.000248932	0.995624	-0.329375	8.2149e-14	-0.113907	0.0118014	-0.372287	1.72665e-17	-0.137479	0.00233692	-0.103597	0.022089	-0.110296	0.0147803	-0.0546282	0.228365	-0.0559158	0.217569	-0.00158766	0.972094	0.0170582	0.707	-0.0468712	0.301449	-0.00426181	0.925184	-0.0253114	0.576979	-0.0550069	0.225151	0.0514608	0.256525
P2RY14	blue	0.267449	1.94081e-09	0.266479	2.23027e-09	0.0428056	0.345367	0.0411218	0.36469	0.114934	0.0110573	0.153639	0.000660372	0.478432	2.77909e-29	0.362145	1.43724e-16	-0.0945983	0.0367013	-0.0547461	0.227361	-0.0910067	0.0444927	-0.0429526	0.343711	-0.0543486	0.230758	-0.0583769	0.197962	-0.0342422	0.450419	-0.122431	0.00677196	-0.0916561	0.0429887	-0.282929	1.95816e-10	-0.0789977	0.0812698
C1QA	blue	0.558178	2.57468e-41	-0.157326	0.00048614	-0.0326585	0.471654	-0.041773	0.357139	0.195346	1.38514e-05	0.0896983	0.0476572	0.808754	4.17192e-114	0.241948	6.24258e-08	-0.0930422	0.0399218	-0.0402637	0.374792	-0.0747052	0.0992779	-0.0202361	0.655648	-0.0161969	0.721161	-0.0496078	0.274071	-0.0484563	0.285378	-0.0761692	0.0928097	-0.0815175	0.0719937	0.00913294	0.840511	-0.0324861	0.473998
VASH1	blue	0.306966	4.15648e-12	0.0145213	0.748983	-0.0782329	0.0842689	0.0381465	0.400444	0.234225	1.65961e-07	0.145481	0.00126989	0.494599	1.79678e-31	0.503208	1.09664e-32	-0.100981	0.0256994	-0.0523171	0.248685	-0.088266	0.0513356	-0.0658144	0.146576	-0.0152626	0.736632	-0.0456979	0.313725	0.444706	4.49061e-25	0.00949033	0.834358	0.0216188	0.633785	-0.194215	1.55646e-05	-0.0434181	0.338502
ESRP1	blue	-0.255935	9.74636e-09	-0.055145	0.223987	0.0318644	0.482504	-0.15358	0.000663579	-0.241551	6.56966e-08	-0.18412	4.27757e-05	-0.422665	1.44326e-22	-0.356596	4.43957e-16	0.116314	0.0101226	0.00557017	0.902317	0.159039	0.000420704	0.00137569	0.975818	0.072516	0.109614	0.0174925	0.699896	-0.126564	0.00511029	0.0427384	0.346125	0.0554038	0.221818	0.2628	3.75891e-09	0.115316	0.0107915
PIAS3	blue	-0.0689306	0.128353	-0.141572	0.00171736	-0.105636	0.0195893	-0.0190336	0.674906	-0.127946	0.00464282	-0.121017	0.00744311	-0.278539	3.80801e-10	-0.187702	3.00627e-05	-0.10658	0.0185175	-0.0147795	0.744674	-0.0372719	0.41134	-0.0707833	0.118381	-0.0542432	0.231666	-0.0678656	0.134372	-0.0417935	0.356902	-0.076099	0.0931119	-0.0682927	0.131932	-0.0471948	0.29812	0.0931464	0.0396989
TYROBP	blue	0.479682	1.9003e-29	-0.183508	4.5403e-05	-0.0974406	0.0313867	-0.0366148	0.419641	0.151752	0.000770418	0.0561456	0.215682	0.712629	7.70142e-77	0.222408	6.94651e-07	-0.0462408	0.308005	-0.0522018	0.249731	-0.0838905	0.0640668	-0.0395882	0.382864	-0.0283399	0.532254	-0.0597074	0.187915	-0.0562917	0.214488	-0.109757	0.0152778	-0.0976459	0.0310296	-0.0970447	0.0320849	-0.0416539	0.358513
ADAM8	blue	0.22237	6.97811e-07	-0.130356	0.0039193	0.0175083	0.699638	-0.0203867	0.653253	0.133102	0.00322021	-0.0558206	0.218355	0.212819	2.09838e-06	-0.0590953	0.19249	0.017485	0.700019	0.0252545	0.577836	-0.0548728	0.226285	-0.0326748	0.471432	-0.0919409	0.042343	-0.0733301	0.105675	-0.0430807	0.342273	-0.163251	0.000293004	-0.106369	0.018753	0.0198104	0.662441	-0.0427327	0.34619
APOL3	blue	0.595882	3.10723e-48	-0.0145067	0.749228	-0.0585121	0.196923	0.0140762	0.756431	0.0865691	0.055997	0.18213	5.18882e-05	0.636866	7.1531e-57	0.297547	1.96364e-11	-0.00117481	0.979348	0.0172202	0.704347	-0.0441609	0.330295	0.0233775	0.606433	-0.0645461	0.154534	-0.0574124	0.205487	-0.0634826	0.161456	-0.0840903	0.0634336	-0.101257	0.0252957	-0.0747146	0.0992356	-0.0719942	0.112199
ABCB6	blue	-0.28384	1.70341e-10	-0.116408	0.0100615	0.00690488	0.879073	-0.0931343	0.0397247	-0.236112	1.31094e-07	-0.0927759	0.0404962	-0.398401	5.17109e-20	-0.170452	0.00015466	-0.00735561	0.871246	-0.0234616	0.605138	-0.00131096	0.976956	0.11978	0.00807845	0.0398039	0.380275	0.0397668	0.38072	-0.0182762	0.687145	0.38467	1.17146e-18	0.0197891	0.662781	0.230435	2.64906e-07	0.00933155	0.83709
TBX15	blue	-0.189821	2.43257e-05	-0.00975921	0.829736	0.0799843	0.0775285	-0.0949616	0.035982	6.31648e-05	0.99889	-0.0720844	0.111749	-0.263619	3.34891e-09	-0.131466	0.0036216	0.00666986	0.883159	-0.0814265	0.072313	-0.0357301	0.430972	-0.0592919	0.191011	-0.0131934	0.771268	-0.0302384	0.505138	0.0491408	0.278619	0.0308953	0.495927	-0.0202322	0.655711	0.0362785	0.423927	0.0248509	0.583932
FGD3	blue	0.473794	1.12403e-28	0.0110937	0.806884	-0.0590836	0.192578	0.0817566	0.0711603	0.0155978	0.731068	0.145781	0.00124043	0.614579	5.11762e-52	0.435071	5.89935e-24	-0.106588	0.0185082	-0.0544109	0.230224	-0.0415948	0.359195	-0.0112971	0.803416	-0.0502538	0.267864	-0.0564419	0.213265	-0.0556452	0.219807	-0.0526129	0.246016	-0.0230265	0.61185	-0.264637	2.89914e-09	0.00740999	0.870302
ASAH2B	blue	-0.233691	1.7735e-07	0.180725	5.93899e-05	-0.00677424	0.881344	-0.0981129	0.0302306	-0.186762	3.29991e-05	-0.10412	0.021423	-0.345144	4.24867e-15	-0.184738	4.02699e-05	0.00432326	0.924109	-0.0428644	0.344704	-0.0280587	0.536332	0.0551156	0.224234	-0.0513327	0.257712	-0.0457762	0.312896	-0.0535308	0.237862	0.0617711	0.173081	0.0232194	0.60887	0.178548	7.30749e-05	-0.0418706	0.356015
LGSN	blue	-0.207712	3.70446e-06	0.148687	0.000985963	0.0930189	0.0399718	-0.062866	0.165574	-0.14608	0.00121171	-0.0712048	0.1162	-0.284185	1.61537e-10	-0.0937959	0.0383332	-0.0444852	0.326753	-0.0906779	0.0452708	-0.0538635	0.234954	-0.0210424	0.642862	-0.0417802	0.357056	-0.038157	0.400315	-0.0706066	0.119305	0.0019356	0.965981	-0.0183641	0.685721	-0.0342483	0.450339	-0.0132111	0.770969
SLCO2B1	blue	0.447611	2.03194e-25	0.045774	0.312918	-0.0120935	0.789871	-0.00486217	0.914683	0.273709	7.81035e-10	0.148907	0.000968813	0.842179	1.82826e-132	0.452135	5.82307e-26	-0.0366634	0.419025	-0.0538443	0.235121	-0.0923066	0.0415256	-0.0294144	0.516817	-0.0550982	0.224381	-0.0648282	0.152736	-0.0341105	0.452165	-0.0889515	0.0495466	-0.0920991	0.0419878	-0.234425	1.61887e-07	-0.0456616	0.31411
ETS1	blue	0.380931	2.67227e-18	0.232943	1.9458e-07	0.00696532	0.878023	0.0341234	0.451993	0.403617	1.52075e-20	0.151569	0.00078197	0.555205	8.30209e-41	0.453817	3.6411e-26	-0.0349343	0.441311	0.0764427	0.0916393	-0.0366247	0.419516	-0.0193182	0.670328	-0.0690694	0.127583	-0.0506781	0.26384	0.0263663	0.561201	-0.083332	0.0658648	-0.070351	0.120652	-0.107029	0.0180266	-0.0575145	0.204681
IL18R1	blue	0.151949	0.0007582	0.354852	6.29995e-16	0.163674	0.000282421	0.0303102	0.504127	0.199361	9.10671e-06	0.0685181	0.130659	0.367805	4.44567e-17	0.15244	0.000728455	0.0480046	0.289897	0.0804912	0.0756617	0.0354532	0.434553	0.0232141	0.608951	-0.0184092	0.684989	-0.0274929	0.544584	-0.0266634	0.556796	-0.0806955	0.0749197	-0.055562	0.220499	0.105569	0.0196676	-0.0421859	0.352402
TSPAN12	blue	-0.15729	0.00048762	-0.0082162	0.856337	0.0176154	0.697891	-0.0689464	0.128265	-0.156369	0.000526708	-0.0588304	0.194494	-0.153813	0.000650958	0.05256	0.246492	0.0791362	0.080736	-0.119636	0.00815514	-0.0774212	0.0875493	-0.0726514	0.108951	0.0780927	0.0848283	-0.0563631	0.213906	-0.0532516	0.240322	0.0572307	0.206927	0.0538456	0.23511	-0.10202	0.0242095	-0.00452078	0.920653
PTGDS	blue	0.416175	7.29501e-22	-0.0872862	0.0539859	-0.115909	0.0103898	0.142895	0.00155185	0.0416523	0.358531	0.146174	0.00120279	0.469018	4.63531e-28	0.53864	4.58112e-38	-0.0816849	0.0714094	-0.0902515	0.0462969	-0.0607577	0.180252	-0.0173855	0.701644	-0.0366351	0.419383	-0.0524554	0.247435	-0.0310439	0.493856	-0.043464	0.337992	-0.0659093	0.145993	-0.366111	6.33149e-17	-0.0445632	0.325904
FOXP3	blue	0.570569	1.71888e-43	-0.148427	0.00100656	-0.155997	0.000543312	-0.0466215	0.304034	0.240572	7.44877e-08	0.00225365	0.960396	0.511733	6.35411e-34	0.105251	0.0200419	-0.108048	0.016953	-0.0373283	0.410632	0.00223382	0.960744	-0.0508556	0.262168	-0.070147	0.121736	-0.0464622	0.305691	-0.0523509	0.248379	-0.0602639	0.183826	-0.0996009	0.0278008	-0.10221	0.0239449	-0.0421874	0.352384
CLK2	blue	-0.202232	6.7129e-06	-0.056822	0.210194	-0.0178626	0.693864	-0.0652732	0.149932	-0.294469	3.22178e-11	-0.113986	0.0117423	-0.325725	1.59208e-13	-0.213002	2.05552e-06	-0.11431	0.0115041	-0.121224	0.00734136	-0.0835652	0.0651089	-0.0272578	0.548031	-0.00317734	0.944186	0.0519466	0.252056	-0.0198741	0.661423	0.0889883	0.0494521	-0.0177258	0.696092	0.061816	0.172768	0.0740168	0.102441
THEMIS2	blue	0.413023	1.58267e-21	-0.00558361	0.902083	0.00082054	0.985575	-0.00554914	0.902684	0.211002	2.57274e-06	0.121175	0.00736531	0.659998	2.36466e-62	0.311341	1.98229e-12	-0.157213	0.000490767	-0.0675861	0.135987	-0.0899667	0.0469932	-0.0679438	0.133923	-0.0482094	0.287842	-0.0587234	0.195309	-0.0363347	0.423209	0.00240723	0.957699	-0.0659844	0.145533	-0.0922475	0.0416568	-0.00914823	0.840248
CLEC12A	blue	0.22083	8.36129e-07	0.0827017	0.0679432	-0.00211518	0.962827	-0.00424876	0.925413	-0.0123515	0.785496	0.0957028	0.0345516	0.493777	2.33712e-31	0.187134	3.18073e-05	-0.0343245	0.44933	-0.0242799	0.592606	-0.0230621	0.6113	-0.0268207	0.55447	0.0261248	0.564796	0.408176	5.12458e-21	-0.0399804	0.378165	-0.0559106	0.217612	-0.0543928	0.230379	-0.102519	0.0235206	-0.0414044	0.361401
KCNJ5	blue	0.186047	3.54137e-05	-0.00652097	0.885749	-0.0591752	0.191888	0.0166066	0.714412	-0.0368568	0.416573	0.0816189	0.0716395	0.352152	1.07836e-15	0.373443	1.34963e-17	0.0992545	0.0283509	-0.0428352	0.345033	-0.0322506	0.47721	-0.00802737	0.859604	-0.0108056	0.811805	-0.0278388	0.539531	-0.0156158	0.730771	-0.0432993	0.339827	-0.0393249	0.386039	-0.249754	2.24537e-08	0.00237009	0.958351
DECR2	blue	-0.0910818	0.0443165	-0.244965	4.2217e-08	-0.11043	0.014659	-0.0874207	0.0536155	-0.280337	2.90414e-10	-0.103635	0.0220408	-0.288864	7.82115e-11	-0.177148	8.33852e-05	0.0835452	0.0651735	-0.124537	0.00587315	-0.0746723	0.0994276	-0.0822759	0.0693776	-0.0777461	0.0862243	-0.0729858	0.107327	-0.125676	0.00543266	-0.015092	0.739469	-0.105053	0.020278	-0.0682763	0.132025	-0.0423745	0.350251
ARHGAP30	blue	0.608177	1.07844e-50	0.0165222	0.715801	-0.0567298	0.210936	0.0762028	0.0926652	0.121627	0.00714645	0.16673	0.000215875	0.817003	2.77293e-118	0.448841	1.44948e-25	-0.0955499	0.0348425	-0.0542234	0.231836	-0.0755194	0.0956375	-0.0430722	0.342368	-0.0844762	0.0622252	-0.0670799	0.13895	-0.0685594	0.130426	-0.0991335	0.0285452	-0.107165	0.0178793	-0.291449	5.20817e-11	-0.0535478	0.237712
VIM	blue	0.276561	5.11955e-10	-0.0986891	0.0292689	-0.0768965	0.0897237	-0.0112049	0.804987	0.492977	3.01643e-31	0.170422	0.00015508	0.430453	1.96987e-23	0.3226	2.78526e-13	-0.112485	0.0129047	0.0446631	0.32482	-0.0647686	0.153115	-0.0244436	0.590112	-0.0466038	0.304218	-0.0492777	0.27728	0.175297	9.91411e-05	-0.121949	0.00699467	-0.00779796	0.863576	-0.0696142	0.1246	-0.0455006	0.315821
KCNAB2	blue	0.462936	2.72758e-27	-0.0626896	0.166767	-0.111457	0.0137572	0.053562	0.237588	0.0276885	0.541725	0.136975	0.00242591	0.706483	5.54549e-75	0.44189	9.61481e-25	-0.0457115	0.313581	-0.0825741	0.0683706	-0.0900462	0.0467979	-0.0376716	0.406339	-0.0362189	0.42469	-0.0369366	0.415564	-0.0406544	0.370172	0.0728348	0.108058	-0.080173	0.0768294	-0.17934	6.7782e-05	-0.0139907	0.757864
SRPK3	blue	-0.169294	0.00017169	-0.0690772	0.127541	0.0709126	0.117709	-0.0213289	0.638343	-0.0881079	0.0517557	-0.0948272	0.0362465	-0.274054	7.42387e-10	-0.162795	0.000304844	-0.108775	0.0162211	-0.103448	0.0222829	-0.0467321	0.302888	-0.0707415	0.1186	0.0034793	0.938891	-0.0407104	0.369511	-0.0351752	0.438167	0.142953	0.00154496	-0.0114827	0.800253	0.0483792	0.286145	0.0825809	0.0683478
GOLGA7B	blue	-0.128156	0.00457546	-0.0681765	0.132593	-0.0426419	0.347216	-0.0700909	0.122035	-0.0654993	0.148523	-0.0884256	0.0509143	-0.211475	2.44024e-06	-0.122643	0.00667627	-0.0786264	0.0827148	-0.101817	0.024494	-0.0535758	0.237467	-0.0809425	0.0740307	-0.0152365	0.737066	-0.0527593	0.244703	-0.0516793	0.254508	0.146333	0.00118783	-0.0331274	0.46531	0.00412892	0.927511	0.0314682	0.487968
C1QB	blue	0.533602	2.91717e-37	-0.1336	0.00310625	-0.0233504	0.606851	-0.0472531	0.297523	0.177993	7.70118e-05	0.126952	0.00497513	0.813594	1.56451e-116	0.243619	5.03013e-08	-0.0944651	0.0369681	-0.0362467	0.424334	-0.069706	0.124103	-0.019632	0.665296	-0.00479331	0.915886	-0.0432509	0.340367	-0.0424327	0.349589	-0.0632165	0.163223	-0.0707066	0.118782	0.0110773	0.807164	-0.0298952	0.509986
MNDA	blue	0.517433	9.0412e-35	-0.00637562	0.888279	0.01439	0.751178	-0.014393	0.751127	0.205993	4.47161e-06	0.124078	0.00605918	0.849025	9.32917e-137	0.289476	7.10552e-11	-0.109404	0.0156117	-0.0285631	0.529028	-0.0935058	0.0389383	-0.0467632	0.302565	-0.0711571	0.116445	-0.0778646	0.085745	-0.0624658	0.168289	-0.160341	0.000376541	-0.116488	0.0100099	-0.221027	8.1705e-07	-0.0785418	0.083047
CCL2	blue	0.297471	1.98779e-11	-0.0779508	0.0853976	-0.074442	0.100478	0.0172404	0.704016	0.298085	1.79966e-11	0.0439447	0.332671	0.456979	1.49548e-26	0.145415	0.00127643	-0.0601082	0.184963	-0.0392814	0.386565	-0.0627642	0.166261	0.00426448	0.925138	-0.0242695	0.592764	-0.0319988	0.480658	0.121433	0.00724001	-0.10605	0.0191123	-0.0434298	0.338372	-0.0103267	0.819999	-0.0149733	0.741445
CLPSL2	blue	-0.112729	0.0127088	-0.0879738	0.0521145	-0.0258032	0.569597	-0.0558429	0.218171	-0.15793	0.000462054	-0.0603291	0.183351	-0.208919	3.24279e-06	-0.0443974	0.327709	-0.0589988	0.193219	-0.053047	0.242136	-0.0320226	0.480332	-0.0153981	0.734382	-0.0080669	0.85892	0.022741	0.616271	-0.0427185	0.34635	-0.0183946	0.685227	-0.0178008	0.69487	0.00833662	0.854254	-0.0129823	0.774829
TMEM62	blue	-0.0884147	0.050943	-0.0670772	0.138966	0.0542921	0.231245	-0.130533	0.00387027	-0.184858	3.98003e-05	-0.138638	0.00214352	-0.194174	1.56296e-05	-0.21194	2.31638e-06	0.239946	8.06922e-08	-0.120787	0.00755766	-0.0679327	0.133987	-0.0558436	0.218165	-0.0786001	0.0828179	-0.08499	0.0606455	-0.125258	0.00559081	-0.0578033	0.202413	0.00813056	0.857818	-0.0362343	0.424492	-0.051532	0.255867
ATAT1	blue	-0.283932	1.67941e-10	-0.0354616	0.434445	-0.117062	0.00964646	0.0215869	0.634287	-0.237856	1.05234e-07	-0.0883439	0.0511296	-0.373442	1.34991e-17	-0.134004	0.00301663	-0.109185	0.015821	-0.11325	0.0122997	-0.0543971	0.230343	-0.0496867	0.273307	0.0784642	0.0833525	0.0941068	0.0376936	0.171576	0.000139648	0.107005	0.0180518	0.0528692	0.24372	0.0484102	0.285837	0.0501869	0.268502
ARRDC4	blue	0.125218	0.00560617	0.119665	0.00813972	-0.00744095	0.869765	0.0887907	0.0499616	0.0836803	0.0647388	0.224901	5.16876e-07	0.374626	1.04794e-17	0.317011	7.4551e-13	0.363471	1.09412e-16	0.124529	0.00587613	-0.0211841	0.640625	0.0710705	0.116892	-0.0400011	0.377917	0.00436202	0.92343	-0.0460455	0.310054	-0.0527356	0.244915	-0.0965796	0.0329222	-0.28461	1.5133e-10	-0.0683524	0.131594
EVI2B	blue	0.589231	6.0142e-47	0.169412	0.000169874	-0.108722	0.0162736	0.0225357	0.61946	0.22676	4.13707e-07	0.175584	9.65277e-05	0.818443	4.92241e-119	0.393642	1.55063e-19	-0.0647043	0.153523	-0.0192029	0.67218	-0.0790596	0.0810306	-0.0469887	0.300237	-0.0664833	0.142507	-0.0362853	0.423841	-0.0652589	0.150022	-0.11743	0.00941932	-0.118092	0.00902263	-0.294567	3.1721e-11	-0.0480258	0.289684
DERL3	blue	0.321165	3.5937e-13	-0.117176	0.00957547	-0.067109	0.138779	0.0149653	0.741577	0.265879	2.42957e-09	-0.0244684	0.589736	0.247617	2.98079e-08	0.0597138	0.187867	-0.0746618	0.0994751	-0.0304035	0.502814	-0.0641953	0.156792	-0.0722901	0.110727	-0.0208733	0.645535	-0.0278442	0.539453	-0.0347153	0.444182	0.0126851	0.779849	-0.0614075	0.175629	-0.104881	0.0204845	0.0114652	0.800551
PIK3R5	blue	0.429477	2.53558e-23	0.155007	0.000589868	-0.0142783	0.753047	0.074084	0.102129	0.147687	0.00106754	0.216735	1.34404e-06	0.800684	3.26951e-110	0.508505	1.8861e-33	-0.0949984	0.0359097	-0.0421295	0.353047	-0.0574383	0.205282	-0.0271927	0.548989	0.0264376	0.560142	-0.0304729	0.501839	-0.033554	0.45958	-0.0280354	0.53667	-0.0422797	0.351332	-0.248164	2.77299e-08	-0.0429721	0.343492
MS4A14	blue	0.192872	1.78588e-05	0.272314	9.58721e-10	-0.050272	0.26769	0.151945	0.000758396	0.0589157	0.193848	0.282444	2.10872e-10	0.529182	1.44367e-36	0.488399	1.28234e-30	-0.0992249	0.0283983	-0.0268697	0.553747	-0.0630373	0.164422	-0.0084278	0.852678	-0.0342464	0.450364	-0.0403865	0.373336	-0.0254458	0.574958	-0.0631295	0.163804	-0.0563818	0.213754	-0.23719	1.14472e-07	-0.0237491	0.600721
ARHGEF19	blue	-0.176621	8.76127e-05	-0.185093	3.88936e-05	-0.0995134	0.0279389	-0.00536652	0.905872	-0.208449	3.41589e-06	-0.100427	0.0265256	-0.337323	1.88569e-14	-0.112809	0.0126452	-0.192217	1.90922e-05	-0.0973937	0.0314687	0.0625071	0.168008	-0.0938995	0.0381192	0.0383608	0.397801	0.0578889	0.201744	0.0297752	0.511686	-0.041752	0.35738	0.189524	2.50618e-05	-0.100697	0.0261194	0.0577036	0.203194
AL049634.2	blue	0.161146	0.000351439	0.217677	1.20598e-06	0.069319	0.12621	-0.00869165	0.848121	0.0649936	0.15169	0.0790504	0.0810664	0.45216	5.78232e-26	0.28707	1.03451e-10	-0.0403904	0.37329	-0.0460398	0.310114	-0.0606107	0.181311	-0.0120778	0.790136	-0.00657089	0.884881	-0.035152	0.438469	-0.0219414	0.628729	-0.0497066	0.273116	-0.0493742	0.276339	-0.096465	0.0331314	-0.0371959	0.412296
NET1	blue	-0.0710684	0.116902	-0.0461626	0.308824	-0.0164357	0.717226	-0.0895664	0.0479864	-0.00913687	0.840443	-0.102545	0.023484	-0.174482	0.000106929	-0.180017	6.35493e-05	0.0481653	0.288284	0.0758628	0.0941346	0.0197591	0.663261	-0.0695137	0.125147	-0.0631865	0.163424	-0.0348981	0.441786	-0.0351511	0.438481	-0.0699488	0.122795	0.015798	0.727753	0.108346	0.0166495	-0.00965575	0.831514
FCN1	blue	0.212638	2.14146e-06	0.000383301	0.993261	0.0459254	0.311319	0.0194467	0.668265	0.0889967	0.0494303	0.293918	3.51826e-11	0.491563	4.72737e-31	0.201498	7.26053e-06	-0.0812622	0.0728924	-0.0507157	0.263485	-0.0698419	0.123369	-0.0247955	0.584771	-0.034594	0.445777	-0.0427578	0.345906	-0.0283602	0.531961	-0.101863	0.0244294	-0.06687	0.140194	-0.188089	2.8929e-05	-0.0415057	0.360227
URB1	blue	-0.205523	4.70672e-06	0.0375934	0.407315	0.0794395	0.079577	0.0166978	0.712914	-0.126969	0.00496908	-0.0402063	0.375474	-0.270479	1.25293e-09	-0.084778	0.0612931	-0.0265672	0.558221	0.0298979	0.509947	-0.00530395	0.906964	0.0137481	0.761935	-0.0173658	0.701965	-0.00904873	0.841962	-0.0403836	0.373371	-0.0560339	0.216598	-0.00857303	0.850169	0.0674791	0.13661	-0.0208619	0.645716
KRTAP4-1	blue	-0.0192623	0.671226	-0.104906	0.0204547	-0.0403693	0.37354	-0.0720172	0.112084	-0.0402233	0.375272	-0.0582339	0.199065	-0.172121	0.000132872	-0.141937	0.00167008	-0.0379411	0.402987	-0.0213621	0.637821	0.0203119	0.654442	-0.0158721	0.726527	-0.0265621	0.558295	-0.0172088	0.704534	-0.0438209	0.334035	-0.0131405	0.77216	-6.81332e-05	0.998802	0.0690496	0.127693	0.0519424	0.252095
DHTKD1	blue	-0.289926	6.62137e-11	-0.05492	0.225886	0.148029	0.00103897	-0.1018	0.024518	-0.234375	1.62892e-07	-0.115305	0.0107984	-0.385112	1.06206e-18	-0.194575	1.49975e-05	-0.0668425	0.140357	-0.0758587	0.0941526	0.0464615	0.305698	-0.00844041	0.852461	-0.0152554	0.736752	0.0101448	0.823117	-0.0817579	0.0711561	0.0178869	0.693468	0.0231451	0.610017	0.157968	0.000460569	-0.00730198	0.872177
LY86	blue	0.480024	1.71162e-29	-0.0984627	0.0296435	-0.0590646	0.192721	0.0297967	0.511381	0.143077	0.00153023	0.116437	0.0100433	0.749419	4.4746e-89	0.378009	5.05245e-18	-0.049398	0.276108	-0.0284931	0.530039	-0.0787522	0.0822229	-0.047573	0.294261	-0.0701535	0.121701	-0.0736199	0.104301	-0.0638782	0.158854	-0.142767	0.00156711	-0.121702	0.00711111	-0.31204	1.75919e-12	-0.0597329	0.187726
SLC2A9	blue	0.317271	7.12503e-13	0.0465061	0.305234	0.0126757	0.780009	0.129097	0.00428361	0.399381	4.11618e-20	0.165605	0.000238459	0.64895	1.12502e-59	0.368455	3.87935e-17	-0.0146385	0.747026	0.315992	8.90181e-13	0.0562929	0.214478	-0.0185464	0.682769	-0.00540305	0.905234	0.123057	0.00649261	0.0276685	0.542016	-0.0903628	0.0460271	-0.07822	0.0843204	-0.154093	0.000636158	-0.0416333	0.35875
CREB3L4	blue	-0.201006	7.65055e-06	-0.201352	7.37426e-06	-0.017997	0.691677	-0.0612691	0.176607	-0.243463	5.13291e-08	-0.120332	0.00778907	-0.37472	1.02695e-17	-0.201764	7.0571e-06	0.0230002	0.612257	-0.105158	0.0201525	-0.0614106	0.175608	-0.0669998	0.139424	0.0991328	0.0285463	0.0707629	0.118488	-0.0447186	0.324219	0.0096823	0.831058	-0.0550197	0.225043	0.0562189	0.215082	-0.0281022	0.5357
PTPRO	blue	0.38621	8.31658e-19	0.126861	0.00500655	0.0941195	0.0376677	-0.0123722	0.785145	0.253056	1.4417e-08	0.140955	0.00179985	0.803762	1.12424e-111	0.291142	5.46693e-11	-0.0783324	0.0838737	-0.0336673	0.458064	-0.0832407	0.0661624	-0.0389931	0.390063	-0.00884261	0.845516	-0.0540141	0.233646	0.0514137	0.256961	-0.0371278	0.413152	-0.0916484	0.0430065	-0.148348	0.00101289	-0.0631202	0.163867
EMILIN2	blue	0.290466	6.08191e-11	-0.00188223	0.966919	0.0630436	0.16438	-0.0489557	0.280436	0.298578	1.66117e-11	0.205472	4.73269e-06	0.65973	2.75432e-62	0.284743	1.48271e-10	-0.0669369	0.139796	-0.019433	0.668485	-0.0517799	0.253583	0.141815	0.0016858	-0.0405244	0.371705	-0.0173368	0.702439	0.00895015	0.843662	-0.0875986	0.0531288	0.0433142	0.33966	-0.0216307	0.633599	-0.0317909	0.483515
TSTA3	blue	-0.0499809	0.270474	-0.282421	2.11626e-10	-0.0319268	0.481646	-0.102413	0.0236654	-0.227744	3.67409e-07	-0.144976	0.00132093	-0.291235	5.38746e-11	-0.176924	8.51612e-05	0.172736	0.000125596	0.0815757	0.0717901	-0.0251898	0.578812	-0.0671272	0.138671	-0.0603821	0.182966	-0.0614739	0.175162	-0.0814547	0.0722141	-0.0968659	0.0324046	-0.0805176	0.0755657	-0.0100004	0.825594	-0.0433203	0.339593
DAB2	blue	0.278565	3.79364e-10	0.186006	3.55553e-05	-0.0684644	0.130961	0.0221144	0.626025	0.443391	6.41365e-25	0.396327	8.36328e-20	0.70785	2.16355e-75	0.531284	6.76827e-37	0.017956	0.692344	0.0577914	0.202506	-0.0661701	0.144401	0.0519469	0.252054	-0.0633865	0.162092	-0.0444927	0.326671	0.020452	0.652215	-0.10021	0.0268559	0.0344836	0.44723	-0.259867	5.66639e-09	-0.0312853	0.490501
PROK2	blue	-0.0163423	0.718763	0.0707785	0.118407	0.0202456	0.655497	0.0251495	0.579419	0.0767104	0.0905055	0.0361272	0.425864	0.166543	0.00021949	0.0842881	0.0628118	-0.0197138	0.663986	0.0202068	0.656115	-0.0105627	0.815958	-0.00446505	0.921628	0.0554006	0.221844	0.00384994	0.932396	0.0628046	0.165989	-0.0057107	0.899866	0.0584557	0.197357	0.124598	0.0058488	-0.0180639	0.69059
ICA1	blue	-0.329037	8.73683e-14	-0.0529367	0.243118	0.0639176	0.158597	-0.102325	0.0237862	-0.224033	5.73148e-07	-0.132093	0.00346276	-0.464974	1.51189e-27	-0.198974	9.48617e-06	0.111134	0.0140353	-0.118845	0.00858983	-0.0740956	0.102075	-0.0159393	0.725416	-0.013892	0.759519	-0.0468882	0.301273	-0.0374937	0.40856	0.410577	2.87021e-21	0.07108	0.116843	0.121777	0.00707532	0.0886141	0.0504204
NQO1	blue	-0.155875	0.000548861	-0.12739	0.00482616	0.0537192	0.236212	-0.082846	0.0674627	-0.226107	4.47484e-07	-0.094565	0.0367678	-0.301991	9.50497e-12	-0.129406	0.00419149	0.124278	0.00597751	-0.0549308	0.225794	-0.0087653	0.84685	0.0146532	0.74678	-0.0285246	0.529584	-0.0159523	0.725201	-0.0781607	0.0845566	0.127305	0.00485469	-0.0399722	0.378263	0.136544	0.00250449	0.00209713	0.963144
SOX12	blue	-0.255171	1.08189e-08	-0.198525	9.94447e-06	-0.096894	0.0323541	-0.119036	0.00848295	-0.146876	0.0011382	-0.103018	0.0228475	-0.385841	9.0297e-19	-0.217058	1.29512e-06	-0.182675	4.92233e-05	-0.0807379	0.0747664	0.0776217	0.0867296	-0.0406908	0.369743	0.0911884	0.0440675	0.121716	0.0071041	0.0948503	0.036201	0.164729	0.000257542	0.27651	5.1584e-10	0.313695	1.32412e-12	0.0886507	0.050325
DCST2	blue	-0.143691	0.00145941	0.0173424	0.702349	-0.0438686	0.333509	0.00814983	0.857485	-0.201199	7.49516e-06	-0.0807253	0.0748119	-0.220541	8.64883e-07	-0.141436	0.00173523	-0.0746123	0.0997002	-0.0471789	0.298283	-0.039413	0.384975	0.0141536	0.755134	-0.0423155	0.350924	-0.0262857	0.5624	-0.0731008	0.106773	-0.0491161	0.278861	-0.0235768	0.603367	-0.0127453	0.778832	0.0463663	0.306692
DDIT4L	blue	-0.0972081	0.0317952	-0.0435985	0.336497	0.0309503	0.495161	-0.0759306	0.0938403	-0.103933	0.021659	-0.0552473	0.223128	-0.195401	1.37719e-05	-0.0587578	0.195046	-0.064191	0.15682	-0.0778086	0.0859711	-0.0402832	0.374561	-0.0376576	0.406513	-0.0300368	0.507982	-0.0380822	0.40124	-0.0554017	0.221835	-0.0442721	0.329078	-0.0108069	0.811783	0.0237621	0.600522	-0.0142891	0.752866
PRR36	blue	-0.267753	1.85803e-09	-0.165002	0.000251448	-0.0936318	0.0386745	-0.0878375	0.0524811	-0.178036	7.66933e-05	-0.126155	0.00525674	-0.41073	2.76596e-21	-0.226462	4.28783e-07	-0.126034	0.00530073	-0.144371	0.00138456	-0.0596627	0.188246	-0.0559619	0.21719	0.118393	0.00884769	0.0198853	0.661243	0.0033076	0.941902	0.269326	1.48092e-09	0.0611622	0.177364	0.095308	0.0353073	0.0997043	0.0276384
FGL1	blue	-0.152913	0.000700837	-0.0539021	0.234618	0.0472004	0.298062	-0.0801585	0.076883	-0.101899	0.0243789	-0.0582154	0.199208	-0.2194	9.87927e-07	-0.100341	0.0266566	0.0143828	0.751298	-0.0709082	0.117732	-0.0238925	0.598524	-0.0371237	0.413204	0.00312728	0.945064	-0.00867609	0.84839	-0.0305682	0.500503	0.159227	0.000414035	-0.015041	0.740318	0.103076	0.0227716	0.0269298	0.552859
MESP1	blue	-0.131415	0.00363488	-0.148098	0.00103328	-0.0114508	0.800797	0.0171501	0.705494	-0.21033	2.77313e-06	-0.0784935	0.083237	-0.248051	2.81458e-08	-0.137827	0.00227735	-0.123241	0.00641251	-0.0968056	0.032513	-0.057741	0.2029	-0.0556663	0.219632	-0.0233476	0.606893	-0.0499668	0.27061	-0.0570706	0.208202	-0.0762468	0.0924764	-0.0456961	0.313744	-0.0758048	0.0943873	0.00124914	0.978042
FAM155B	blue	-0.154091	0.000636228	-0.104444	0.0210192	-0.0593078	0.190892	-0.0194854	0.667644	-0.0874216	0.053613	-0.0501595	0.268764	-0.170945	0.000147899	-0.100798	0.0259703	0.111235	0.0139486	0.00902094	0.842441	0.021574	0.63449	-0.0399072	0.379038	0.0381774	0.400063	0.0240448	0.596193	0.0258156	0.569412	0.229028	3.14473e-07	-0.0325816	0.472698	-0.0114066	0.801549	-0.0516722	0.254574
ATAD3B	blue	-0.201238	7.46387e-06	-0.0460446	0.310063	0.207886	3.63419e-06	-0.0100593	0.824584	-0.192383	1.87721e-05	-0.118342	0.00887714	-0.260541	5.1583e-09	-0.18581	3.62491e-05	-0.112435	0.0129451	-0.0680928	0.13307	-0.0419959	0.354576	-0.00860824	0.849561	0.00871523	0.847714	0.00466196	0.918183	-0.0151083	0.739198	0.0365357	0.420647	0.10324	0.0225545	0.218019	1.15934e-06	0.0465283	0.305003
RHPN1	blue	-0.129219	0.00424681	-0.127439	0.0048098	-0.0205999	0.649867	0.058098	0.200117	-0.256525	8.98968e-09	-0.120533	0.00768597	-0.295431	2.76191e-11	-0.178254	7.51339e-05	-0.086446	0.0563486	-0.113499	0.0121085	-0.0547198	0.227585	-0.0663398	0.143372	-0.0279273	0.538243	-0.0463298	0.307073	-0.0790905	0.0809117	0.0199945	0.659499	-0.0530218	0.24236	-0.0376106	0.407099	0.0903749	0.0459979
C19orf35	blue	0.400052	3.51836e-20	0.015922	0.725702	-0.0802562	0.0765225	0.0172395	0.704031	0.248965	2.49362e-08	0.176347	8.98912e-05	0.572343	8.24403e-44	0.365551	7.11297e-17	-0.0808518	0.0743559	0.0453682	0.317232	-0.0183352	0.686189	-0.04321	0.340825	-0.0715508	0.114433	-0.0563689	0.213859	-0.0434548	0.338094	-0.0945438	0.0368101	-0.108646	0.0163491	-0.25907	6.3297e-09	-0.0518753	0.252709
SH2D1B	blue	0.181949	5.28011e-05	0.0514048	0.257043	-0.0173654	0.701973	-0.0328824	0.468618	0.000526354	0.990747	0.0169714	0.708423	0.200589	7.99708e-06	0.0647402	0.153295	0.07324	0.106106	0.0520457	0.251152	0.00443658	0.922126	0.0144548	0.750094	-0.0271288	0.549929	-0.0295335	0.515121	-0.040689	0.369764	-0.0627579	0.166305	-0.0452919	0.318047	0.0599748	0.185942	-0.0557641	0.218822
BARX1	blue	-0.147386	0.0010932	-0.0865773	0.0559738	-0.0158434	0.727001	-0.0501629	0.268731	-0.0891771	0.0489694	-0.0632604	0.162931	-0.260857	4.93612e-09	-0.0839744	0.0638003	-0.0343012	0.449639	-0.0582001	0.199327	-0.00126994	0.977677	-0.0202709	0.655094	0.0110148	0.808231	0.0877085	0.0528299	-0.0296592	0.513333	0.0859268	0.0578509	-0.0213449	0.638092	0.0603534	0.183174	0.0463846	0.306501
SLC2A5	blue	0.213466	1.95061e-06	-0.0384291	0.39696	0.0997397	0.027583	-0.1247	0.00580828	0.356479	4.54546e-16	0.0584951	0.197054	0.352202	1.06779e-15	-0.0821257	0.0698894	-0.0988942	0.0289329	0.0126446	0.780534	-0.00426698	0.925094	0.0624149	0.168637	0.029984	0.508729	-0.00559931	0.901809	-0.00153618	0.972998	-0.00173971	0.969422	-0.00682748	0.880418	0.193897	1.60804e-05	0.0436888	0.335497
NFAM1	blue	0.54459	4.94022e-39	-0.0603767	0.183005	-0.102194	0.0239673	0.020373	0.653471	0.124428	0.00591687	0.235595	1.39877e-07	0.799229	1.57548e-109	0.416397	6.90726e-22	-0.0862302	0.0569691	-0.0592253	0.191511	-0.0703538	0.120637	-0.0328839	0.468597	-0.0499955	0.270334	-0.0398496	0.379728	-0.0418517	0.356233	-0.0712261	0.11609	-0.0798231	0.0781302	-0.208732	3.31077e-06	-0.0494401	0.275698
LILRA6	blue	0.353774	7.81268e-16	-0.00537237	0.90577	-0.0565113	0.212702	-0.0253701	0.576095	0.199027	9.43386e-06	0.219632	9.6162e-07	0.723435	3.15364e-80	0.401029	2.79841e-20	-0.0612113	0.177016	-0.0352376	0.437354	-0.078621	0.0827362	-0.00737994	0.870824	-0.024816	0.58446	-0.0450465	0.32068	-0.0175854	0.69838	-0.0654057	0.149105	-0.0351824	0.438072	-0.0809569	0.0739789	-0.00243957	0.957131
PANX2	blue	-0.104189	0.0213367	-0.177463	8.0951e-05	-0.0821782	0.0697103	-0.0931866	0.0396133	-0.188296	2.83385e-05	-0.0945782	0.0367414	-0.258284	7.05667e-09	-0.141627	0.0017101	-0.0382632	0.399003	-0.0320381	0.480119	0.00459318	0.919386	0.112775	0.012672	-0.0181373	0.689398	0.0871706	0.0543061	-0.0679058	0.134141	0.120548	0.00767863	0.0166832	0.713154	0.15879	0.000429681	0.0588338	0.194469
STAC3	blue	0.500923	2.32192e-32	-0.126843	0.00501281	-0.0881147	0.0517375	0.0251651	0.579184	0.0724993	0.109696	0.100014	0.0271564	0.717168	3.04061e-78	0.267691	1.87457e-09	-0.10514	0.020173	-0.0494415	0.275685	-0.055895	0.217741	-0.0404806	0.372222	0.0263307	0.56173	-0.0491533	0.278497	-0.0610563	0.178117	-0.00870538	0.847884	-0.102157	0.0240177	-0.0571422	0.207631	-0.0368642	0.416479
ATP6V1C2	blue	-0.115431	0.0107122	-0.0283652	0.531889	-0.0157991	0.727735	-0.0537235	0.236174	-0.0857328	0.0584205	-0.0391321	0.388374	-0.187141	3.17858e-05	-0.0428585	0.344771	-0.0701954	0.121478	-0.0113707	0.802161	0.00998219	0.825907	0.119321	0.00832603	0.0362164	0.424722	-0.0116146	0.798008	-0.00771354	0.865039	-0.0240472	0.596158	0.0629104	0.165275	0.0379649	0.402692	0.015215	0.737423
TIMP1	blue	0.215428	1.56097e-06	-0.212544	2.16421e-06	-0.0860821	0.057398	-0.0829085	0.0672554	0.286707	1.09443e-10	0.165278	0.000245412	0.206815	4.08783e-06	0.0403853	0.373351	0.212972	2.06253e-06	0.0115361	0.799344	-0.0664752	0.142555	-0.0241577	0.59447	-0.0387756	0.392714	-0.0318205	0.483107	-0.0160187	0.724104	-0.0337803	0.456556	-0.0844466	0.062317	0.00200642	0.964737	-0.00480866	0.915618
NCKAP1L	blue	0.562173	5.24066e-42	0.184047	4.30842e-05	0.0665456	0.142132	0.0227686	0.615844	0.212647	2.13927e-06	0.216052	1.45358e-06	0.91082	7.08535e-189	0.421886	1.7565e-22	-0.106056	0.0191057	-0.0203786	0.65338	-0.0732519	0.106049	-0.0364441	0.421814	-0.0599173	0.186365	-0.0362367	0.424462	-0.0505051	0.265475	-0.100742	0.0260527	-0.1005	0.0264159	-0.236609	1.23163e-07	-0.0629867	0.164762
TNFRSF25	blue	0.0947585	0.0363826	-0.0261584	0.564294	-0.0932167	0.0395492	0.00356322	0.93742	-0.119506	0.00822511	-0.0649222	0.152141	-0.00981309	0.82881	-0.0966258	0.0328383	-0.134351	0.00294145	-0.0504352	0.266138	-0.0167645	0.711818	-0.0345707	0.446084	0.0844115	0.0624263	0.127209	0.00488707	0.00543571	0.904664	0.126544	0.00511743	-0.00808334	0.858635	0.0523868	0.248055	0.0507539	0.263124
BHLHA15	blue	-0.174994	0.000101972	-0.0946361	0.0366258	0.0877342	0.0527604	-0.0770561	0.0890579	-0.121602	0.00715851	-0.0786755	0.0825227	-0.241012	7.0404e-08	-0.131601	0.0035869	-0.0128506	0.777053	-0.0842067	0.0630669	-0.034955	0.441041	-0.0510249	0.260581	-0.00588672	0.896796	-0.0328911	0.468501	-0.0463881	0.306464	0.130775	0.00380449	-0.000103135	0.998187	0.139289	0.00204127	0.020524	0.651071
INSL3	blue	0.174835	0.000103485	-0.00225132	0.960437	-0.0568574	0.20991	-0.0266403	0.557138	0.0020247	0.964416	-0.0463605	0.306752	0.0783106	0.0839601	-0.0864406	0.056364	0.168732	0.000180586	0.0364043	0.422321	0.0111981	0.805103	0.0675511	0.136191	-0.0623071	0.169375	-0.0461264	0.309204	-0.0670519	0.139116	-0.0652219	0.150254	-0.0225503	0.619233	0.0975817	0.0311409	-0.00263502	0.953701
S100P	blue	-0.192659	1.82512e-05	-0.13821	0.00221315	-0.0277358	0.541035	-0.0869477	0.0549276	-0.170513	0.0001538	-0.0945561	0.0367856	-0.294784	3.06364e-11	-0.140166	0.00191075	0.246497	3.45459e-08	0.0244798	0.589562	0.00746505	0.869347	0.0337957	0.45635	-0.0412616	0.363061	-0.0198539	0.661746	-0.0752915	0.0966458	-0.0386366	0.394414	-0.0300578	0.507686	0.166248	0.000225297	-0.0387932	0.392499
MMP17	blue	-0.0928577	0.040319	-0.138868	0.00210686	-0.0541979	0.232056	-0.0821062	0.0699563	0.00929926	0.837646	-0.081828	0.070913	-0.174466	0.000107088	-0.105713	0.0194999	-0.0840824	0.0634587	-0.063399	0.162009	-0.0387486	0.393044	-0.0296453	0.513531	-0.0476542	0.293436	-0.0432983	0.339838	-0.0291069	0.521211	-0.0597902	0.187302	-0.0107444	0.812852	0.0939532	0.0380086	0.00488194	0.914337
HBD	blue	0.0912333	0.043963	-0.0164033	0.717759	0.0270555	0.551006	-0.0324199	0.474899	0.0535858	0.23738	0.020414	0.652819	0.23493	1.52002e-07	0.0164257	0.717389	0.087473	0.0534722	-0.0230867	0.610919	-0.0241649	0.594359	-0.0165153	0.715914	0.0146191	0.74735	-0.0073833	0.870765	-0.0149381	0.74203	0.00770398	0.865205	-0.020824	0.646315	0.042034	0.354139	-0.00629465	0.889689
KMO	blue	0.182422	5.04435e-05	0.217595	1.21749e-06	0.194585	1.49826e-05	-0.0541519	0.232454	0.0458987	0.311601	0.0590121	0.193118	0.475753	6.24616e-29	0.0825026	0.068611	-0.0662679	0.143807	-0.00122098	0.978537	-0.036802	0.417267	0.064124	0.157253	-0.0296763	0.513091	-0.0438149	0.334102	-0.0499776	0.270506	-0.0237294	0.601023	-0.0460254	0.310266	0.0862695	0.0568554	-0.0415257	0.359995
NPW	blue	-0.1265	0.0051332	-0.0847559	0.061361	-0.000613105	0.989222	-0.0569756	0.208962	-0.0356551	0.43194	-0.0630265	0.164495	-0.198374	1.01035e-05	-0.102859	0.0230608	-0.00885602	0.845285	-0.0224874	0.620211	0.00844769	0.852335	-0.0125023	0.782942	-0.000673755	0.988155	-0.012783	0.778194	-0.00720167	0.873918	0.00139546	0.975471	0.0189919	0.675577	0.0674675	0.136677	0.0307395	0.498104
TMED3	blue	-0.0821102	0.0699424	-0.254933	1.11748e-08	-0.0488469	0.281508	-0.0971006	0.0319855	-0.190009	2.3871e-05	-0.11588	0.010409	-0.25676	8.70503e-09	-0.166841	0.000213758	0.179234	6.8468e-05	-0.0237933	0.600044	0.00622888	0.890834	0.00337161	0.940779	-0.0354245	0.434925	-0.0530994	0.241671	-0.0918007	0.0426598	-0.0676567	0.135578	-0.0783823	0.083676	0.0292023	0.519845	-0.0584161	0.197661
DHRS13	blue	-0.204712	5.13968e-06	-0.246143	3.61885e-08	-0.0439084	0.333071	-0.107692	0.0173213	-0.207819	3.66126e-06	-0.126226	0.00523119	-0.311446	1.94696e-12	-0.239277	8.78753e-08	-0.00153101	0.973089	-0.00191271	0.966383	0.0616831	0.173695	-0.0330312	0.466607	0.129398	0.00419385	0.142862	0.00155574	0.0609671	0.178753	0.115637	0.0105723	0.210891	2.60484e-06	0.158611	0.000436249	0.00391743	0.931214
LAPTM5	blue	0.583666	6.81129e-46	-0.0529034	0.243415	-0.050373	0.266728	-0.0586169	0.196121	0.304148	6.65264e-12	0.103135	0.0226928	0.883216	6.1267e-162	0.294354	3.28194e-11	-0.0883642	0.0510759	-0.024206	0.593733	-0.0844721	0.0622377	-0.0405398	0.371523	-0.0562724	0.214645	-0.0598783	0.186652	-0.0573103	0.206295	-0.127766	0.00470154	-0.108647	0.0163483	-0.112203	0.0131335	-0.0502317	0.268074
MYO1F	blue	0.598802	8.27705e-49	-0.0215279	0.635214	-0.0285269	0.52955	0.0297202	0.512466	0.138349	0.00219027	0.176866	8.56244e-05	0.83134	4.52024e-126	0.422325	1.57253e-22	-0.103064	0.0227869	-0.0719653	0.112343	-0.101901	0.0243756	-0.0591982	0.191715	-0.0730875	0.106838	-0.0816576	0.0715046	-0.0661825	0.144325	-0.0977921	0.0307775	-0.110214	0.0148551	-0.228872	3.20488e-07	-0.053207	0.240717
ZDHHC14	blue	0.162439	0.000314382	0.0962013	0.0336169	-0.0576982	0.203236	0.0173846	0.701659	0.118997	0.00850484	0.202161	6.76392e-06	0.305343	5.45291e-12	0.297304	2.04208e-11	0.254167	1.24012e-08	0.0655338	0.148309	0.0397623	0.380773	0.0071403	0.874983	0.0139149	0.759136	0.00169118	0.970275	0.138107	0.00223019	0.25958	5.89678e-09	-0.0261771	0.564016	0.0600611	0.185308	-0.00024187	0.995748
THNSL1	blue	-0.133114	0.0032173	-0.0191213	0.673493	0.0731699	0.106442	-0.0526162	0.245986	-0.198685	9.77875e-06	-0.0559851	0.216999	-0.27124	1.12156e-09	-0.19102	2.15573e-05	-0.0876011	0.0531219	0.0199248	0.660612	0.0224203	0.621255	-0.0583292	0.19833	0.0382956	0.398604	-0.0280879	0.535907	-0.0719133	0.112604	0.000329965	0.994199	0.135955	0.00261569	0.103488	0.0222306	-0.0476312	0.293669
KRTCAP2	blue	-0.103448	0.0222823	-0.267043	2.05718e-09	-0.111623	0.0136165	-0.0997066	0.0276348	-0.26704	2.0582e-09	-0.157233	0.000489959	-0.348674	2.13878e-15	-0.241923	6.26248e-08	-0.0147579	0.745034	-0.111591	0.0136438	-0.0937569	0.0384141	-0.0230846	0.610951	-0.0208499	0.645905	-0.0318161	0.483168	-0.0819118	0.0706236	0.0406874	0.369783	-0.0759517	0.0937488	0.0769341	0.0895664	-5.91743e-06	0.999896
FCER1G	blue	0.548785	9.99899e-40	-0.138375	0.002186	-0.0872906	0.0539737	-0.0861481	0.0572065	0.237691	1.07463e-07	0.0940181	0.0378753	0.805653	1.3756e-112	0.180804	5.89453e-05	-0.0915627	0.0432024	-3.85605e-05	0.999322	-0.0725186	0.109601	-0.0232393	0.608564	-0.044792	0.323424	-0.0591613	0.191992	-0.0551337	0.224082	-0.107512	0.0175105	-0.0899646	0.0469983	-0.00936627	0.836493	-0.0357034	0.431316
LAPTM4B	blue	-0.191043	2.15065e-05	-0.0621563	0.170412	0.0840564	0.0635407	-0.121608	0.00715584	-0.0912148	0.044006	-0.0963856	0.033277	-0.280462	2.84987e-10	-0.218803	1.05885e-06	-0.117568	0.00933513	-0.097528	0.0312341	-0.0368564	0.416578	-0.0585685	0.196491	0.156584	0.000517334	-0.00906933	0.841607	0.0282592	0.533423	0.0834804	0.0653831	0.0373046	0.410929	0.151669	0.000775615	0.0586318	0.196008
TRIM45	blue	-0.307311	3.92222e-12	0.0656677	0.14748	0.0190474	0.674682	0.00541096	0.905096	-0.190769	2.21098e-05	-0.0533281	0.239646	-0.331497	5.56875e-14	-0.157828	0.000466028	-0.125481	0.00550605	-0.00160293	0.971825	0.0509435	0.261343	0.0494681	0.275427	0.108061	0.0169394	0.145756	0.00124284	0.060125	0.184841	0.0272774	0.547744	0.121389	0.00726116	0.106961	0.0181002	0.0770504	0.0890817
INHA	blue	-0.139759	0.00197032	-0.0660672	0.145028	-0.0109018	0.810161	-0.0689319	0.128345	-0.0819518	0.0704858	-0.0481739	0.288198	-0.191504	2.05261e-05	-0.0764301	0.0916932	0.0174301	0.700916	-0.00581232	0.898093	-0.00523968	0.908087	0.132171	0.00344325	-0.0238115	0.599764	-0.0150458	0.740238	-0.0395774	0.382994	-0.0175796	0.698475	-0.0179883	0.691819	0.111982	0.0133162	0.00970142	0.830729
SLC26A6	blue	-0.0932192	0.0395437	-0.0935446	0.0388568	-0.0466682	0.30355	-0.00641893	0.887525	-0.200591	7.99587e-06	-0.0876774	0.0529143	-0.210872	2.61041e-06	-0.116466	0.0100243	0.0861546	0.0571877	-0.0186475	0.681134	-0.0294763	0.515935	-0.0293082	0.518332	-0.0518529	0.252914	-0.0418286	0.356498	-0.0533021	0.239876	0.020817	0.646425	-0.00732113	0.871844	0.0179746	0.692043	0.0185114	0.683335
NRROS	blue	0.474803	8.30958e-29	-0.127653	0.00473872	-0.132121	0.00345576	-0.00235085	0.958689	0.145161	0.00130204	0.206022	4.45746e-06	0.772589	6.12195e-98	0.485073	3.61968e-30	-0.0402535	0.374913	-0.073078	0.106883	-0.0238505	0.599168	-0.0159014	0.726043	-0.0172498	0.703862	0.0640054	0.158024	0.0204303	0.652559	-0.0677168	0.13523	-0.045261	0.318378	-0.132375	0.00339334	-0.0576749	0.203418
SIRPB2	blue	0.419395	3.28002e-22	0.136504	0.00251203	-0.041102	0.364921	0.00219079	0.961499	0.240813	7.22247e-08	0.178838	7.10931e-05	0.772668	5.68698e-98	0.348837	2.07163e-15	-0.113587	0.0120418	0.0375436	0.407937	-0.0587599	0.195031	0.0101375	0.823243	-0.0277775	0.540426	0.199045	9.41515e-06	-0.0442872	0.328913	-0.106024	0.019142	-0.0767917	0.0901633	-0.147726	0.00106418	-0.0213223	0.638448
C9orf172	blue	-0.147904	0.00104929	-0.129306	0.00422097	-0.00879406	0.846354	-0.0473302	0.296734	-0.238764	9.37987e-08	-0.132062	0.00347039	-0.349123	1.95876e-15	-0.164844	0.000254951	0.00506789	0.911087	-0.0922565	0.0416367	-0.0395031	0.383889	-0.0669312	0.139831	-0.060837	0.179684	-0.035939	0.42828	-0.110005	0.015047	0.123175	0.00644133	-0.0549643	0.225511	-0.00801631	0.859795	0.00277122	0.95131
NCF1	blue	0.584726	4.30406e-46	-0.112495	0.012896	-0.0542489	0.231616	-0.00307342	0.946008	0.137158	0.00239339	0.22714	3.95215e-07	0.729165	4.32676e-82	0.238463	9.74494e-08	-0.0935936	0.0387543	-0.0559285	0.217465	-0.0478372	0.291585	-0.0103621	0.819393	-0.0267533	0.555465	-0.0464874	0.305429	-0.0515023	0.256141	-0.0278311	0.539644	-0.0706313	0.119176	-0.064049	0.157741	-0.0379334	0.403083
SIX1	blue	-0.0630501	0.164336	-0.053078	0.24186	-0.0605612	0.181668	0.0414258	0.361153	-0.0408081	0.368363	-0.0589453	0.193623	-0.161411	0.000343528	-0.146702	0.0011539	-0.113543	0.0120755	-0.00129508	0.977235	-0.00837266	0.853631	-0.077644	0.0866387	0.0157087	0.729231	-0.0173	0.703042	0.0948514	0.0361988	0.0121084	0.789618	-0.0364429	0.421829	-0.105537	0.0197044	0.0199894	0.65958
LYSMD1	blue	-0.249183	2.42261e-08	-0.124915	0.00572338	-0.00441555	0.922494	-0.154936	0.000593362	-0.191834	1.98506e-05	-0.134749	0.0028574	-0.381794	2.21098e-18	-0.289744	6.81265e-11	-0.0536974	0.236402	-0.102727	0.0232383	-0.0523754	0.248157	-0.00576749	0.898875	0.0625491	0.167721	0.0359087	0.42867	0.0362345	0.42449	0.0810328	0.0737075	0.0319816	0.480894	0.258565	6.78746e-09	-0.00592462	0.896136
C2orf15	blue	-0.350296	1.55581e-15	-0.0825639	0.0684047	0.00967379	0.831204	-0.075755	0.0946043	-0.23363	1.78695e-07	-0.115846	0.0104318	-0.459531	7.2432e-27	-0.273576	7.96519e-10	0.0315004	0.487523	-0.0853036	0.0596978	0.0496572	0.273593	0.0295874	0.514354	0.209699	2.97453e-06	0.0205824	0.650144	-0.0286499	0.527777	0.238268	9.98865e-08	0.216266	1.41834e-06	0.245582	3.89482e-08	-0.00293973	0.948354
C1orf56	blue	-0.236134	1.3073e-07	-0.125949	0.00533194	-0.0190167	0.675177	-0.10177	0.0245602	-0.267862	1.82906e-09	-0.126115	0.00527106	-0.414235	1.1762e-21	-0.177954	7.72928e-05	-0.0920817	0.0420267	-0.11152	0.0137038	-0.0702359	0.121262	-0.022926	0.613404	-0.0208975	0.645151	-0.0157313	0.728857	-0.070163	0.12165	0.117398	0.00943879	-0.0389016	0.391177	0.0437105	0.335257	-0.00561737	0.901494
BDH1	blue	-0.271135	1.13877e-09	-0.13072	0.00381915	-0.0380382	0.401784	-0.017382	0.7017	-0.284997	1.42581e-10	-0.112721	0.0127156	-0.360268	2.10983e-16	-0.212418	2.19526e-06	0.204196	5.43442e-06	0.0434551	0.33809	0.286887	1.06439e-10	-0.0303651	0.503355	0.0784977	0.0832204	0.140737	0.00182984	-0.0682924	0.131934	0.151811	0.000766756	0.0294821	0.515852	0.19156	2.04102e-05	-0.0188385	0.67805
NSMF	blue	-0.141779	0.00169039	-0.188132	2.88038e-05	-0.0851636	0.0601192	-0.115335	0.0107783	-0.135874	0.00263122	-0.0876032	0.0531163	-0.312471	1.63383e-12	-0.12532	0.00556693	-0.0257967	0.569694	-0.0646324	0.153982	-0.0365063	0.421021	0.00365626	0.93579	-0.0375892	0.407367	-0.0362185	0.424695	-0.0315966	0.486194	0.162383	0.000315922	-0.0466205	0.304045	0.0741632	0.101762	0.0646464	0.153893
ITGAL	blue	0.637901	4.16245e-57	-0.00302218	0.946907	-0.082995	0.0669694	0.0655892	0.147966	0.0381154	0.400829	0.102906	0.0229974	0.728667	6.31082e-82	0.375379	8.91512e-18	-0.0916918	0.0429073	-0.0739603	0.102705	-0.079333	0.0799822	-0.0472785	0.297263	-0.0613988	0.17569	-0.0715205	0.114587	-0.0707815	0.118391	-0.0587408	0.195176	-0.0910577	0.044373	-0.235604	1.39715e-07	-0.0482494	0.287442
DHRS11	blue	-0.0990158	0.0287353	-0.156242	0.000532304	-0.0818378	0.0708793	-0.0870262	0.054708	-0.253879	1.28964e-08	-0.134348	0.00294219	-0.308414	3.25719e-12	-0.216836	1.32859e-06	-0.0339663	0.454079	-0.0485718	0.28423	0.0439506	0.332605	-0.0555653	0.220471	-0.0295402	0.515026	-0.00442484	0.922331	-0.0457509	0.313163	0.101629	0.0247603	0.0287155	0.526832	0.147163	0.00111269	0.0207462	0.647547
PGLYRP1	blue	0.0154365	0.733745	0.111248	0.0139374	0.0079346	0.86121	0.0445225	0.326347	-0.0288934	0.524273	0.0249647	0.58221	0.0801013	0.0770945	0.052984	0.242696	-0.0132111	0.770969	-0.0165201	0.715836	-0.0107609	0.812569	0.00452708	0.920542	-0.000669625	0.988228	-0.00952512	0.83376	-0.00728603	0.872453	0.0148174	0.744042	-0.00775391	0.86434	-0.0616412	0.173988	0.00374321	0.934266
RXFP2	blue	-0.00337551	0.940711	0.189191	2.59141e-05	-0.0118029	0.794805	0.0304969	0.501503	-0.0219291	0.628921	0.0469011	0.301141	0.210845	2.61834e-06	0.14662	0.0011614	-0.0654117	0.149068	-0.0437412	0.334916	-0.0443719	0.327988	-0.00909903	0.841095	-0.026334	0.561681	-0.0291091	0.521179	-0.0248076	0.584588	-0.0637346	0.159795	-0.0424068	0.349884	-0.222304	7.0327e-07	-0.0268112	0.55461
THEM5	blue	-0.185314	3.80615e-05	-0.0980872	0.030274	-0.0168574	0.710293	-0.144528	0.0013678	-0.121757	0.00708486	-0.109173	0.015833	-0.353199	8.75938e-16	-0.170781	0.000150112	-0.0297876	0.51151	-0.0340332	0.45319	-0.042443	0.349472	-0.0283919	0.531502	-0.0601742	0.18448	-0.0354995	0.433952	-0.102558	0.0234671	0.00304222	0.946556	-0.0477356	0.292611	0.0907176	0.0451762	0.041326	0.362311
LST1	blue	0.428948	2.90636e-23	-0.115814	0.010453	-0.041213	0.363627	0.00643059	0.887322	0.0870511	0.0546385	0.0467237	0.302974	0.58963	5.04376e-47	0.136827	0.00245278	-0.0727893	0.108279	-0.052692	0.245306	-0.0778154	0.0859438	-0.0542433	0.231665	-0.0387662	0.392829	-0.0617655	0.17312	-0.0612524	0.176725	-0.125398	0.00553739	-0.105082	0.0202425	-0.152136	0.000746732	-0.0552293	0.223278
CYP27C1	blue	-0.109816	0.0152226	-0.00269181	0.952704	0.0309211	0.495567	-0.0310305	0.494042	0.115594	0.0106009	-0.0653939	0.149179	-0.165333	0.000244226	-0.12549	0.0055025	0.014836	0.743732	0.155106	0.000585075	0.00167694	0.970525	-0.0436186	0.336274	-0.036977	0.415054	-0.0208052	0.646612	0.0715794	0.114287	-0.0102747	0.82089	-0.0239072	0.5983	0.081639	0.0715694	0.0215184	0.635363
FAM83H	blue	-0.133505	0.00312783	-0.246951	3.25459e-08	-0.0650846	0.151116	-0.119426	0.00826849	-0.237359	1.12053e-07	-0.162624	0.000309381	-0.413278	1.48685e-21	-0.229795	2.86448e-07	0.0964685	0.033125	0.124021	0.00608274	0.076655	0.0907391	-0.018383	0.685413	-0.0935724	0.0387987	-0.0313994	0.488921	-0.131144	0.00370576	-0.0446764	0.324676	-0.0574033	0.205559	0.0999091	0.027319	0.0252699	0.577604
PRSS50	blue	-0.113603	0.0120296	-0.017331	0.702535	-0.0188712	0.677522	-0.0165963	0.714581	-0.0527016	0.24522	-0.0502545	0.267857	-0.159947	0.000389445	-0.108845	0.0161528	-0.0396074	0.382633	-0.0250846	0.580399	0.000958079	0.983158	0.000353313	0.993789	0.00906966	0.841601	0.0302181	0.505424	-0.00328312	0.942331	0.038432	0.396925	0.0909938	0.0445229	0.0443254	0.328496	0.0519148	0.252347
DNASE1	blue	-0.253018	1.4491e-08	0.156233	0.000532734	0.000369984	0.993496	-0.0133251	0.769049	-0.201791	7.03704e-06	-0.056244	0.214877	-0.270295	1.28696e-09	-0.135955	0.00261563	-0.0739283	0.102853	-0.0768566	0.0898909	-0.0758325	0.0942665	-0.0158319	0.727192	-0.033353	0.462275	-0.0516492	0.254785	0.02536	0.576247	0.101789	0.0245342	-0.0147694	0.744842	-0.0118213	0.794493	0.0124739	0.783422
TMEM156	blue	0.183628	4.48764e-05	0.0812889	0.0727979	0.0359936	0.427578	-0.0631604	0.163598	0.115335	0.010778	-0.0499647	0.27063	0.22342	6.16363e-07	-0.0929026	0.0402222	-0.0356393	0.432144	-0.011145	0.806009	-0.050463	0.265874	-0.0283162	0.532597	-0.0637533	0.159672	-0.0412705	0.362957	-0.0521886	0.249851	-0.0843398	0.0626502	-0.0532853	0.240024	0.132744	0.00330444	-0.0351199	0.438888
MUC20	blue	-0.0964782	0.0331073	-0.124303	0.00596714	-0.0625041	0.168028	-0.0060956	0.893156	-0.146802	0.00114485	-0.0553184	0.222532	-0.151427	0.000790989	-0.0897307	0.0475767	0.129759	0.00408841	0.0584775	0.197189	0.112197	0.0131383	0.044935	0.32188	0.0365649	0.420276	0.108484	0.0165108	-0.0576126	0.203908	-0.023003	0.612213	-0.00195652	0.965614	0.0654973	0.148535	0.0561809	0.215393
KIAA1522	blue	-0.169981	0.00016139	-0.28352	1.78886e-10	-0.163114	0.000296518	-0.0166085	0.714381	-0.27006	1.33158e-09	-0.104235	0.0212787	-0.381269	2.48113e-18	-0.168539	0.000183743	0.17204	0.000133859	0.0692706	0.126476	0.0751049	0.0974775	-0.002209	0.96118	-0.135063	0.00279254	-0.0622098	0.170044	-0.113237	0.0123102	-0.156985	0.000500229	0.0202054	0.656137	-0.0489292	0.280697	0.159373	0.000408923
TOX3	blue	-0.225113	5.03951e-07	-0.00302326	0.946888	-0.0302768	0.504596	-0.0281897	0.534431	-0.18456	4.09771e-05	-0.0606395	0.181104	-0.223819	5.87897e-07	-0.124687	0.00581324	0.130391	0.00390955	-0.128672	0.00441322	-0.0493898	0.276188	-0.0714599	0.114895	0.00056748	0.990024	-0.0362416	0.4244	-0.0508061	0.262633	0.141138	0.00177504	-0.0286654	0.527554	-0.0750235	0.0978419	0.0425454	0.348309
SMIM22	blue	-0.0772545	0.0882354	-0.247726	2.93843e-08	-0.0599979	0.185772	-0.0382929	0.398638	-0.228004	3.56067e-07	-0.131446	0.00362668	-0.248779	2.55589e-08	-0.201658	7.13725e-06	0.231628	2.28842e-07	-0.0920737	0.0420447	-0.0650624	0.151256	-0.030779	0.497551	-0.0377821	0.404963	-0.0604966	0.182136	-0.122395	0.00678842	-0.0637796	0.159499	-0.11099	0.0141613	-0.0615901	0.174346	-0.0465623	0.304649
MRPL24	blue	-0.0988409	0.0290199	-0.284585	1.51901e-10	-0.0348142	0.442884	-0.146162	0.00120388	-0.2666	2.19187e-09	-0.161238	0.000348682	-0.331215	5.86564e-14	-0.257906	7.43477e-09	0.000731441	0.987141	-0.0633707	0.162197	-0.0623865	0.168831	-0.0636111	0.160607	-0.0521205	0.25047	0.0163332	0.718913	-0.110059	0.0149974	-0.0510067	0.260751	-0.0766982	0.0905571	0.130844	0.00378587	-0.0447773	0.323584
FBXO16	blue	-0.179654	6.57884e-05	-0.092879	0.0402729	0.0669898	0.139483	0.0128123	0.7777	-0.189849	2.42564e-05	-0.116512	0.00999472	-0.311424	1.95443e-12	-0.168079	0.00019145	0.00797915	0.860439	-0.0893768	0.048463	-0.0325558	0.473049	-0.0822217	0.069562	0.00773977	0.864585	-0.0438307	0.333927	-0.0795683	0.0790887	0.109809	0.0152296	-0.0218304	0.630467	0.0486646	0.283309	-0.0430052	0.34312
HOXC13	blue	-0.195534	1.35843e-05	-0.0881132	0.0517416	-0.044082	0.331161	-0.0556475	0.219788	-0.0244959	0.589317	-0.0311861	0.491879	-0.255413	1.04671e-08	-0.101792	0.0245296	-0.0070476	0.876593	0.00391135	0.931321	0.033574	0.459312	0.164603	0.000260392	0.0320097	0.480508	0.0462842	0.30755	-0.00981218	0.828826	0.0154307	0.73384	0.198776	9.68616e-06	0.12506	0.00566699	0.0110113	0.808292
TMEM52	blue	-0.135527	0.00269922	-0.169329	0.000171157	-0.0479674	0.290272	-0.0380776	0.401296	-0.150697	0.000839142	-0.112797	0.0126546	-0.298471	1.69015e-11	-0.193547	1.66681e-05	-0.0927804	0.0404866	-0.0882722	0.0513192	-0.0420488	0.35397	-0.0510929	0.259945	-0.0328971	0.468419	-0.0303045	0.504206	-0.057317	0.206242	0.00843611	0.852535	0.0785971	0.0828299	0.120054	0.00793331	0.0967947	0.0325328
FAM53A	blue	-0.179041	6.97384e-05	0.010135	0.823285	0.16594	0.000231508	-0.0412545	0.363144	-0.196761	1.19601e-05	-0.0670189	0.139311	-0.297334	2.03248e-11	-0.199276	9.18879e-06	-0.143898	0.00143623	-0.116041	0.0103021	-0.0965598	0.0329583	-0.0716711	0.113823	0.0016753	0.970554	0.0248081	0.58458	-0.0410862	0.365106	-0.0433978	0.338729	-0.0104875	0.817246	-0.0417196	0.357754	-0.00658449	0.884644
IL4I1	blue	0.460597	5.34189e-27	-0.131095	0.0037186	-0.0436003	0.336477	-0.117361	0.00946147	0.168583	0.000183017	0.00209151	0.963243	0.508038	2.20545e-33	-0.0605149	0.182003	-0.0995593	0.0278664	-0.0485549	0.284397	-0.0320257	0.480289	0.0197346	0.663653	0.0198353	0.662042	-0.0232517	0.608372	-0.0282682	0.533292	-0.00719583	0.874019	-0.0288435	0.52499	0.143187	0.00151739	-0.021462	0.636248
APOC1	blue	0.325068	1.79153e-13	-0.0943539	0.0371919	-0.058188	0.19942	-0.00452676	0.920548	-0.0131595	0.771839	0.0301363	0.506578	0.511202	7.60498e-34	0.255921	9.76561e-09	-0.0307909	0.497386	-0.0373015	0.410969	-0.0538489	0.235081	-0.0122425	0.787342	0.00488806	0.91423	-0.0411638	0.364201	-0.038408	0.397219	-0.0475616	0.294377	-0.0396212	0.382467	-0.0935719	0.0387997	-0.0286037	0.528442
CD37	blue	0.571188	1.331e-43	-0.0898519	0.0472762	-0.146199	0.00120042	0.0941045	0.0376984	0.10371	0.0219442	0.135273	0.00274987	0.693886	2.53854e-71	0.437118	3.43693e-24	-0.0475683	0.294308	-0.0822252	0.06955	-0.0799227	0.0777582	-0.0465375	0.304908	-0.0733458	0.105601	-0.0747042	0.0992828	-0.0513958	0.257127	-0.0958434	0.0342857	-0.108951	0.0160483	-0.336528	2.1888e-14	-0.0423898	0.350077
SCARF1	blue	0.280673	2.76044e-10	-0.0369028	0.415991	-0.0503818	0.266645	0.128829	0.00436492	0.00370814	0.934881	0.0635307	0.161138	0.367339	4.90093e-17	0.386438	7.90349e-19	-0.111225	0.0139571	-0.0803937	0.0760178	-0.101824	0.0244835	-0.0582576	0.198882	-0.0773406	0.0878806	-0.0784875	0.0832607	-0.0480916	0.289023	-0.132677	0.00332043	-0.114756	0.0111827	-0.362496	1.33725e-16	-0.0566679	0.211435
SPERT	blue	-0.165385	0.000243115	-0.0818349	0.0708892	-0.0259608	0.567242	-0.0562014	0.215225	-0.0992931	0.0282891	-0.0573594	0.205906	-0.241181	6.8895e-08	-0.103733	0.021914	0.0231996	0.609175	0.0445361	0.326199	-0.00294176	0.948318	0.0302257	0.505317	0.0035461	0.937721	0.00666196	0.883296	-0.0215168	0.635387	0.0577514	0.202819	-0.0141209	0.755682	0.0268027	0.554736	-0.0100302	0.825083
CD244	blue	0.489493	9.09193e-31	0.0516462	0.254813	0.0308607	0.49641	0.00129969	0.977154	0.0210636	0.642527	0.201269	7.43995e-06	0.61897	6.07315e-53	0.191013	2.15722e-05	-0.0221794	0.625009	-0.0218583	0.630031	-0.0676373	0.13569	0.0373392	0.410496	-0.0349057	0.441686	-0.0558776	0.217885	-0.0618143	0.17278	-0.0729949	0.107284	-0.0408857	0.367453	-0.0360223	0.42721	-0.0555433	0.220654
FCRL5	blue	0.215226	1.59728e-06	0.37919	3.90828e-18	0.069804	0.123574	0.0331399	0.465142	0.19781	1.07193e-05	0.043576	0.336747	0.304042	6.77104e-12	0.0944422	0.037014	-0.0973919	0.0314718	-0.00416185	0.926934	-0.0385776	0.395137	-0.0325704	0.47285	0.00930006	0.837633	0.0208896	0.645277	-0.0181439	0.689292	0.0432913	0.339917	-0.0282261	0.533902	-0.0419565	0.355029	0.00332161	0.941656
CLDN10	blue	-0.197926	1.05903e-05	-0.0932971	0.0393785	0.0214926	0.635768	-0.0298345	0.510845	-0.0336254	0.458624	-0.0751962	0.0970699	-0.235354	1.44163e-07	-0.11033	0.0147497	0.0433344	0.339436	-0.0486469	0.283485	-0.02982	0.511051	-0.0456893	0.313816	-0.027569	0.543471	-0.032185	0.478107	-0.0495095	0.275024	-0.0180321	0.691107	-0.0568278	0.210147	0.0397321	0.381135	0.0264635	0.559758
TESC	blue	-0.159209	0.000414679	-0.11325	0.0123004	-0.0363828	0.422595	-0.0894842	0.0481927	-0.116322	0.0101176	-0.0893268	0.0485893	-0.286052	1.21146e-10	-0.114766	0.0111757	0.240883	7.15791e-08	-0.0497094	0.273089	-0.0284334	0.530902	-0.0303913	0.502986	-0.0352877	0.436702	-0.0208857	0.645338	-0.0567787	0.210542	8.14846e-05	0.998567	-0.0548839	0.226191	0.068367	0.131511	-0.0482233	0.287703
KLRF1	blue	0.0584138	0.197679	0.104748	0.0206461	0.0494608	0.275497	-0.00372959	0.934505	-0.0222115	0.62451	0.0126913	0.779745	0.154118	0.000634829	0.0485999	0.283951	0.0113289	0.802874	0.0556541	0.219733	0.0166847	0.713129	0.00486963	0.914552	-0.0075858	0.867253	-0.00755508	0.867786	-0.0151107	0.739158	-0.0029308	0.94851	-0.0197546	0.663333	0.0933584	0.0392488	-0.0328064	0.469647
HGD	blue	-0.16735	0.000204308	-0.102081	0.0241233	0.00789523	0.861892	-0.0827784	0.0676875	-0.180916	5.83167e-05	-0.090295	0.0461914	-0.30144	1.04053e-11	-0.119196	0.0083947	0.17995	6.39559e-05	-0.0525878	0.246242	0.00235231	0.958663	-0.00847462	0.851869	-0.0201718	0.656673	-0.00689654	0.879218	-0.0679343	0.133977	0.0919055	0.0424228	-0.0255868	0.57284	0.0905756	0.0455152	-0.0467572	0.302628
AIM2	blue	0.325895	1.54387e-13	0.0158395	0.727067	0.0579537	0.201239	-0.10571	0.019503	0.165003	0.000251413	-0.0448287	0.323027	0.264525	2.94565e-09	-0.113844	0.0118479	-0.08005	0.0772845	0.048137	0.288567	-0.0431043	0.342008	-0.0346577	0.444939	-0.0566325	0.211721	-0.0119779	0.791832	-0.0323396	0.475995	-0.099072	0.0286444	-0.0535828	0.237405	0.200408	8.15252e-06	-0.020896	0.645177
SLA	blue	0.389545	3.9344e-19	0.370008	2.79845e-17	0.117188	0.00956804	0.0137465	0.761961	0.224503	5.41984e-07	0.126265	0.00521704	0.712379	9.18442e-77	0.272037	9.98321e-10	-0.119979	0.00797273	0.0203512	0.653816	-0.0361529	0.425534	-0.0276727	0.541955	-0.0620578	0.171091	-0.0647884	0.152989	-0.0543165	0.231035	-0.111977	0.0133203	-0.0961817	0.0336533	-0.152566	0.000720984	-0.041985	0.354702
P2RX1	blue	0.351595	1.20397e-15	0.0493154	0.276913	-0.0358478	0.429454	0.104971	0.0203758	0.133144	0.00321049	0.0651373	0.150785	0.472601	1.60471e-28	0.321085	3.64504e-13	-0.104377	0.0211019	-0.0665487	0.142113	-0.0763422	0.0920678	-0.0575578	0.204339	-0.0303806	0.503137	-0.0490265	0.27974	-0.0467009	0.303211	-0.00138991	0.975568	-0.0591885	0.191788	-0.211387	2.46444e-06	0.0126096	0.781127
CPS1	blue	-0.146546	0.0011681	-0.0714875	0.114754	-0.00413226	0.927452	-0.0691506	0.127136	-0.0793875	0.0797745	-0.0711359	0.116554	-0.234153	1.67454e-07	-0.112007	0.013295	0.0350041	0.440399	-0.0317639	0.483886	-0.021903	0.62933	0.0177496	0.695704	-0.0163118	0.719266	-0.00847378	0.851884	-0.0430569	0.34254	0.0260919	0.565286	-0.00769901	0.865291	0.175698	9.55079e-05	-0.0149269	0.742217
RNF207	blue	-0.0965016	0.0330645	0.101391	0.0251019	0.00579012	0.898481	0.0564037	0.213576	-0.199062	9.39878e-06	-0.0466284	0.303963	-0.153958	0.000643278	-0.134119	0.00299145	0.00294238	0.948307	-0.0462015	0.308416	-0.0261695	0.56413	-0.00727272	0.872684	-0.0684413	0.131091	-0.0400311	0.37756	-0.102155	0.0240204	-0.060489	0.182191	-0.0145322	0.748802	-0.0660461	0.145156	0.0140637	0.75664
KRTCAP3	blue	-0.135868	0.00263241	-0.23908	9.01079e-08	-0.0772154	0.0883971	-0.111076	0.014086	-0.264852	2.81213e-09	-0.144855	0.00133346	-0.341448	8.63713e-15	-0.204514	5.25094e-06	0.0926125	0.0408521	-0.03933	0.385977	-0.0593214	0.19079	-0.0311435	0.49247	-0.0641498	0.157086	-0.0462823	0.30757	-0.126859	0.00500714	-0.0843802	0.062524	-0.0737473	0.103701	0.0412595	0.363085	-0.0597709	0.187445
FOXO6	blue	-0.147793	0.00105859	-0.115932	0.0103742	-0.0623759	0.168904	-0.0550084	0.225138	-0.0877539	0.0527069	-0.029479	0.515896	-0.225442	4.84566e-07	-0.170173	0.000158611	-0.102207	0.0239485	-0.0604216	0.182679	0.0271259	0.549971	0.0551046	0.224327	0.118577	0.00874189	0.0647643	0.153142	0.125691	0.0054272	0.211824	2.34667e-06	0.125658	0.00543948	0.13001	0.00401639	0.122394	0.00678889
CDH1	blue	-0.0427759	0.345702	-0.105337	0.0199395	0.00682193	0.880515	-0.0209249	0.644719	0.000830517	0.9854	-0.0994883	0.0279786	-0.136411	0.00252933	-0.136465	0.00251915	0.238753	9.39346e-08	0.0420837	0.35357	0.0182682	0.687274	0.0298239	0.510996	-0.0837324	0.0645715	-0.0725942	0.109231	-0.0966594	0.0327773	-0.0778789	0.0856873	-0.0173073	0.702922	-0.0793387	0.0799606	-0.0421309	0.353031
GNGT2	blue	0.409894	3.38625e-21	-0.125751	0.0054049	-0.097519	0.0312498	-0.0344502	0.447671	0.135424	0.00271971	0.0955956	0.0347554	0.533852	2.66376e-37	0.228392	3.39717e-07	-0.0543007	0.231171	0.0113147	0.803115	-0.0444367	0.32728	-0.0288721	0.524579	-0.035731	0.430959	-0.0200343	0.658864	-0.0413929	0.361535	-0.0863593	0.0565972	-0.0736897	0.103972	-0.0416498	0.358559	-0.0510316	0.260519
AQP9	blue	0.0899912	0.0469329	0.147174	0.00111173	0.219674	9.5691e-07	-0.0501715	0.268649	0.238987	9.11837e-08	0.560851	8.89684e-42	0.456987	1.49209e-26	0.153954	0.000643457	-0.053802	0.235489	0.0336455	0.458356	-0.0389818	0.3902	0.00562463	0.901367	-0.0100282	0.825118	-0.0108293	0.811399	0.0100332	0.825032	-0.0624531	0.168376	-0.0142419	0.753656	0.0646146	0.154096	-0.0372444	0.411686
CLDN3	blue	-0.144926	0.00132613	-0.1945	1.51138e-05	-0.0764336	0.091678	-0.0354095	0.43512	-0.132982	0.00324829	-0.129407	0.00419095	-0.317763	6.53835e-13	-0.221091	8.10977e-07	-0.0468161	0.302018	-0.104824	0.0205543	-0.0440166	0.331879	-0.0589879	0.193301	-0.0193868	0.669225	-0.0185697	0.682392	-0.0625409	0.167777	0.0647767	0.153063	-0.0194695	0.667899	0.0275615	0.543581	0.0670691	0.139014
GBP4	blue	0.490688	6.23643e-31	0.0753571	0.0963548	0.0256844	0.571377	-0.0338878	0.455123	0.116643	0.00991101	0.124154	0.00602798	0.550339	5.50314e-40	0.152416	0.00072988	0.0241734	0.594229	0.0593801	0.190351	-0.0247845	0.584938	0.0376097	0.407111	-0.0471457	0.298623	-0.041477	0.360558	-0.0513215	0.257816	-0.0795597	0.0791212	-0.0570848	0.208089	0.0874725	0.0534734	-0.0491415	0.278612
IGLL5	blue	0.328249	1.00843e-13	-0.0769352	0.0895622	-0.0468287	0.301887	0.0169134	0.709373	0.21032	2.77618e-06	0.000587608	0.98967	0.244211	4.6578e-08	0.0749686	0.0980886	-0.0829649	0.0670688	-0.00875826	0.846972	-0.0397981	0.380344	-0.0314442	0.488301	-0.0236525	0.602205	-0.0302988	0.504287	-0.0201529	0.656974	-0.00325926	0.942749	-0.0339275	0.454595	-0.0439988	0.332075	0.0100881	0.82409
ATP6V0D2	blue	0.271799	1.03364e-09	-0.026677	0.556595	-0.0694877	0.125288	0.018756	0.679382	0.0350807	0.439399	0.0805865	0.0753148	0.555812	6.54339e-41	0.458963	8.51671e-27	0.139185	0.00205731	-0.00119916	0.978921	-0.0331942	0.46441	-0.00542204	0.904903	0.0206873	0.648481	-0.0307384	0.498119	-0.0165602	0.715175	-0.00689863	0.879182	-0.0504029	0.266445	-0.221859	7.41043e-07	-0.0571004	0.207964
TMEM59L	blue	-0.142022	0.00165927	-0.0796411	0.0788138	-0.0142182	0.754052	-0.000804627	0.985855	-0.0553649	0.222143	-0.0425615	0.348127	-0.220062	9.14613e-07	0.010305	0.820371	-0.078489	0.0832549	-0.0693599	0.125986	-0.0341376	0.451804	-0.0449389	0.321838	-0.0216187	0.633788	-0.0349352	0.4413	-0.0064606	0.8868	-0.0216186	0.633788	-0.00913704	0.84044	-0.100067	0.0270751	0.0213698	0.6377
LCN12	blue	-0.195879	1.31082e-05	-0.0660688	0.145018	-0.0245228	0.588908	-0.018792	0.6788	-0.259746	5.76215e-09	-0.0670841	0.138926	-0.293391	3.82702e-11	-0.0626165	0.167263	-0.0231894	0.609333	-0.0942687	0.0373643	-0.0322332	0.477448	-0.0458482	0.312134	-0.0177848	0.69513	-0.01826	0.687407	-0.0596654	0.188226	0.110101	0.0149589	-0.0262869	0.562382	-0.0912627	0.0438947	-0.00585263	0.897391
CYBB	blue	0.433114	9.85498e-24	0.267291	1.98545e-09	0.155	0.000590242	-0.0365141	0.420922	0.255174	1.08137e-08	0.251327	1.81957e-08	0.831694	2.84293e-126	0.256162	9.44823e-09	-0.0830908	0.0666538	-0.0231222	0.610371	-0.0790138	0.0812076	-0.0253301	0.576698	-0.0554628	0.221325	-0.0517444	0.25391	-0.0360353	0.427042	-0.11237	0.0129977	-0.0729932	0.107292	-0.0979083	0.0305784	-0.0637045	0.159993
PAK6	blue	-0.106553	0.0185473	0.0505379	0.265165	0.0193439	0.669915	0.0233538	0.606798	-0.200412	8.14889e-06	-0.0866243	0.0558401	-0.215919	1.47579e-06	-0.162377	0.000316073	-0.071979	0.112275	0.0951686	0.0355774	0.134622	0.00288394	0.073646	0.104178	-0.0137998	0.761067	0.0444146	0.327522	-0.108731	0.0162647	-0.117811	0.00918921	0.0546491	0.228187	-0.0411052	0.364884	0.0263827	0.560958
MTG1	blue	-0.188882	2.67261e-05	0.0416464	0.358598	0.0152008	0.73766	0.0162378	0.720487	-0.217224	1.27067e-06	-0.0499568	0.270706	-0.199234	9.23031e-06	-0.0573682	0.205837	-0.0446275	0.325206	-0.0313153	0.490086	0.00868863	0.848173	0.026517	0.558965	-0.000469656	0.991743	-0.00558309	0.902092	0.0733227	0.105711	0.0657793	0.146792	0.00267821	0.952943	0.101787	0.0245367	0.0179312	0.692747
ASGR1	blue	0.170428	0.000154992	-0.107938	0.0170655	-0.0390221	0.38971	-0.0342427	0.450413	-0.0466232	0.304017	0.0113261	0.802922	0.323132	2.53354e-13	0.115804	0.0104594	-0.0074514	0.869584	-0.0697228	0.124012	-0.0595867	0.188811	-0.0255134	0.573941	0.0353297	0.436157	-0.010729	0.813114	-0.0167744	0.711655	0.00162512	0.971435	0.00343769	0.939621	-0.00893273	0.843962	-0.0467037	0.303181
2019-09-12	blue	-0.203159	6.07755e-06	-0.00533237	0.906468	-0.0107467	0.812811	-0.0192018	0.672198	-0.111007	0.0141469	-0.0423686	0.350319	-0.20323	6.03087e-06	-0.102094	0.0241059	0.0101268	0.823426	-0.0340502	0.452964	0.0050441	0.911503	0.0284637	0.530464	0.0187851	0.678912	0.0199498	0.660213	-0.0129763	0.77493	0.15466	0.000607076	0.0552582	0.223036	0.109259	0.0157504	0.011626	0.797814
GRHL1	blue	-0.106897	0.018169	0.136652	0.00248472	0.025043	0.581027	-0.0386022	0.394835	-0.118153	0.008987	-0.0801423	0.0769428	-0.158463	0.00044172	-0.155977	0.000544214	-0.123388	0.0063492	0.10794	0.0170635	0.15825	0.000449746	0.0297494	0.512053	-0.0778062	0.0859809	-0.0480606	0.289335	-0.058264	0.198833	-0.122182	0.00688611	0.152032	0.000753081	0.0529598	0.242911	0.150174	0.000875227
IL13	blue	0.216385	1.39917e-06	0.0588002	0.194724	-0.0457735	0.312924	0.0586544	0.195835	-0.0125497	0.78214	0.00377445	0.933719	0.201961	6.91043e-06	0.0368511	0.416645	0.00667912	0.882998	-0.0393085	0.386238	-0.042157	0.352732	-0.0112907	0.803525	-0.0236031	0.602962	-0.0295863	0.514369	-0.0226627	0.617487	-0.0262769	0.56253	-0.0495787	0.274353	-0.105179	0.0201271	-0.0221296	0.625787
SLC16A14	blue	-0.226635	4.19966e-07	-0.0692734	0.12646	0.030619	0.499791	-0.104307	0.0211889	-0.115481	0.0106779	-0.0814413	0.072261	-0.334364	3.27788e-14	-0.0953361	0.0352531	-0.053081	0.241834	-0.060478	0.18227	-0.00155805	0.972614	-0.0258378	0.56908	-0.0183671	0.685672	-0.0312625	0.490818	-0.0464145	0.306189	0.0250701	0.580617	-0.0132965	0.769531	0.150695	0.000839249	0.00677532	0.881325
FERMT3	blue	0.631045	1.44766e-55	-0.159984	0.000388187	-0.0709412	0.117561	-5.55314e-05	0.999024	0.197426	1.11588e-05	0.0995652	0.027857	0.851766	1.55495e-138	0.338538	1.50021e-14	0.083839	0.0642309	-0.0781586	0.0845651	-0.0879194	0.0522603	-0.0478785	0.291168	-0.0496289	0.273867	-0.0699435	0.122824	-0.0491248	0.278776	-0.0842222	0.0630184	-0.106089	0.0190682	-0.134915	0.00282291	-0.0519287	0.252221
TRAF2	blue	-0.0972396	0.0317395	-0.222465	6.89999e-07	-0.0386093	0.394748	-0.124712	0.00580345	-0.203162	6.07547e-06	-0.150122	0.000878918	-0.318644	5.60366e-13	-0.203419	5.90955e-06	0.0168096	0.711077	-0.0348946	0.441832	0.0447665	0.3237	-0.00577791	0.898694	-0.0560398	0.216549	-0.0403852	0.373352	-0.0649783	0.151786	0.0953459	0.0352342	-0.0367115	0.418414	0.18702	3.21663e-05	0.0148344	0.743758
RASGRP2	blue	0.390652	3.06308e-19	0.0186249	0.6815	-0.0814092	0.0723739	0.222824	6.61404e-07	-0.00928949	0.837815	0.159632	0.000400013	0.482061	9.17509e-30	0.525922	4.62497e-36	-0.0975389	0.0312152	-0.0963161	0.0334049	-0.0671148	0.138745	-0.0386472	0.394285	-0.0476616	0.293361	-0.0586059	0.196205	-0.0318056	0.483313	-0.0498411	0.271818	-0.0728479	0.107995	-0.357305	3.84855e-16	-0.0146678	0.746537
SIGLEC7	blue	0.450452	9.29086e-26	-0.104056	0.0215039	-0.0281723	0.534683	-0.0670405	0.139183	0.212633	2.1427e-06	0.158568	0.000437827	0.820464	4.23495e-120	0.34805	2.41623e-15	-0.038591	0.394973	-0.0295248	0.515245	-0.0752504	0.0968285	-0.0202197	0.655909	-0.0224907	0.620159	-0.053314	0.239771	-0.032412	0.475007	-0.0894221	0.0483488	-0.0677033	0.135308	-0.0979072	0.0305802	-0.050101	0.269323
SIGLEC1	blue	0.385748	9.21853e-19	-0.00455406	0.92007	-0.0680513	0.133307	0.0270664	0.550846	0.0894063	0.0483887	0.258033	7.30547e-09	0.718346	1.30061e-78	0.450337	9.59125e-26	-0.0711896	0.116278	-0.036297	0.423691	-0.0728285	0.108089	-0.00387603	0.931939	-0.058502	0.197001	-0.0507233	0.263413	-0.033154	0.464951	-0.072644	0.108987	-0.0706192	0.119239	-0.178424	7.39385e-05	-0.022491	0.620154
ADSSL1	blue	-0.18278	4.87253e-05	-0.160436	0.000373489	-0.0118663	0.793728	-0.0845257	0.0620715	-0.1499	0.000894756	-0.115894	0.0103997	-0.329121	8.60458e-14	-0.17289	0.000123832	0.00112892	0.980155	0.00301324	0.947064	-0.0182973	0.686802	-0.0331097	0.465548	-0.0435721	0.33679	-0.0429536	0.3437	-0.0763478	0.0920439	0.0563246	0.21422	-0.0611918	0.177154	0.100666	0.0261669	-0.00381926	0.932934
SRCIN1	blue	-0.140272	0.00189551	-0.0662176	0.144112	-0.0877099	0.0528261	0.0673068	0.137616	-0.246008	3.68365e-08	-0.0965658	0.0329474	-0.28009	3.01485e-10	-0.166471	0.000220903	-0.100527	0.026375	-0.132651	0.00332654	-0.0621571	0.170406	-0.0521814	0.249916	0.0580689	0.200343	0.049751	0.272686	0.00645626	0.886875	0.176558	8.81288e-05	0.0429039	0.344259	-0.0329936	0.467115	0.0433544	0.339212
ADA2	blue	0.435234	5.65256e-24	-0.071731	0.11352	-0.132962	0.00325278	0.048357	0.286367	0.0969571	0.0322412	0.215532	1.54249e-06	0.618305	8.40435e-53	0.452273	5.60221e-26	-0.0710667	0.116911	-0.033613	0.45879	-0.0544755	0.22967	-0.0422301	0.351897	-0.0336814	0.457876	0.0534761	0.238342	-0.0508757	0.261979	0.023624	0.602641	-0.0741186	0.101968	-0.243298	5.24394e-08	-0.02239	0.621727
PLA2G4A	blue	-0.224747	5.26492e-07	-0.0780119	0.0851523	0.10866	0.0163351	-0.0920233	0.0421575	-0.0419025	0.355649	-0.0776639	0.0865579	-0.313993	1.25797e-12	-0.129132	0.00427306	-0.0153076	0.735884	-0.0741999	0.101592	-0.0409642	0.366532	-0.0532421	0.240406	-0.0305678	0.500508	-0.0453443	0.317488	-0.0502377	0.268017	-0.0218669	0.629896	-0.0425159	0.348645	0.0265521	0.558444	-0.0120304	0.790942
NFATC4	blue	-0.182245	5.13133e-05	-0.0549902	0.225292	-0.0067154	0.882367	-0.0423653	0.350355	-0.0491502	0.278527	-0.0780546	0.0849811	-0.258671	6.68939e-09	-0.183704	4.45461e-05	-0.157799	0.000467174	-0.111593	0.0136421	-0.0139543	0.758474	-0.0774973	0.0872374	0.0573804	0.20574	-0.0331501	0.465003	0.312624	1.59169e-12	0.00228897	0.959775	0.016586	0.714752	0.101629	0.0247613	0.0778954	0.0856208
BCL2A1	blue	0.38282	1.76389e-18	-0.03031	0.50413	0.106545	0.0185567	-0.0777583	0.0861749	0.202148	6.77313e-06	0.00522639	0.908319	0.6052	4.34684e-50	0.0672685	0.13784	0.000743874	0.986923	0.0446033	0.325468	-0.047684	0.293134	-0.011723	0.796164	-0.0185317	0.683007	-0.0428789	0.34454	-0.0526749	0.245459	-0.0999605	0.0272394	-0.0735677	0.104547	0.108331	0.0166647	-0.0594474	0.189848
GPR84	blue	0.408411	4.84258e-21	-0.0726595	0.108912	-0.0358242	0.429758	-0.105708	0.0195054	0.305407	5.39512e-12	0.037622	0.406958	0.502548	1.36278e-32	-0.0544797	0.229634	-0.108867	0.0161306	-0.000420942	0.9926	-0.0600093	0.185688	-0.0282306	0.533838	-0.0534069	0.238952	-0.0401273	0.376413	-0.031341	0.489729	-0.102143	0.0240377	-0.0482413	0.287522	0.118527	0.00877049	-0.00924088	0.838652
MATK	blue	0.460258	5.8857e-27	-0.156122	0.000537695	-0.0686654	0.129831	0.0333787	0.461929	0.180153	6.27283e-05	0.0498936	0.271313	0.625807	2.05415e-54	0.296815	2.21015e-11	0.0123023	0.786329	-0.0461268	0.3092	-0.0824561	0.0687677	-0.0376617	0.406463	-0.0300351	0.508007	-0.0545341	0.229169	-0.0477226	0.292743	-0.117747	0.00922739	-0.104321	0.0211717	-0.127828	0.00468131	-0.0608271	0.179754
DDO	blue	0.223403	6.17621e-07	-0.0577771	0.202617	-0.0648515	0.152588	0.116784	0.00982103	-0.0115078	0.799826	0.0352309	0.437442	0.333879	3.58676e-14	0.17035	0.000156094	0.0315699	0.486562	-0.0335482	0.459657	-0.00936322	0.836545	-0.0351476	0.438526	-0.0324812	0.474064	-0.0222316	0.624195	-0.0558086	0.218454	-0.0259764	0.567009	-0.0850368	0.0605034	-0.181943	5.2829e-05	-0.026368	0.561176
C11orf21	blue	0.356518	4.51028e-16	0.116042	0.0103013	-0.0628389	0.165757	0.147213	0.00110832	-0.0676945	0.135359	0.186275	3.46246e-05	0.469852	3.62538e-28	0.38133	2.44815e-18	-0.055235	0.223231	-0.0865152	0.0561507	-0.0595618	0.188996	-0.0466178	0.304073	-0.0532554	0.240288	-0.0602603	0.183852	-0.0502116	0.268266	-0.0741975	0.101603	-0.0819459	0.0705061	-0.2631	3.6033e-09	0.00702879	0.87692
TNFAIP3	blue	0.314385	1.1756e-12	0.166025	0.000229771	0.0775474	0.0870327	0.0734954	0.10489	0.243068	5.40239e-08	0.0600915	0.185086	0.466764	8.97775e-28	0.206708	4.13559e-06	-0.053961	0.234106	0.059179	0.191859	0.0392811	0.386569	0.027145	0.54969	-0.0471855	0.298215	-0.0140992	0.756046	-0.0196371	0.665213	-0.0685122	0.130692	-0.0603656	0.183085	0.0503263	0.267173	-0.0163338	0.718904
LCP1	blue	0.503715	9.28057e-33	0.00959039	0.832637	0.0125032	0.782926	-0.00936722	0.836476	0.216772	1.33844e-06	0.114741	0.0111935	0.788301	1.42471e-104	0.260618	5.10367e-09	-0.0544099	0.230232	0.0353417	0.436001	-0.0257287	0.570714	-0.0298384	0.51079	-0.0186724	0.680732	0.0315448	0.486909	-0.0370462	0.41418	-0.0979092	0.0305768	-0.076928	0.0895921	-0.073303	0.105805	-0.0781034	0.0847854
CACNB3	blue	-0.138527	0.00216139	-0.183695	4.45858e-05	-0.108149	0.0168497	-0.0566681	0.211433	-0.12367	0.00622938	-0.107317	0.0177168	-0.322123	3.03195e-13	-0.140318	0.00188886	-0.0182407	0.68772	-0.103632	0.0220448	-0.0706502	0.119077	-0.0808381	0.0744052	-0.0141826	0.754649	-0.0487225	0.282736	-0.00835496	0.853937	0.0594091	0.190134	-0.0558475	0.218132	-0.116019	0.0103168	0.00709344	0.875797
MS4A4A	blue	0.401344	2.59939e-20	-0.00675414	0.881693	0.0128228	0.777521	-0.0608067	0.179901	0.239254	8.81399e-08	0.194592	1.4972e-05	0.802099	6.99492e-111	0.312916	1.51396e-12	-0.0663581	0.143262	-0.0223955	0.621642	-0.0747951	0.0988707	-0.0228598	0.61443	-0.0297456	0.512107	-0.0496942	0.273236	-0.0324804	0.474075	-0.102263	0.0238715	-0.0718786	0.112778	-0.0880006	0.0520426	-0.0299169	0.509679
EMP3	blue	0.360576	1.98144e-16	-0.192132	1.92574e-05	-0.0903218	0.0461264	-0.041611	0.359008	0.358091	3.28325e-16	0.167368	0.00020399	0.520429	3.19643e-35	0.189715	2.45874e-05	-0.0301324	0.506632	0.0493149	0.276918	-0.06588	0.146173	-0.0128338	0.777336	-0.0466336	0.303909	-0.035908	0.428678	0.0034681	0.939088	-0.119306	0.00833404	-0.0611088	0.177744	0.0712656	0.115888	-0.0467	0.30322
HOXC11	blue	-0.215478	1.55216e-06	-0.0758155	0.0943406	-0.0335472	0.45967	-0.0505547	0.265005	-0.0586198	0.1961	-0.0539297	0.234378	-0.254865	1.12789e-08	-0.152655	0.000715761	0.113203	0.0123367	-0.0586938	0.195534	-0.00292996	0.948525	0.00502287	0.911874	0.0605916	0.181449	0.058705	0.195449	-0.0219369	0.628799	0.0373445	0.410429	0.037334	0.410561	0.158426	0.000443113	0.0339443	0.454372
JAK3	blue	0.527851	2.32555e-36	0.0391683	0.387935	-0.0391272	0.388433	-0.00263188	0.953756	0.147472	0.00108583	0.0330274	0.466659	0.487518	1.69001e-30	0.107641	0.0173746	-0.132654	0.00332596	-0.0285401	0.52936	-0.053008	0.242483	-0.053792	0.235577	-0.0720574	0.111883	-0.0556008	0.220176	-0.00976772	0.82959	-0.067615	0.13582	-0.0708212	0.118184	-0.0684574	0.131001	-0.0079286	0.861314
HCST	blue	0.583442	7.50018e-46	-0.204578	5.21477e-06	-0.0847274	0.0614485	-0.0362328	0.424511	0.11522	0.0108577	0.0412914	0.362713	0.656885	1.37932e-61	0.159	0.000422081	-0.0401729	0.37587	-0.0594551	0.189791	-0.0779445	0.085423	-0.0378755	0.403802	-0.0482277	0.287659	-0.0639769	0.15821	-0.0718544	0.1129	-0.107653	0.0173621	-0.108785	0.0162119	-0.0491478	0.278551	-0.0336707	0.458019
SLC39A4	blue	-0.0874939	0.0534149	-0.248041	2.81861e-08	-0.0710011	0.11725	-0.11602	0.0103155	-0.190412	2.29205e-05	-0.145549	0.00126314	-0.322172	3.00564e-13	-0.182412	5.04906e-05	0.00597403	0.895274	-0.0385593	0.395361	-0.0423854	0.350127	-0.048832	0.281655	-0.0265356	0.558689	-0.0603069	0.183512	-0.0890832	0.0492089	0.0207384	0.64767	-0.0383452	0.397992	0.0423994	0.349968	0.0232166	0.608913
NANOS1	blue	-0.095329	0.0352667	0.0051772	0.909178	-0.060604	0.18136	-0.0472373	0.297685	0.0434286	0.338386	-0.0509979	0.260834	-0.138166	0.00222049	-0.10698	0.0180791	-0.211436	2.45088e-06	-0.0203565	0.653732	-0.040534	0.371591	0.0595763	0.188888	-0.0326981	0.471116	-0.0454545	0.316312	0.0849953	0.0606294	0.0581196	0.19995	0.0269743	0.552203	0.00833988	0.854198	0.0776328	0.0866844
LRRC25	blue	0.47868	2.57757e-29	-0.126028	0.00530276	-0.0159407	0.725393	-0.0738388	0.103272	0.298987	1.55422e-11	0.187212	3.15631e-05	0.81573	1.2635e-117	0.265989	2.39175e-09	-0.0634123	0.161921	-0.0242664	0.592811	-0.0623976	0.168755	-0.0340896	0.452441	-0.027193	0.548983	-0.0482977	0.286959	-0.0271	0.550352	-0.0843192	0.0627145	-0.0698066	0.123559	-0.0660178	0.145329	-0.0301938	0.505767
CRLF1	blue	-0.188484	2.78098e-05	-0.087559	0.0532369	0.00138761	0.975609	-0.0288336	0.525133	-0.0269282	0.552883	-0.0468413	0.301758	-0.251305	1.82481e-08	-0.0156297	0.73054	-0.0920058	0.0421968	-0.0751724	0.0971762	-0.0360591	0.426737	-0.0502903	0.267516	-0.0177035	0.696455	-0.038535	0.395659	0.0178474	0.694111	-0.019862	0.661616	-0.0065248	0.885683	-0.0209848	0.643772	0.0424629	0.349246
CD53	blue	0.617186	1.44948e-52	0.0606927	0.18072	0.0349677	0.440875	-0.0248098	0.584554	0.25702	8.39934e-09	0.150974	0.000820555	0.915849	9.9798e-195	0.290613	5.9426e-11	-0.0997271	0.0276027	-0.0245944	0.58782	-0.079631	0.0788519	-0.0446136	0.325358	-0.0412098	0.363664	-0.0708047	0.11827	-0.0622736	0.169605	-0.10714	0.0179069	-0.106789	0.0182875	-0.124679	0.00581651	-0.052003	0.251541
DOCK8	blue	0.392639	1.95007e-19	0.414924	9.92975e-22	0.0949992	0.0359082	0.0855222	0.0590446	0.136566	0.00250047	0.14476	0.00134332	0.667429	3.22285e-64	0.332051	5.02934e-14	-0.102993	0.022881	-0.0418747	0.355968	-0.0874948	0.0534124	0.0137465	0.761961	-0.0929846	0.0400455	-0.0789903	0.0812983	-0.0648845	0.152379	-0.143624	0.00146703	-0.0954694	0.0349967	-0.332218	4.8768e-14	-0.051911	0.252382
DUSP4	blue	-0.197939	1.0575e-05	-0.0958646	0.0342457	0.0172301	0.704184	-0.0863487	0.0566275	-0.0613986	0.175692	-0.0822915	0.0693246	-0.305965	4.9149e-12	-0.10299	0.0228854	0.105358	0.0199144	-0.0412372	0.363345	-0.0206674	0.648797	-0.0406601	0.370104	-0.0122117	0.787865	-0.0267453	0.555585	-0.0383921	0.397415	0.121823	0.0070539	-0.0228855	0.614032	0.186805	3.28597e-05	0.030699	0.49867
PPP1R16B	blue	0.467763	6.7007e-28	0.152176	0.000744305	-0.0141623	0.754988	0.127158	0.00490454	0.104908	0.020452	0.197278	1.13322e-05	0.588593	7.96053e-47	0.427801	3.90329e-23	-0.103126	0.0227046	-0.0130564	0.773577	-0.0320681	0.479708	-0.0388513	0.39179	-0.0408009	0.368448	-0.0556108	0.220093	0.195012	1.4337e-05	-0.0168095	0.711079	-0.0601388	0.184739	-0.221585	7.65335e-07	-0.0431608	0.341375
KRTAP5-1	blue	-0.179042	6.97304e-05	-0.0759642	0.0936945	-0.0572839	0.206505	-0.005061	0.911208	-0.203898	5.61224e-06	-0.119067	0.00846568	-0.345881	3.68411e-15	-0.157439	0.000481559	0.00608642	0.893316	-0.104352	0.0211328	-0.0446066	0.325433	-0.0693561	0.126007	0.00416092	0.92695	-0.0059123	0.89635	-0.0578614	0.201959	0.156857	0.000505631	-0.0455587	0.315203	-0.0573113	0.206287	0.0367537	0.417879
ITGAX	blue	0.403562	1.54047e-20	0.089552	0.0480225	-0.0230882	0.610896	0.0456918	0.313789	0.13637	0.00253699	0.127345	0.00484139	0.707821	2.20677e-75	0.41368	1.34779e-21	-0.0753028	0.0965956	-0.0611623	0.177364	-0.0652357	0.150167	-0.0240107	0.596716	-0.0507408	0.263248	-0.0549851	0.225335	-0.0418094	0.356719	-0.0663197	0.143494	-0.0777317	0.0862825	-0.188777	2.70098e-05	-0.0362118	0.424781
SIGLEC14	blue	0.445604	3.51703e-25	-0.0376054	0.407164	-0.0793811	0.0797988	0.0118712	0.793646	0.161723	0.000334428	0.131452	0.00362531	0.727404	1.63542e-81	0.383398	1.55273e-18	-0.0682839	0.131982	0.00464696	0.918445	-0.069086	0.127492	-0.0027463	0.951748	-0.054288	0.23128	-0.0606246	0.181211	-0.0517272	0.254068	-0.101953	0.0243021	-0.0771715	0.0885786	-0.150407	0.000858981	-0.0544395	0.229979
OPLAH	blue	-0.251082	1.88023e-08	-0.189691	2.46454e-05	-0.00951415	0.833949	-0.0695933	0.124714	-0.229195	3.08146e-07	-0.113345	0.0122266	-0.415252	9.16149e-22	-0.162667	0.000308228	0.00549556	0.903619	-0.0581397	0.199794	-0.00957737	0.832861	-0.0608459	0.17962	-0.0555068	0.220958	0.0415195	0.360066	-0.0910139	0.0444757	-0.0415428	0.359797	-0.0368003	0.417288	-0.00900317	0.842747	0.02957	0.514601
C19orf38	blue	0.357637	3.59868e-16	-0.119072	0.0084629	-0.0258508	0.568885	-0.0483645	0.286293	0.156204	0.000534009	0.0457108	0.313588	0.457704	1.21777e-26	0.115824	0.0104465	-0.0626344	0.167142	-0.039518	0.383709	-0.0658102	0.146602	-0.0266427	0.557103	0.0769486	0.089506	-0.0367244	0.41825	-0.0300884	0.507253	-0.0215637	0.634651	-0.050301	0.267414	-0.0300108	0.50835	-0.0228736	0.614216
SRMS	blue	-0.208472	3.40711e-06	-0.118227	0.00894355	-0.020894	0.645207	-0.100077	0.0270599	-0.074845	0.0986454	-0.0765797	0.0910575	-0.247751	2.92843e-08	-0.134438	0.00292287	0.150795	0.00083249	0.00819847	0.856643	0.00804874	0.859234	-0.0145682	0.7482	-0.0140523	0.756831	-0.0129719	0.775005	-0.0522279	0.249494	0.00794608	0.861011	0.0523066	0.248781	0.113029	0.0124722	0.00771485	0.865016
HSF4	blue	-0.164915	0.000253359	-0.0593221	0.190785	-0.0416011	0.359122	0.0455423	0.315377	-0.250616	2.00112e-08	-0.0711984	0.116233	-0.248752	2.56523e-08	-0.0925731	0.0409385	-0.0569181	0.209423	-0.0813884	0.072447	-0.0412085	0.36368	-0.0480679	0.289261	-0.0187629	0.67927	-0.00594603	0.895762	-0.0725323	0.109534	0.0648238	0.152764	-0.0363371	0.423179	-0.0829044	0.0672689	0.0415309	0.359935
SCRIB	blue	-0.181201	5.67406e-05	-0.213307	1.98589e-06	-0.0638975	0.158728	-0.105377	0.0198929	-0.204433	5.29734e-06	-0.139451	0.00201658	-0.35924	2.60099e-16	-0.218389	1.11082e-06	-0.060541	0.181814	0.00615361	0.892145	0.0165246	0.715761	-0.0554313	0.221588	0.0384879	0.396238	-0.00394036	0.930813	0.0213858	0.637448	0.226633	4.20085e-07	0.0419688	0.354887	0.225918	4.57709e-07	0.10268	0.0233007
EFNA5	blue	-0.0637826	0.15948	0.0681215	0.132906	-0.000130241	0.99771	-0.0659305	0.145863	0.0168016	0.711209	-0.00882834	0.845763	-0.129059	0.00429484	-0.144616	0.00135842	0.0673412	0.137415	0.0187682	0.679185	-0.0542716	0.231421	-0.0524303	0.247661	-0.0907078	0.0451996	-0.0717241	0.113555	-0.0315157	0.487311	-0.121675	0.00712375	-0.0946092	0.0366795	-0.0520772	0.250865	-0.0126275	0.780824
FCGR3A	blue	0.457624	1.24602e-26	-0.0162171	0.720829	0.0507654	0.263016	-0.110484	0.0146105	0.329259	8.39073e-14	0.0689606	0.128186	0.76676	1.29869e-95	0.155232	0.000578994	-0.118689	0.00867825	-0.0134573	0.766823	-0.0737039	0.103905	-0.0181925	0.688503	-0.0306936	0.498746	-0.0465724	0.304544	-0.0392047	0.387494	-0.0926912	0.0406804	-0.0558439	0.218162	0.0746887	0.0993528	-0.0168852	0.709836
GPR65	blue	0.439568	1.79161e-24	0.369952	2.83132e-17	0.193217	1.72399e-05	0.000764445	0.986561	0.159655	0.000399236	0.144591	0.00136114	0.752828	2.56207e-90	0.248068	2.80836e-08	-0.107728	0.0172833	-0.0391521	0.388131	-0.0823148	0.0692455	-0.0339893	0.453774	-0.0504886	0.265631	-0.0650678	0.151222	-0.0545363	0.22915	-0.106616	0.0184774	-0.0821625	0.0697638	-0.131315	0.00366088	-0.0454518	0.316341
HOXC10	blue	-0.2288	3.23313e-07	-0.0861599	0.0571723	-0.0354571	0.434503	-0.096134	0.033742	-0.0598872	0.186586	-0.0558251	0.218317	-0.254595	1.17007e-08	-0.153209	0.000684048	0.0813918	0.072435	-0.046113	0.309344	-0.00291074	0.948862	0.0686259	0.130053	0.0418485	0.356269	0.127385	0.0048278	-0.0189303	0.67657	0.0621049	0.170766	0.0754346	0.0960119	0.184887	3.96875e-05	0.0285521	0.529188
PTK6	blue	-0.0452788	0.318188	-0.170348	0.000156121	-0.0528429	0.243955	-0.0552777	0.222872	-0.163289	0.000292029	-0.121255	0.00732598	-0.244472	4.50236e-08	-0.124667	0.00582123	0.280623	2.78134e-10	0.096829	0.032471	-0.00808084	0.858678	-0.0668854	0.140102	-0.0995188	0.0279303	-0.0820824	0.0700376	-0.123351	0.00636529	-0.139323	0.00203608	-0.113254	0.0122968	-0.0861504	0.0571999	-0.0690723	0.127568
TNNI2	blue	0.138739	0.00212732	-0.0627538	0.166332	-0.0523702	0.248205	0.0506822	0.263801	0.0441474	0.330444	-0.00554284	0.902794	0.176219	9.09681e-05	0.0729645	0.107431	0.0700039	0.1225	-0.0107506	0.812745	-0.0204419	0.652375	-0.00754821	0.867905	-0.0309006	0.495853	-0.0342445	0.450389	-0.0301769	0.506005	-0.0630794	0.16414	-0.0599549	0.186088	-0.102011	0.0242208	0.0913417	0.0437115
LAIR1	blue	0.529624	1.23129e-36	-0.00746113	0.869415	-0.00956107	0.833142	0.0300017	0.508479	0.226249	4.39889e-07	0.137284	0.00237102	0.889383	2.53428e-167	0.370569	2.48546e-17	-0.111373	0.013829	-0.0308216	0.496957	-0.0829567	0.0670958	-0.0310084	0.49435	-0.0420346	0.354133	-0.0619904	0.171557	-0.0484684	0.285257	-0.110513	0.014584	-0.0927155	0.0406276	-0.133243	0.00318752	-0.0458613	0.311995
MAP10	blue	-0.205187	4.88139e-06	0.0324693	0.474226	0.0282538	0.533501	-0.025061	0.580755	-0.0945456	0.0368066	-0.0344342	0.447881	-0.164165	0.000270562	-0.068635	0.130002	-0.0417944	0.356892	-0.0226535	0.617629	-0.00086215	0.984844	0.0260379	0.566091	0.0495885	0.274258	0.128377	0.00450527	0.0703013	0.120915	-0.0235757	0.603383	0.00062639	0.988988	-0.0149701	0.741498	-0.00240541	0.957731
SLC4A3	blue	-0.169971	0.000161529	-0.113527	0.0120871	-0.053368	0.239294	-0.033115	0.465477	-0.058228	0.19911	-0.0134956	0.76618	-0.254021	1.265e-08	-0.0740364	0.10235	-0.0424841	0.349005	0.0154083	0.734212	0.0381432	0.400485	-0.0200366	0.658828	-0.00834225	0.854157	0.0850179	0.0605606	0.0316827	0.485005	0.0236172	0.602745	0.0178993	0.693267	0.0515234	0.255946	0.015463	0.733304
THPO	blue	-0.234245	1.65548e-07	-0.0600843	0.185138	-0.00725339	0.87302	-0.0841178	0.0633469	-0.166361	0.000223049	-0.074778	0.098948	-0.313492	1.3711e-12	-0.157544	0.000477325	-0.0422189	0.352025	-0.103977	0.021603	-0.0294087	0.516899	0.0868889	0.0550927	0.0252508	0.577891	-0.0153345	0.735438	-0.0194159	0.668759	0.243845	4.88452e-08	0.0204972	0.651496	0.155786	0.000552947	0.045087	0.320245
SMOC1	blue	-0.183964	4.34311e-05	-0.0881578	0.0516229	-0.0211917	0.640505	-0.068434	0.131133	-0.0414812	0.360511	-0.0529976	0.242575	-0.230988	2.47561e-07	-0.0944974	0.0369032	0.121285	0.00731177	-0.0132254	0.770729	-0.00882385	0.84584	-0.0126311	0.780762	0.0201701	0.6567	0.0223611	0.622176	0.111647	0.013596	0.209119	3.17192e-06	0.0189572	0.676135	0.191245	2.10715e-05	-0.0142564	0.753414
IRF8	blue	0.584416	4.92372e-46	0.0710917	0.116782	-0.0042596	0.925223	0.0678497	0.134463	0.105357	0.0199166	0.161125	0.000352087	0.821427	1.30258e-120	0.446576	2.69753e-25	-0.0214542	0.636372	-0.0566556	0.211535	-0.0718863	0.112739	-0.0269007	0.553288	-0.0381369	0.400562	-0.0636435	0.160393	-0.0491881	0.278156	-0.0784478	0.0834171	-0.104302	0.0211951	-0.268419	1.68808e-09	-0.0661148	0.144738
RUFY4	blue	0.153471	0.000669523	-0.00831226	0.854675	-0.0532188	0.240612	0.00663642	0.883741	-0.133229	0.00319091	-0.0292365	0.519358	0.0826896	0.0679835	-0.0866307	0.055822	-0.0372516	0.411596	-0.0538792	0.234817	-0.023617	0.602749	-0.0424381	0.349528	-0.0116885	0.796751	0.00106977	0.981195	-0.0449546	0.321669	-0.0136494	0.763594	-0.0357404	0.430838	-0.0318476	0.482735	0.00480851	0.915621
CD300E	blue	0.114983	0.0110223	0.0497753	0.272452	0.0360893	0.42635	-0.0363287	0.423286	0.172661	0.00012646	0.139663	0.00198472	0.355847	5.16115e-16	0.171265	0.000143649	-0.0634727	0.161521	0.00146983	0.974164	-0.0373135	0.410819	0.0153017	0.735982	-0.0219024	0.62934	-0.0163278	0.719002	0.00415879	0.926988	-0.0563565	0.21396	-0.015999	0.724428	0.0293019	0.518423	-0.0230186	0.611973
SRRM5	blue	-0.227192	3.92722e-07	0.0561172	0.215914	-0.0533103	0.239803	0.0546009	0.228598	-0.21329	1.98975e-06	-0.0742631	0.1013	-0.297417	2.00511e-11	-0.151408	0.000792243	-0.0593768	0.190376	-0.0280217	0.53687	0.0526354	0.245814	-0.00782469	0.863113	0.0432903	0.339927	0.0513213	0.257818	-0.0407793	0.368701	0.105	0.0203415	0.0167379	0.712255	0.068452	0.131031	0.0605698	0.181606
CHML	blue	-0.288753	7.95823e-11	0.214044	1.82702e-06	0.122792	0.00660979	-0.133755	0.00307151	-0.0663268	0.143451	-0.0594773	0.189625	-0.309873	2.54465e-12	-0.0801218	0.0770187	-0.0519866	0.251691	-0.0532106	0.240685	-0.0282039	0.534224	0.148593	0.000993377	0.0514617	0.256517	0.0555054	0.22097	-0.0321737	0.478262	0.0744999	0.100213	0.0827307	0.0678465	0.19375	1.63243e-05	-0.0159135	0.725842
MZB1	blue	0.357185	3.9425e-16	-0.101704	0.0246537	-0.0208781	0.64546	-0.00110251	0.980619	0.194393	1.52809e-05	-0.0046423	0.918527	0.321105	3.63207e-13	0.0681612	0.13268	-0.0553682	0.222115	-0.0208336	0.646163	-0.0508613	0.262115	-0.0510978	0.2599	-0.00992635	0.826866	-0.029334	0.517964	-0.0298587	0.510503	0.0274151	0.545724	-0.0469496	0.300641	-0.0177824	0.69517	0.0113256	0.80293
PRF1	blue	0.458191	1.06077e-26	-0.0897799	0.0474545	-0.0321092	0.479145	-0.0293549	0.517665	0.0199599	0.660052	0.0293905	0.517159	0.461037	4.70885e-27	0.136061	0.00259533	-0.0372788	0.411254	-0.019543	0.666721	-0.0486058	0.283892	-0.0276649	0.542069	-0.0364178	0.422149	-0.0466425	0.303816	-0.0649412	0.15202	-0.0694783	0.125339	-0.0651644	0.150615	-0.0204549	0.652168	-0.0397563	0.380845
HCAR1	blue	-0.152068	0.000750852	-0.0496076	0.274073	-0.00102291	0.982018	-0.0585551	0.196594	-0.102339	0.0237659	-0.0352362	0.437373	-0.208037	3.57438e-06	-0.11772	0.00924367	0.05219	0.249838	-0.0604003	0.182833	-0.0122706	0.786867	-0.0410828	0.365146	0.00879915	0.846266	-0.0066432	0.883623	-0.0227163	0.616654	0.0345335	0.446573	0.087973	0.0521165	0.0655435	0.148249	0.12313	0.00646081
TFAP2C	blue	-0.121424	0.00724409	-0.0238981	0.598439	-0.0518926	0.25255	-0.0490697	0.279317	-0.117994	0.00908027	-0.08318	0.0663611	-0.220473	8.71745e-07	-0.21107	2.55316e-06	-0.139333	0.00203463	0.0848152	0.0611791	0.156108	0.000538292	0.196297	1.25507e-05	-0.0404825	0.3722	0.0274235	0.545602	-0.0796579	0.0787505	-0.155765	0.000553922	-0.0223531	0.622302	0.0681926	0.132501	0.0937394	0.0384504
HOXC9	blue	-0.236378	1.26789e-07	-0.0585642	0.196524	-0.0314997	0.487533	-0.0913912	0.0435971	-0.0251774	0.578998	-0.0523893	0.248032	-0.279007	3.54946e-10	-0.153239	0.000682373	0.0908638	0.0448295	-0.0270978	0.550384	-0.000370755	0.993482	0.0382299	0.399414	0.236732	1.21265e-07	0.122574	0.00670734	0.00417696	0.92667	0.110505	0.014592	0.125767	0.00539909	0.20278	6.32956e-06	0.0401531	0.376106
CCL25	blue	0.206322	4.31392e-06	-0.0650038	0.151625	-0.0251987	0.578676	-0.0237502	0.600705	-0.0196719	0.664656	-0.0277467	0.540875	0.123781	0.0061828	-0.0751856	0.0971169	-0.0657132	0.147199	-0.0331317	0.465252	-0.033111	0.465531	0.0476475	0.293505	-0.00182245	0.967969	-0.0165421	0.715473	-0.036348	0.423039	0.0220833	0.62651	-0.0232887	0.607801	0.0179093	0.693104	-0.00628112	0.889924
STRC	blue	-0.158195	0.000451844	0.043844	0.333781	-0.0140564	0.756762	0.0527006	0.245229	-0.171953	0.000134917	-0.0144929	0.749458	-0.180473	6.08419e-05	-0.103892	0.0217113	0.0124977	0.783019	-0.0039043	0.931444	0.0236817	0.601756	0.0589324	0.193721	0.0381655	0.400209	0.0316848	0.484976	-0.0332527	0.463622	0.164008	0.000274313	0.0197039	0.664144	0.0944823	0.0369335	0.0575915	0.204074
CCR8	blue	0.445039	4.10133e-25	0.104832	0.0205445	0.0961963	0.0336262	-0.0309046	0.495798	0.278717	3.70807e-10	0.0483581	0.286356	0.550233	5.73139e-40	0.124632	0.00583528	-0.0978816	0.030624	-0.0396942	0.38159	-0.00386068	0.932208	-0.0581296	0.199872	-0.0699482	0.122798	-0.051393	0.257153	-0.0470944	0.29915	-0.0658389	0.146425	-0.0973055	0.0316234	-0.120757	0.00757273	-0.0529823	0.242711
SERPINA9	blue	0.202853	6.28068e-06	-0.0373251	0.410673	-0.0406466	0.370264	0.0654401	0.148891	0.0420255	0.354237	0.0229858	0.612479	0.226826	4.10433e-07	0.13201	0.00348344	-0.0426449	0.347182	-0.0214135	0.637011	-0.0304653	0.501947	-0.0234208	0.605766	-0.0278052	0.540022	-0.0213568	0.637904	-0.0156208	0.730688	-0.0380597	0.401517	-0.0468902	0.301253	-0.152348	0.000733927	-0.0273783	0.546264
TSPAN32	blue	0.343313	6.04613e-15	0.0679665	0.133792	-0.0699456	0.122812	0.153016	0.000694963	-0.0789423	0.0814839	0.158311	0.000447454	0.451885	6.24133e-26	0.366007	6.47076e-17	-0.0574482	0.205204	-0.095722	0.0345151	-0.0726587	0.108916	-0.0519907	0.251654	-0.044768	0.323684	-0.0616158	0.174166	-0.01809	0.690167	-0.0796428	0.0788074	-0.0915565	0.0432166	-0.283845	1.7019e-10	-0.0158588	0.726747
ENO3	blue	-0.235288	1.45345e-07	-0.0396615	0.381983	0.0989491	0.0288436	-0.0663183	0.143502	-0.14031	0.00189003	-0.0539066	0.234579	-0.300562	1.20171e-11	-0.0602454	0.183961	-0.0890512	0.0492908	-0.0923002	0.0415398	-0.0325622	0.472962	-0.0275551	0.543674	0.025255	0.577829	-0.0144581	0.750039	-0.00271808	0.952243	0.141247	0.00176033	0.265722	2.48455e-09	0.126048	0.00529555	0.0208179	0.646412
MIXL1	blue	0.146762	0.00114841	-0.00119192	0.979048	-0.0277326	0.541081	-0.038041	0.401748	0.124909	0.00572569	0.0407392	0.369174	0.11001	0.0150426	0.0144671	0.74989	-0.0760096	0.0934978	0.0251136	0.579961	0.35397	7.51318e-16	0.00626894	0.890136	0.0361849	0.425125	0.0706836	0.118902	0.0651464	0.150727	0.0602171	0.184167	0.0800942	0.0771209	0.090248	0.0463054	0.033696	0.457681
CDX1	blue	0.33349	3.85464e-14	-0.0633311	0.16246	0.0516719	0.254577	-0.0551869	0.223635	0.22401	5.74725e-07	-0.0201295	0.657346	0.384234	1.29037e-18	-0.0112406	0.804379	-0.0306618	0.499191	0.022255	0.62383	-0.0245351	0.588722	-0.0259796	0.566962	-0.00314694	0.944719	-0.00131398	0.976903	-0.0266634	0.556795	-0.0679113	0.134109	-0.0482285	0.287651	0.0797611	0.0783624	-0.052832	0.244052
TNFAIP8L2	blue	0.563986	2.52571e-42	-0.118886	0.00856664	-0.0356204	0.432388	0.00179276	0.96849	0.15791	0.000462822	0.0966679	0.0327619	0.741568	2.73042e-86	0.20728	3.88478e-06	-0.100308	0.0267069	-0.0489178	0.280809	-0.0892625	0.0487524	-0.0522432	0.249355	-0.055483	0.221157	-0.0731913	0.106339	-0.0682049	0.132431	-0.130751	0.00381079	-0.121285	0.00731145	-0.182563	4.97596e-05	-0.0596057	0.18867
MMP9	blue	0.317062	7.38882e-13	-0.126757	0.00504286	-0.0129763	0.774929	-0.085759	0.0583435	0.370137	2.72324e-17	-0.00947755	0.834578	0.363726	1.03802e-16	0.0307394	0.498105	-0.0801713	0.0768357	-0.00245231	0.956908	-0.0255337	0.573638	-0.0133255	0.769043	-0.0255833	0.572892	-0.0116352	0.797658	0.0297017	0.512729	-0.00286429	0.949677	-0.0195313	0.666909	0.0612251	0.176918	-0.0207567	0.647381
RAB25	blue	-0.117712	0.00924825	-0.315105	1.03807e-12	-0.0929614	0.0400953	-0.12624	0.0052259	-0.311101	2.06495e-12	-0.183849	4.39221e-05	-0.400622	3.07926e-20	-0.203339	5.9608e-06	0.184394	4.16485e-05	-0.0443958	0.327726	-0.0502425	0.267971	-0.0412097	0.363665	-0.0989085	0.0289097	-0.0547445	0.227375	-0.158399	0.000444115	-0.147798	0.00105814	-0.0963587	0.0333264	-0.0969253	0.0322982	-0.0423764	0.350229
COL9A2	blue	-0.112511	0.0128837	-0.0749455	0.0981924	-0.0509306	0.261464	0.0561483	0.215659	-0.0832641	0.066086	-0.0499828	0.270456	-0.174487	0.000106875	-0.0725587	0.109405	-0.0614133	0.175589	-0.058921	0.193807	-0.0223645	0.622123	-0.00623003	0.890814	-0.0163594	0.718481	0.0217333	0.631988	0.0616715	0.173777	-0.0498643	0.271594	0.0259021	0.568119	-0.0597676	0.187469	0.0814216	0.0723304
RPL3L	blue	-0.0879614	0.0521477	-0.0556208	0.22001	-0.00257604	0.954736	-0.039927	0.378802	-0.0867934	0.0553615	-0.0548589	0.226403	-0.133557	0.00311597	-0.119434	0.00826455	-0.0289134	0.523985	0.0577602	0.20275	0.0318817	0.482266	-0.0147429	0.745283	0.00741997	0.870129	0.0273129	0.547223	-0.0194511	0.668194	0.133455	0.00313908	0.0231301	0.610248	0.129138	0.00427104	0.00197383	0.96531
MC1R	blue	-0.0968151	0.032496	-0.00580983	0.898137	-0.0174307	0.700906	0.00973746	0.83011	-0.0331769	0.464643	-0.0575618	0.204308	-0.160961	0.000357062	-0.0929764	0.040063	-0.0209514	0.6443	-0.0241895	0.593985	-0.0250045	0.581609	0.0911204	0.0442262	-0.0402309	0.375182	-0.0167857	0.71147	-0.0559983	0.21689	0.156374	0.000526492	-0.00982941	0.82853	0.0878588	0.0524236	0.0156344	0.730463
CEACAM8	blue	0.00274001	0.951858	0.0321135	0.479085	-0.0304757	0.5018	0.0325775	0.472753	-0.0882444	0.0513929	0.0386097	0.394744	0.13117	0.00369899	0.156192	0.000534546	-0.0367	0.41856	-0.039683	0.381725	-0.0393864	0.385296	-0.0104161	0.818469	-0.0188004	0.678664	-0.0240616	0.595938	-0.0267583	0.555392	-0.0475059	0.294943	-0.0348005	0.443064	-0.209975	2.88465e-06	-0.0219379	0.628784
APOL4	blue	0.268864	1.58319e-09	-0.0810826	0.0735298	-0.06113	0.177593	-0.0304625	0.501986	0.107587	0.017431	0.0780781	0.084887	0.356467	4.55609e-16	0.0429459	0.343786	-0.0541214	0.232717	-0.00544507	0.904501	-0.0384876	0.396242	-0.0175474	0.699	0.115758	0.0104903	-0.00770168	0.865245	0.122593	0.00669902	0.00862084	0.849344	-0.0324781	0.474106	0.101692	0.0246707	-0.0268536	0.553984
ADAMDEC1	blue	0.350236	1.57422e-15	0.0620611	0.171069	0.144033	0.00142134	-0.06692	0.139897	0.0604121	0.182748	0.000633861	0.988857	0.391001	2.83022e-19	-0.0522206	0.24956	-0.0715803	0.114283	-0.0106337	0.814743	0.0259698	0.567108	0.00903761	0.842154	0.0553653	0.222139	0.00267382	0.95302	-0.0255495	0.5734	0.0908619	0.0448339	0.0109621	0.809132	0.163509	0.000286497	-0.0270542	0.551027
EFNB2	blue	0.135605	0.00268391	-0.0607084	0.180607	-0.00545797	0.904275	-0.0343007	0.449646	0.285221	1.37733e-10	0.0461793	0.308649	0.258572	6.78144e-09	0.201063	7.60479e-06	0.127949	0.00464208	0.197192	1.14339e-05	-0.0134832	0.766387	-0.0408791	0.36753	-0.0374777	0.40876	-0.0462429	0.307983	0.153218	0.000683555	-0.12999	0.0040221	0.0374434	0.40919	0.0100618	0.82454	-0.0741328	0.101903
KCNJ10	blue	0.211888	2.32981e-06	0.085634	0.0587126	0.00428968	0.924696	-0.0576992	0.203228	-0.015303	0.735961	0.0605936	0.181435	0.250265	2.09735e-08	-0.0314604	0.488076	-0.0661776	0.144356	-0.0228621	0.614394	-0.00724802	0.873113	0.0140517	0.756841	0.00956029	0.833155	0.0043928	0.922892	0.00519586	0.908852	0.101515	0.0249233	0.0367439	0.418002	0.174677	0.000105012	-0.0380778	0.401293
HAL	blue	-0.209895	2.91051e-06	-0.0679592	0.133834	-0.00988409	0.827591	-0.0900991	0.0466685	-0.123974	0.00610228	-0.0787071	0.082399	-0.211632	2.39778e-06	-0.157199	0.000491339	0.0643589	0.155736	0.0653969	0.14916	-0.000802276	0.985896	0.0032411	0.943068	-0.0148228	0.743952	-0.00198739	0.965072	-0.0647068	0.153508	0.058531	0.196779	-0.0250464	0.580975	0.169166	0.000173686	0.0343719	0.448705
MUC4	blue	-0.105203	0.0200983	-0.0893515	0.048527	-0.0705246	0.119736	0.0611759	0.177267	-0.133482	0.0031329	-0.0822603	0.0694306	-0.223447	6.14414e-07	-0.128387	0.00450199	0.0306039	0.500002	0.0778141	0.085949	0.0973121	0.0316119	-0.0508669	0.262062	-0.0454169	0.316712	-0.0337545	0.4569	-0.0842302	0.0629933	-0.0533161	0.239752	-0.0487645	0.282321	0.0405696	0.371171	0.0848273	0.0611419
EPB41L3	blue	0.117401	0.00943677	0.278495	3.83336e-10	0.062403	0.168718	-0.0397472	0.380954	0.196724	1.20058e-05	0.181728	5.3937e-05	0.354929	6.20282e-16	0.194873	1.45439e-05	-0.100333	0.0266677	-0.00704544	0.876631	0.149297	0.000939034	0.0164124	0.717609	0.030651	0.499343	0.0109012	0.810171	0.0630509	0.164331	0.267538	1.91628e-09	0.299226	1.4948e-11	0.0969942	0.0321749	-0.00487114	0.914526
CASP5	blue	0.403669	1.50188e-20	0.0413696	0.361806	0.104636	0.0207826	-0.0555661	0.220464	0.192484	1.85799e-05	0.0188885	0.677244	0.624224	4.53278e-54	0.073899	0.102991	-0.0684315	0.131147	0.0685176	0.130662	-0.0237561	0.600615	-0.00293707	0.9484	-0.00415	0.927142	-0.0163492	0.71865	-0.0326052	0.472378	-0.0396575	0.382032	-0.0197982	0.662635	0.160473	0.000372324	-0.051412	0.256977
AKR1C2	blue	-0.173683	0.000115117	-0.0979189	0.0305602	-0.0107836	0.812181	-0.076026	0.0934272	-0.178858	7.09586e-05	-0.0757855	0.0944713	-0.279925	3.09099e-10	-0.0999731	0.02722	0.0221368	0.625675	-0.0256562	0.571799	0.00515553	0.909556	-0.0201704	0.656695	-0.0123566	0.785409	0.00696371	0.878051	-0.0512486	0.258494	0.0975099	0.0312657	-0.00475296	0.916592	0.154173	0.000631956	-0.0224349	0.621027
KCNG2	blue	-0.119434	0.00826418	-0.0646021	0.154175	0.0270527	0.551049	-0.0661655	0.144429	-0.0619333	0.171953	-0.0641214	0.15727	-0.217251	1.26674e-06	-0.0546146	0.228481	-0.108887	0.0161109	-0.0548037	0.226872	-0.0327231	0.470776	-0.057125	0.207769	-0.0496867	0.273307	-0.0532177	0.240622	-0.04143	0.361104	-0.0298938	0.510005	-0.0358922	0.428882	-0.0368983	0.416047	0.0475088	0.294914
CDH15	blue	-0.158769	0.00043043	-0.085953	0.0577742	0.00237827	0.958208	-0.0374166	0.409525	-0.152377	0.000732234	-0.0795064	0.0793228	-0.258247	7.09257e-09	-0.0480856	0.289083	-0.0841986	0.0630924	-0.104757	0.0206346	-0.0562275	0.215011	-0.0653791	0.149271	-0.0308228	0.49694	-0.0467201	0.303012	-0.0643113	0.156042	-0.0313494	0.489612	-0.0168274	0.710785	-0.0730098	0.107212	0.00553131	0.902995
SLC26A1	blue	-0.25257	1.53938e-08	0.14049	0.00186442	0.0777556	0.0861857	0.0341508	0.451629	-0.296233	2.42773e-11	-0.0654058	0.149105	-0.280091	3.0142e-10	-0.0810373	0.0736914	-0.0282207	0.533981	-0.102365	0.0237303	-0.0577804	0.202592	0.0416381	0.358695	-0.0329591	0.467581	-0.0267503	0.55551	-0.0563043	0.214385	0.120331	0.0077894	0.00201433	0.964598	-0.0766395	0.0908046	0.0388639	0.391636
AC136428.1	blue	0.236797	1.20279e-07	-0.0162912	0.719606	-0.0121372	0.78913	-0.0148155	0.744074	0.232248	2.12025e-07	0.0118141	0.794615	0.220978	8.21775e-07	0.0692999	0.126315	-0.0552919	0.222754	-0.00109161	0.980811	-0.0343587	0.448879	-0.0333847	0.461849	-0.0241571	0.594479	-0.0234692	0.605021	-0.0204355	0.652477	-0.02231	0.622973	-0.0398051	0.380261	-0.0783222	0.0839144	0.204756	5.11541e-06
ATP1B1	blue	-0.201373	7.35751e-06	-0.148399	0.00100878	-0.0488334	0.28164	-0.0728961	0.107761	-0.214664	1.70289e-06	-0.106153	0.0189956	-0.389808	3.70788e-19	-0.0551053	0.224322	0.130485	0.00388352	-0.0946135	0.0366708	-0.0398593	0.379612	-0.0814917	0.0720843	-0.0880945	0.0517914	-0.0729461	0.107519	-0.0950213	0.0358648	-0.0464779	0.305528	-0.0935744	0.0387945	-0.212486	2.17842e-06	-0.0272062	0.54879
C20orf204	blue	-0.0505955	0.26462	0.0104789	0.817393	-9.0056e-05	0.998417	-0.0319471	0.481368	-0.132877	0.00327299	-0.051709	0.254236	-0.159216	0.000414413	-0.11337	0.0122078	-0.00757817	0.867386	-0.0553122	0.222584	-0.0230418	0.611614	-0.0329519	0.467678	0.0169418	0.708908	0.00799698	0.86013	-0.0186673	0.680814	0.0442121	0.329734	0.00437795	0.923152	0.0382386	0.399306	-0.0272591	0.548013
TRIM17	blue	-0.124869	0.00574134	0.0504977	0.265545	0.0322487	0.477236	-0.0239431	0.59775	-0.036276	0.423959	-0.0146943	0.746096	-0.179586	6.62179e-05	-0.0708621	0.117971	-0.0363316	0.423248	-0.00260214	0.954278	0.00505195	0.911366	0.0284398	0.530808	-0.00389674	0.931577	0.100134	0.0269714	-0.0214002	0.637221	-0.0495945	0.2742	0.0284008	0.531372	-0.0419906	0.354637	0.00276617	0.951399
CLEC6A	blue	0.239756	8.26724e-08	0.126103	0.00527549	0.124005	0.0060893	-0.0528264	0.244102	0.0960867	0.0338299	-0.00276226	0.951468	0.418223	4.39147e-22	-0.0337546	0.456899	-0.024876	0.583551	-0.0093262	0.837183	-0.0267923	0.55489	-0.00401366	0.929529	0.0269744	0.552203	-0.00806411	0.858968	-0.0230996	0.610719	-0.0208273	0.646263	-0.0112688	0.803898	0.0945048	0.0368883	-0.0249003	0.583185
GRB7	blue	-0.0720937	0.111702	-0.127759	0.00470377	-0.0666964	0.141229	-0.0610338	0.178277	-0.145436	0.0012744	-0.0770194	0.0892109	-0.187965	2.92883e-05	-0.137231	0.00238032	0.10566	0.0195614	-0.00374735	0.934194	0.0514832	0.256318	-0.00733566	0.871592	-0.0119655	0.792044	-0.00852766	0.850953	-0.0293569	0.517638	-0.0332056	0.464256	-0.00504621	0.911466	0.0526347	0.24582	0.0489797	0.2802
SOWAHD	blue	0.472019	1.90784e-28	-0.171633	0.000138918	-0.0980047	0.030414	0.00754824	0.867904	0.0703952	0.120418	0.0568105	0.210287	0.628573	5.09518e-55	0.256027	9.62515e-09	-0.0522685	0.249126	-0.0994788	0.0279937	-0.0913409	0.0437133	-0.0246836	0.586467	0.00373999	0.934323	-0.0460283	0.310235	-0.0632949	0.162701	-0.0822032	0.0696249	-0.0673855	0.137156	-0.172713	0.000125856	-0.043049	0.342629
SLC28A2	blue	-0.151793	0.00076783	-0.0368135	0.417121	-0.0271158	0.550119	-0.0531637	0.2411	-0.102953	0.022935	-0.042049	0.353967	-0.184936	3.94954e-05	-0.069096	0.127437	0.141938	0.00167	0.00193259	0.966034	-0.00336975	0.940812	0.0252862	0.577359	-0.00808494	0.858607	0.00541244	0.90507	-0.0389652	0.390402	0.0112411	0.80437	0.00468982	0.917696	0.0563137	0.214308	0.0106393	0.814649
AFP	blue	0.0211384	0.641347	-0.0155488	0.731881	0.00948025	0.834532	-0.0266712	0.55668	-0.0126675	0.780146	-0.011182	0.805378	0.126643	0.00508275	-0.0438174	0.334074	0.0291081	0.521193	-0.00506697	0.911103	-0.000296368	0.99479	-0.00744677	0.869664	0.0920242	0.0421555	0.210913	2.59832e-06	-0.00443381	0.922174	0.00614902	0.892225	-0.00391664	0.931228	0.0617873	0.172968	-0.0127024	0.779556
LIME1	blue	0.0323027	0.476498	-0.0952259	0.0354661	-0.0745107	0.100164	0.0884128	0.0509479	-0.18939	2.54025e-05	-0.0794487	0.079542	-0.0636697	0.160221	-0.0905343	0.0456143	-0.0263009	0.562174	-0.042362	0.350393	-0.0118099	0.794688	-0.0548937	0.226108	0.027902	0.538612	-0.0113512	0.802493	0.00172672	0.969651	0.0904296	0.0458659	0.0277247	0.541195	0.0421872	0.352386	0.0171991	0.704692
IGLL1	blue	0.23318	1.88938e-07	-0.0556862	0.219467	-0.03357	0.459366	0.000953795	0.983233	0.0913219	0.0437572	-0.00885966	0.845222	0.179692	6.55514e-05	-0.000993612	0.982533	-0.0180838	0.690267	0.0598767	0.186664	-0.0214218	0.636881	-0.0291576	0.520486	-0.0109312	0.809659	-0.0120095	0.791296	-0.027213	0.548689	-0.0093446	0.836866	-0.0345675	0.446126	-0.0381448	0.400465	0.00799214	0.860214
C16orf54	blue	0.316307	8.42672e-13	-0.00320972	0.943618	-0.0173054	0.702953	0.144167	0.0014066	0.0711833	0.11631	0.114867	0.0111047	0.402974	1.7704e-20	0.209464	3.05308e-06	0.0925058	0.041086	-0.0091762	0.839766	-0.0340523	0.452936	-0.0442086	0.329773	-0.0481088	0.28885	-0.0577336	0.202958	-0.040297	0.374396	-0.0942859	0.0373294	-0.0978446	0.0306874	-0.285379	1.34411e-10	-0.0296147	0.513965
BHMT2	blue	-0.140288	0.00189329	-0.04445	0.327136	-0.00866785	0.848532	-0.0934533	0.0390486	-0.139297	0.00204013	-0.0636417	0.160406	-0.203511	5.85161e-06	-0.109401	0.0156139	-0.0620409	0.171208	-0.0510027	0.260788	-0.0155459	0.73193	0.0538392	0.235165	-0.0197368	0.663617	-0.00996665	0.826174	-0.0387236	0.393349	0.192595	1.8371e-05	-0.0128336	0.777339	0.130025	0.00401227	0.0956198	0.0347093
NOXA1	blue	-0.148527	0.000998585	-0.160721	0.000364494	-0.0486775	0.283181	-0.0104511	0.81787	-0.334185	3.38878e-14	-0.133671	0.00309031	-0.340984	9.43588e-15	-0.125942	0.00533421	0.0797702	0.0783283	-0.11798	0.00908878	-0.061351	0.176028	-0.0230588	0.611351	-0.0684045	0.131299	-0.0756854	0.0949086	-0.122698	0.00665176	0.0268251	0.554405	-0.0855679	0.0589087	-0.101404	0.0250826	0.0352421	0.437295
CLEC9A	blue	0.294919	2.99785e-11	0.181273	5.63501e-05	-0.0791737	0.0805916	0.103278	0.0225047	-0.0615073	0.174927	0.0868605	0.0551724	0.432125	1.27594e-23	0.367781	4.46775e-17	0.0446298	0.325181	-0.0257432	0.570495	-0.0601875	0.184383	0.018239	0.687748	-0.0614854	0.175081	0.0370227	0.414476	-0.0664711	0.14258	-0.131956	0.00349683	-0.0920842	0.0420211	-0.331949	5.12409e-14	-0.064212	0.156684
ELL3	blue	-0.115489	0.0106723	-0.164149	0.000270945	-0.0264418	0.56008	0.0817457	0.0711982	-0.258748	6.61828e-09	-0.110755	0.0143687	-0.246554	3.42893e-08	-0.128947	0.0043288	0.132754	0.00330201	-0.0757263	0.09473	-0.0328258	0.469385	-0.0538588	0.234995	-0.0153938	0.734453	-0.068773	0.12923	-0.107699	0.0173137	0.0382276	0.399442	-0.0844256	0.0623823	-0.0593991	0.190209	-0.00474771	0.916684
KCNN3	blue	0.166399	0.000222307	0.274717	6.73101e-10	-0.0192789	0.670959	0.246201	3.59169e-08	0.242901	5.52029e-08	0.117902	0.00913512	0.244111	4.7187e-08	0.252615	1.53001e-08	-0.113552	0.0120685	0.0183355	0.686184	-0.048273	0.287206	-0.0461573	0.30888	0.0236965	0.601528	-0.0124962	0.783045	0.0167499	0.712057	0.0293188	0.518182	-0.0554074	0.221787	-0.235776	1.36733e-07	-0.0156051	0.730949
GCAT	blue	-0.109707	0.0153243	-0.233359	1.84804e-07	-0.0762551	0.0924408	-0.0276315	0.542556	-0.168485	0.000184632	-0.102906	0.0229974	-0.258406	6.93907e-09	-0.133847	0.00305117	-0.00737742	0.870867	-0.0187774	0.679035	-0.00453949	0.920325	-0.0317109	0.484616	0.0239834	0.597133	0.0709127	0.117708	0.00250772	0.955935	-0.0758868	0.0940303	0.0681628	0.132671	0.0393431	0.385819	-0.0422506	0.351662
DNAJC5B	blue	0.420734	2.34612e-22	-0.0106479	0.814502	-0.0259889	0.566823	-0.0196998	0.664209	0.0241512	0.59457	0.0706852	0.118894	0.658865	4.50415e-62	0.333936	3.54858e-14	0.167654	0.000198852	-0.0343121	0.449494	-0.0518218	0.253199	-0.0226964	0.616963	0.041605	0.359078	-0.0365534	0.420422	-0.0496577	0.273588	-0.0453462	0.317468	-0.0560184	0.216725	-0.151162	0.000808194	-0.0568365	0.210078
HID1	blue	-0.270862	1.18505e-09	-0.255602	1.0201e-08	-0.119445	0.00825849	-0.0600069	0.185706	-0.281321	2.50205e-10	-0.13911	0.00206902	-0.466839	8.78126e-28	-0.141593	0.0017146	0.206995	4.0078e-06	-0.14549	0.00126902	-0.0435935	0.336553	-0.0552514	0.223093	-0.0292475	0.5192	-0.0674873	0.136561	-0.0916541	0.0429933	0.118723	0.00865852	-0.0181219	0.689648	-0.0517076	0.254248	0.0244187	0.590492
COL25A1	blue	-0.247941	2.85607e-08	-0.00829927	0.8549	0.0592471	0.191347	-0.0521177	0.250495	-0.134021	0.00301282	-0.0481455	0.288483	-0.315788	9.22211e-13	0.00298747	0.947516	-0.0603627	0.183107	-0.0889849	0.0494608	-0.0337406	0.457086	-0.0408039	0.368413	0.0674258	0.13692	-0.0101579	0.822892	0.228319	3.42716e-07	0.0661217	0.144696	0.0224238	0.6212	-0.00226901	0.960126	-0.0148014	0.744309
HAPLN3	blue	0.453598	3.87114e-26	-0.109706	0.015326	-0.0351516	0.438474	-0.0572902	0.206455	0.393787	1.49979e-19	0.0379213	0.403232	0.459093	8.20642e-27	0.0129112	0.776029	-0.0308739	0.496226	0.0452158	0.318863	0.0124098	0.784508	0.0121853	0.788313	0.00677468	0.881336	-0.0101972	0.822219	0.0347066	0.444296	-0.0571802	0.207329	-0.00585239	0.897395	0.189963	2.398e-05	-0.030845	0.496629
SYCE3	blue	-0.0888156	0.0498969	-0.145399	0.00127801	-0.0501052	0.269283	0.0023175	0.959275	-0.194729	1.47613e-05	-0.0710264	0.11712	-0.213331	1.98045e-06	-0.104552	0.0208857	0.0305715	0.500457	-0.0390022	0.389952	-0.0188115	0.678485	-0.0426897	0.346676	-0.0336104	0.458825	0.0327229	0.470779	-0.0852643	0.0598158	-0.0450678	0.320451	-0.044048	0.331535	-0.0635766	0.160835	-0.019043	0.674754
MAMDC4	blue	-0.1519	0.000761197	0.0506058	0.264522	-0.00531002	0.906858	0.028105	0.53566	-0.246417	3.49095e-08	-0.0525796	0.246315	-0.221997	7.29163e-07	-0.0478517	0.291438	-0.0223178	0.622852	-0.101222	0.0253467	-0.0490772	0.279243	-0.0434055	0.338643	-0.0278609	0.53921	-0.0381017	0.400998	-0.068576	0.130333	0.107843	0.0171643	-0.0385162	0.395891	-0.0755251	0.0956125	0.0512167	0.258791
BHLHE41	blue	0.262378	3.98875e-09	0.0648019	0.152903	-0.0644955	0.154858	0.0586706	0.195711	0.304872	5.89876e-12	0.137103	0.00240314	0.459999	6.33846e-27	0.187367	3.10789e-05	0.235956	1.33685e-07	0.111223	0.013959	0.142405	0.00161128	-0.0191369	0.673242	-0.0487009	0.28295	-0.00480653	0.915655	-0.00403296	0.929191	-0.0706941	0.118847	-0.0625331	0.16783	-0.104748	0.0206464	-0.0264868	0.559412
SRGN	blue	0.20887	3.26058e-06	0.000663911	0.988328	0.0701369	0.121789	-0.0737817	0.103539	0.156295	0.000529958	0.0588016	0.194714	0.412165	1.95134e-21	0.0785961	0.0828336	-0.0350271	0.440099	0.02614	0.564569	-0.0319821	0.480887	0.0973942	0.0314678	-0.0284226	0.531057	-0.0265251	0.558845	-0.0382638	0.398995	-0.0789509	0.0814507	-0.0281011	0.535716	0.183852	4.39088e-05	-0.046432	0.306007
KLHDC7B	blue	0.179817	6.47713e-05	-0.0465052	0.305243	-0.0010003	0.982416	-0.0339684	0.454051	0.0220203	0.627495	-0.00953566	0.833579	0.183593	4.50294e-05	-0.0356897	0.431493	-0.00910677	0.840962	0.0702854	0.120999	0.030178	0.50599	0.0295109	0.515442	-0.0216673	0.633024	-0.0148112	0.744145	-0.0273619	0.546505	-0.0354623	0.434435	-0.0136114	0.764231	0.104145	0.0213919	0.00267271	0.953039
ISYNA1	blue	-0.204756	5.11487e-06	-0.199529	8.94678e-06	-0.0687352	0.129441	-0.0302546	0.504909	-0.0828093	0.0675846	-0.0285401	0.52936	-0.326968	1.27203e-13	-0.110802	0.0143267	-0.120608	0.00764782	-0.03852	0.395843	0.0181583	0.689057	-0.0199173	0.660732	0.0590716	0.192669	0.0651085	0.150965	0.121917	0.00700946	-0.0120388	0.790799	0.192076	1.93677e-05	0.108961	0.0160392	0.0810894	0.0735058
STPG3	blue	-0.167661	0.00019874	-0.00521419	0.908532	-0.0144967	0.749395	-0.012972	0.775002	-0.158835	0.000428036	-0.0633848	0.162104	-0.23013	2.74963e-07	-0.0875778	0.0531855	-0.0936079	0.0387244	-0.0878295	0.0525026	-0.0454759	0.316084	-0.0476562	0.293416	-0.00906836	0.841624	-0.0258964	0.568204	-0.0445985	0.325521	0.111178	0.0139976	-0.0104214	0.818378	-0.0355909	0.432769	0.0915093	0.0433249
MFSD3	blue	-0.162123	0.000323097	-0.225599	4.75558e-07	-0.0181749	0.688788	-0.0818026	0.0710009	-0.224742	5.26772e-07	-0.121994	0.00697359	-0.301307	1.06358e-11	-0.175076	0.0001012	0.0116123	0.798048	-0.0351523	0.438466	-0.0109779	0.808861	-0.0629565	0.164965	0.0258204	0.56934	-0.012764	0.778515	-0.0618949	0.172219	0.108508	0.0164873	-0.0666235	0.141665	0.102705	0.0232671	-0.012598	0.781322
PAQR6	blue	-0.114779	0.0111668	-0.00392113	0.931149	-0.0186167	0.681633	-0.0351431	0.438585	-0.200179	8.35268e-06	-0.0784953	0.0832302	-0.19174	2.00398e-05	-0.154554	0.000612396	-0.0120732	0.790216	-0.0475125	0.294875	-0.0130101	0.77436	-0.0189988	0.675465	0.0494143	0.275949	0.00128672	0.977382	-0.0356942	0.431435	0.158138	0.000454026	0.00756817	0.867559	0.120876	0.00751339	0.0151543	0.738432
SIRPG	blue	0.630338	2.07784e-55	-0.0839558	0.0638593	-0.0843247	0.0626971	-0.0689371	0.128317	0.0657161	0.147181	0.000122855	0.99784	0.560926	8.63173e-42	0.0429564	0.343669	-0.0948488	0.0362039	-0.0297627	0.511864	-0.0486774	0.283183	-0.0440141	0.331907	-0.0455246	0.315566	-0.0363614	0.422869	-0.0762871	0.0923035	-0.0627473	0.166376	-0.0783335	0.0838696	0.0134338	0.767219	-0.03177	0.483803
APOC4-APOC2	blue	0.280364	2.89223e-10	-0.0640895	0.157478	-0.0483954	0.285984	-0.0433345	0.339434	0.0318944	0.482092	0.0299137	0.509723	0.488736	1.1535e-30	0.17784	7.81287e-05	0.0626149	0.167274	0.0541152	0.23277	-0.0190384	0.674827	-0.0162938	0.719564	-0.0296261	0.513803	-0.0363253	0.423329	-0.0470654	0.299449	-0.0681207	0.132911	-0.0656406	0.147647	-0.122325	0.00682046	-0.0424439	0.349462
GTSF1L	blue	0.233694	1.77281e-07	0.0757075	0.0948121	-0.0456817	0.313897	-0.0168861	0.709821	0.0531008	0.241658	-0.017145	0.705577	0.241719	6.42956e-08	0.00370269	0.934976	-0.0593797	0.190354	-0.0545295	0.229208	-0.0333926	0.461743	-0.054048	0.233352	-0.00563218	0.901235	-0.0345658	0.446148	-0.012463	0.783608	0.270816	1.19293e-09	-0.0520109	0.251469	-0.0114933	0.800072	-0.0182279	0.687928
SAPCD1	blue	-0.117796	0.00919814	-0.00137753	0.975786	-0.0545013	0.229449	0.0374992	0.408492	-0.255071	1.09668e-08	-0.0895822	0.047947	-0.199552	8.92582e-06	-0.118809	0.00860993	-0.0720664	0.111839	-0.0768296	0.0900041	-0.0430955	0.342107	-0.0132005	0.771148	0.0025776	0.954708	0.0091036	0.841016	-0.0468212	0.301965	0.0997187	0.0276157	0.0166399	0.713865	0.0614392	0.175406	0.052099	0.250666
SPIRE2	blue	-0.239426	8.62279e-08	-0.117996	0.00907947	-0.0533038	0.239861	-0.0120426	0.790734	-0.351135	1.31862e-15	-0.12049	0.00770793	-0.404437	1.25184e-20	-0.114025	0.0117133	0.187865	2.95793e-05	-0.0801225	0.0770159	-0.0268394	0.554193	0.00994401	0.826562	-0.0560565	0.216412	-0.0552095	0.223445	-0.106255	0.018881	0.187605	3.03539e-05	-0.0528933	0.243504	-0.0515991	0.255247	-0.0169311	0.709084
FCGR1B	blue	0.457581	1.26105e-26	0.0174578	0.700462	0.0700827	0.122078	-0.0685992	0.130203	0.217578	1.21991e-06	0.11852	0.00877431	0.710199	4.23548e-76	0.111099	0.0140659	-0.0958377	0.0342964	-0.0270253	0.551451	-0.07707	0.0889999	-0.00832649	0.854429	-0.0224897	0.620175	-0.0456961	0.313744	-0.0492798	0.27726	-0.0980358	0.0303612	-0.0612919	0.176445	0.0182504	0.687563	-0.0413434	0.362109
GGN	blue	-0.0153644	0.734942	-0.113185	0.0123505	-0.0679526	0.133872	-0.0296146	0.513967	0.136277	0.00255447	-0.0535136	0.238013	-0.111276	0.0139132	-0.0562091	0.215162	0.0274832	0.544726	0.0688455	0.128826	-0.00892426	0.844108	0.0301365	0.506575	-0.022262	0.623722	0.0209776	0.643885	-0.00194652	0.965789	0.018962	0.676059	-0.0265321	0.558741	-0.0474441	0.295572	-0.00119093	0.979065
CD69	blue	0.370183	2.69682e-17	0.14434	0.0013879	0.0353507	0.435883	0.0276823	0.541815	0.0623148	0.169322	0.0579565	0.201217	0.511155	7.72671e-34	0.270631	1.22561e-09	0.172865	0.000124114	-0.0481538	0.288399	-0.0583184	0.198413	-0.0271959	0.548941	-0.0257625	0.570206	-0.00927099	0.838133	-0.0458728	0.311875	-0.108436	0.0165585	-0.0847919	0.0612506	-0.161789	0.000332524	-0.0485313	0.284632
C1QC	blue	0.513543	3.43534e-34	-0.149853	0.000898132	-0.0553534	0.222238	-0.072098	0.111681	0.210686	2.66516e-06	0.107387	0.017642	0.788379	1.31639e-104	0.195902	1.30757e-05	-0.0924329	0.0412465	-0.0429414	0.343838	-0.0711158	0.116658	-0.0208012	0.646676	-0.0130761	0.773246	-0.0446768	0.324671	-0.0395117	0.383785	-0.0673927	0.137114	-0.0717219	0.113567	0.0340269	0.453274	-0.0268747	0.553673
C10orf55	blue	0.192429	1.86851e-05	0.0343762	0.448648	0.0675759	0.136047	-0.0445744	0.325783	0.33868	1.46033e-14	-0.0359283	0.428417	0.298735	1.61919e-11	-0.0847747	0.0613034	-0.0742435	0.101391	0.196629	1.21248e-05	-0.00824225	0.855886	-0.0338031	0.456251	-0.0504094	0.266383	0.0370609	0.413996	-0.00996278	0.82624	-0.117429	0.00941972	-0.0468686	0.301476	0.18245	5.03055e-05	-0.0296829	0.512997
FCRL4	blue	0.352615	9.83678e-16	0.0462037	0.308393	0.00816237	0.857268	0.0481496	0.288441	0.0222423	0.624029	0.0417114	0.357849	0.330203	7.06125e-14	0.207442	3.81595e-06	-0.0868038	0.0553321	-0.0286753	0.527411	-0.0288456	0.52496	-0.0384535	0.39666	-0.0308474	0.496596	-0.0338668	0.455404	-0.0320808	0.479534	-0.0133654	0.76837	-0.0542669	0.231461	-0.098564	0.0294753	-0.0383221	0.398277
CD163	blue	0.305477	5.33222e-12	0.0761503	0.0928908	0.0643298	0.155923	-0.0432695	0.34016	0.218833	1.0551e-06	0.225816	4.63363e-07	0.701095	2.15455e-73	0.300064	1.30392e-11	-0.0963213	0.0333953	0.00103309	0.981839	-0.0588547	0.19431	0.000514621	0.990953	-0.0416466	0.358596	-0.0405654	0.371221	-0.0171242	0.705918	-0.0802115	0.0766875	-0.0498168	0.272052	-0.0121505	0.788903	-0.00597062	0.895334
CNGB3	blue	-0.250382	2.06478e-08	0.184596	4.08338e-05	0.015237	0.737057	-0.0428309	0.345082	-0.115198	0.0108727	0.169959	0.000161699	-0.224514	5.41257e-07	-0.105024	0.0203128	0.0228868	0.614012	0.0446013	0.325491	0.0666684	0.141396	0.0360293	0.42712	0.0804291	0.0758884	0.075397	0.0961781	-0.0164712	0.716641	0.155449	0.000568639	0.050112	0.269217	0.149468	0.000926269	0.0181531	0.689142
PKD2L1	blue	0.189328	2.55608e-05	-0.0319571	0.48123	-0.0472715	0.297334	0.03419	0.45111	-0.0292449	0.519237	0.0663788	0.143136	0.396084	8.84661e-20	0.375173	9.31804e-18	0.0178239	0.694494	-0.0460631	0.30987	-0.042618	0.347487	0.00535269	0.906113	0.040029	0.377584	-0.0261828	0.563931	-0.00243127	0.957277	0.159301	0.000411435	-0.0298672	0.510382	-0.0868966	0.0550709	-0.0421264	0.353081
TMPRSS13	blue	-0.158075	0.000456441	-0.189419	2.53264e-05	-0.0568619	0.209874	-0.124355	0.00594608	-0.156362	0.000526992	-0.124729	0.00579649	-0.310293	2.3694e-12	-0.146347	0.00118659	-0.0733669	0.1055	-0.0183342	0.686204	0.100173	0.0269126	0.0492178	0.277865	-0.0617639	0.173131	-0.00584058	0.897601	-0.117585	0.00932511	-0.102606	0.0234014	-0.0292974	0.518487	0.0144108	0.75083	0.0157901	0.727883
DMGDH	blue	-0.0858721	0.0580109	0.0490358	0.279649	0.0172763	0.70343	-0.0439242	0.332896	-0.0806003	0.0752649	-0.0459449	0.311113	-0.131143	0.00370614	-0.0875629	0.0532261	-0.0845876	0.0618797	-0.0558822	0.217846	-0.0268535	0.553986	0.0138781	0.759753	-0.0433353	0.339425	-0.0324658	0.474274	-0.0475947	0.29404	0.0430195	0.342959	-0.0271805	0.549167	0.0327191	0.47083	0.0441451	0.330469
UCN	blue	-0.0692086	0.126816	-0.083974	0.0638015	-0.039661	0.381989	-0.0406436	0.370298	-0.164072	0.000272786	-0.076514	0.0913362	-0.17878	7.1485e-05	-0.106831	0.0182415	-0.0683642	0.131527	-0.0498774	0.271469	-0.048988	0.280119	0.0266652	0.55677	-0.0321952	0.477967	-0.0409429	0.366782	-0.0711815	0.11632	-0.00468676	0.917749	0.00356509	0.937388	0.0406953	0.36969	0.0203599	0.653678
TNFRSF17	blue	0.329204	8.47486e-14	-0.0112937	0.803474	0.0301212	0.506791	-0.00352129	0.938155	0.101714	0.0246403	0.0031545	0.944586	0.344486	4.82483e-15	0.0621377	0.17054	-0.0468572	0.301593	-0.0263966	0.560751	-0.0485185	0.284759	-0.049102	0.279	-0.0169873	0.708161	-0.0338847	0.455165	-0.0442607	0.329203	-0.00634647	0.888786	-0.0606752	0.180846	-0.0727027	0.108701	-0.0254475	0.574933
ARMC12	blue	-0.0983015	0.0299129	-0.0586004	0.196248	-0.031996	0.480696	-0.00773817	0.864612	-0.192394	1.87501e-05	-0.0422761	0.351372	-0.192085	1.93506e-05	-0.0748895	0.0984447	-0.0809386	0.0740445	-0.061573	0.174466	-0.0270923	0.550466	-0.00211307	0.962864	-0.0221247	0.625864	-0.00367918	0.935388	0.01074	0.812926	0.00391704	0.931221	-0.0270795	0.550654	0.055466	0.221298	0.0131023	0.772803
FCRL2	blue	0.165792	0.000234562	0.13832	0.00219507	-0.0089788	0.843167	0.0410252	0.365819	0.0157068	0.729263	0.0135116	0.765909	0.174008	0.000111725	0.0326481	0.471794	-0.0709476	0.117527	-0.0434887	0.337717	-0.0398949	0.379186	-0.0426671	0.346931	0.0142167	0.754078	0.0219242	0.628998	-0.03897	0.390344	-0.0142811	0.753	-0.0518642	0.252811	-0.111363	0.0138377	-0.0134246	0.767373
OAT	blue	-0.170195	0.0001583	-0.0799639	0.0776046	0.083203	0.0662859	-0.0698374	0.123394	-0.0927847	0.0404771	-0.0578095	0.202364	-0.2368	1.2023e-07	-0.135784	0.00264875	-0.0276719	0.541967	-0.0764789	0.0914854	0.0242001	0.593823	-0.0611373	0.177541	-0.0257485	0.570417	-0.0271371	0.549806	-0.0754379	0.0959971	0.0626587	0.166976	-0.0401812	0.375772	0.0691325	0.127235	-0.00651965	0.885772
APOBEC3A	blue	0.258594	6.76106e-09	-0.0586744	0.195682	-0.0216	0.63408	-0.00744549	0.869687	0.00118342	0.979197	0.00789246	0.86194	0.305858	5.00378e-12	0.0916057	0.043104	-0.0142833	0.752962	0.106934	0.0181296	0.0711592	0.116434	0.0333152	0.462782	-0.0473742	0.296285	-0.0320855	0.47947	-0.0463628	0.306729	-0.0750073	0.0979146	-0.041122	0.364688	0.0525741	0.246365	-0.0430539	0.342573
MST1	blue	-0.185543	3.72141e-05	-0.0117027	0.796509	-0.00889396	0.844631	0.0348571	0.442322	-0.141184	0.0017688	0.0940158	0.03788	-0.196184	1.26995e-05	-0.0458195	0.312438	-0.0461617	0.308833	-0.0581837	0.199453	-0.0259176	0.567887	-0.0437824	0.334461	0.00884843	0.845416	-0.0120043	0.791384	-0.0145411	0.748652	0.0339648	0.454099	0.0113591	0.802358	-0.0111345	0.806189	0.0376738	0.406311
C1orf226	blue	-0.04315	0.341496	-0.137226	0.0023813	-0.117005	0.00968201	-0.112344	0.0130182	-0.198749	9.71346e-06	-0.0794898	0.079386	-0.25913	6.27706e-09	-0.120217	0.00784832	-0.00178058	0.968704	-0.0137014	0.76272	-0.0295235	0.515264	0.0874688	0.0534836	-0.085083	0.0603632	-0.0654983	0.148529	-0.0989703	0.0288091	-0.0966374	0.0328173	-0.0285786	0.528805	-0.126167	0.00525229	-0.0253607	0.576237
ITIH6	blue	-0.166836	0.000213861	-0.0129464	0.775435	-0.010585	0.815577	0.0132779	0.769843	-0.107576	0.0174425	-0.0173184	0.70274	-0.164266	0.000268199	-0.0276688	0.542012	0.0361784	0.425208	-0.0291737	0.520256	0.0173032	0.70299	0.00902961	0.842292	0.0145913	0.747815	0.00326067	0.942724	-0.0189219	0.676704	0.0248428	0.584055	0.0164279	0.717354	0.0181159	0.689746	0.0368324	0.416881
CBR3	blue	-0.0907588	0.0450782	-0.0883294	0.0511678	-0.030168	0.506131	-0.0454762	0.31608	-0.136713	0.00247357	-0.0503447	0.266997	-0.20595	4.49244e-06	-0.00317927	0.944152	-0.0311241	0.492741	-0.0287366	0.526528	0.00221468	0.96108	-0.00804218	0.859347	-0.0325598	0.472995	-0.0149102	0.742496	-0.0500187	0.270112	-0.0182045	0.688308	-0.0253622	0.576214	-0.0354684	0.434356	-0.0203758	0.653426
SLC14A2	blue	-0.147569	0.00107755	0.00857491	0.850137	0.124326	0.00595786	-0.0459071	0.311513	-0.150723	0.000837378	-0.050123	0.269113	-0.2481	2.79651e-08	-0.0468098	0.302083	-0.0145754	0.748079	-0.0817378	0.0712258	-0.0321182	0.479021	-0.0434548	0.338093	-0.00436963	0.923297	-0.0210781	0.642299	-0.0372962	0.411035	0.0799437	0.0776798	-0.0177453	0.695773	-0.0431721	0.341249	-0.0176468	0.697379
QPRT	blue	-0.157563	0.000476549	-0.121608	0.00715596	-0.00823774	0.855964	-0.0824351	0.0688385	-0.104818	0.0205607	-0.0610166	0.1784	-0.19136	2.08265e-05	-0.156477	0.000521957	-0.0513878	0.257201	-0.0748062	0.0988205	-0.038912	0.39105	0.0651745	0.150551	-0.00876029	0.846937	-0.00911728	0.840781	0.0173597	0.702065	0.0267303	0.555806	0.0978183	0.0307326	0.152318	0.000735711	0.0294217	0.516713
KCNU1	blue	-0.114685	0.0112334	-0.0485213	0.284731	-0.00943348	0.835336	-0.0693104	0.126257	-0.110955	0.0141922	-0.0569314	0.209316	-0.21444	1.74676e-06	-0.13388	0.00304397	-0.0199439	0.660307	-0.0725789	0.109306	-0.0218361	0.630377	-0.0295602	0.514741	0.0011244	0.980234	-0.00339963	0.940288	-0.0408638	0.367709	0.0375174	0.408264	-0.00716294	0.87459	0.0965124	0.0330447	0.000913256	0.983945
RGS18	blue	0.336191	2.33131e-14	0.316833	7.69038e-13	0.166904	0.00021257	0.0188346	0.678112	0.162023	0.000325888	0.117684	0.00926537	0.661886	8.03465e-63	0.210719	2.65534e-06	-0.0855384	0.0589963	-0.00918129	0.839678	-0.056715	0.211055	-0.0371559	0.412798	-0.0383876	0.39747	-0.0593458	0.190608	-0.0482508	0.287428	-0.107479	0.0175451	-0.0765811	0.0910519	-0.139478	0.00201254	-0.0608044	0.179917
FSTL4	blue	-0.136406	0.00253023	-0.0815804	0.0717736	-0.0304158	0.502642	-0.0501288	0.269057	-0.0707915	0.118339	-0.0500438	0.269871	-0.231781	2.24578e-07	0.00284367	0.950039	-0.00783505	0.862934	-0.0638449	0.159072	-0.0178147	0.694643	-0.0384679	0.396483	-0.0248104	0.584545	-0.0242902	0.592448	-0.0316145	0.485947	0.0371332	0.413085	-0.0236678	0.601969	-0.0405847	0.370993	-0.0194202	0.668691
C1orf53	blue	-0.0539042	0.2346	-0.16584	0.000233565	0.172962	0.000123018	-0.0662517	0.143906	-0.212271	2.23175e-06	-0.100573	0.026306	-0.222662	6.74155e-07	-0.125037	0.00567589	-0.0239556	0.597558	-0.07797	0.0853203	-0.0761401	0.0929347	-0.0662258	0.144063	-0.0319834	0.480869	-0.0480189	0.289753	-0.0653544	0.149425	-0.101596	0.0248079	-0.0724758	0.109812	-0.0747572	0.0990422	-0.0131059	0.772743
IL27	blue	0.421161	2.10728e-22	-0.06421	0.156696	0.012958	0.775239	-0.101308	0.025222	0.108108	0.0168915	0.0480594	0.289347	0.590087	4.12328e-47	0.0394887	0.384061	-0.113322	0.0122443	-0.00936588	0.8365	-0.0497723	0.272482	0.0237617	0.600529	0.0153891	0.734532	-0.0420855	0.353549	-0.0375005	0.408476	-0.0197591	0.66326	-0.0537359	0.236067	0.233366	1.84637e-07	-0.0229025	0.613769
ASAH2	blue	-0.285909	1.2384e-10	0.149774	0.000903821	0.0443812	0.327886	-0.0961868	0.0336438	-0.0459772	0.310774	-0.0444677	0.326944	-0.279584	3.25421e-10	-0.137325	0.00236383	-0.00183065	0.967825	-0.0124025	0.784632	-0.0264063	0.560607	0.0724426	0.109975	-0.011158	0.805789	-0.0159437	0.725343	-0.0278845	0.538866	0.0959808	0.0340278	0.0864308	0.0563919	0.222858	6.58755e-07	0.0174674	0.700306
CRTAM	blue	0.537027	8.31481e-38	0.0797141	0.0785389	0.0348218	0.442784	-0.0308465	0.496608	0.0883423	0.0511339	0.209372	3.08435e-06	0.675304	2.96154e-66	0.164838	0.000255079	-0.0497692	0.272511	-0.0214434	0.636541	-0.061049	0.178169	-0.034396	0.448386	-0.0551301	0.224113	-0.0483621	0.286316	-0.065515	0.148426	-0.0997292	0.0275994	-0.0753624	0.0963314	-0.0694784	0.125339	-0.047417	0.295849
CADM4	blue	-0.160964	0.00035697	-0.186791	3.29059e-05	-0.079878	0.077925	-0.00032147	0.994348	-0.073253	0.106044	-0.0762105	0.0926321	-0.280364	2.89256e-10	-0.114373	0.0114583	-0.117806	0.00919243	0.00947238	0.834667	0.0315343	0.487054	-0.0303139	0.504074	0.131259	0.00367551	0.0983281	0.0298682	0.181536	5.49447e-05	0.0980999	0.0302525	0.0649277	0.152106	0.100105	0.0270163	0.0324673	0.474253
CPN1	blue	0.0225565	0.619136	-0.00915597	0.840114	0.0229994	0.612269	-0.0314056	0.488834	-0.00654468	0.885337	-0.0103531	0.819547	0.117976	0.00909111	-0.0383672	0.397722	0.0220023	0.627776	-0.0256205	0.572335	-0.0126378	0.780649	-0.0101284	0.823399	0.0134207	0.767439	0.0115772	0.798644	-0.00418876	0.926463	0.14577	0.00124149	-0.00776728	0.864108	0.0532078	0.240709	-0.00957762	0.832857
IL2RA	blue	0.373957	1.20922e-17	0.0618229	0.17272	0.0539062	0.234583	-0.109101	0.0159031	0.251207	1.84893e-08	0.0293837	0.517255	0.608198	1.06779e-50	0.0342171	0.450752	-0.0978597	0.0306615	-0.000876578	0.98459	-0.0283922	0.531497	-0.025294	0.577241	-0.0269477	0.552595	-0.0317335	0.484305	-0.0261189	0.564883	-0.0307614	0.497798	-0.0449177	0.322067	0.138681	0.00213654	-0.0299028	0.509878
TIGIT	blue	0.591187	2.53393e-47	0.163505	0.000286604	-0.0124782	0.783349	-0.00887816	0.844903	0.121803	0.00706296	0.0479568	0.290379	0.567081	7.1938e-43	0.117296	0.00950131	-0.120168	0.00787415	-0.0305389	0.500913	-0.0369684	0.415163	-0.0387515	0.393008	-0.0610854	0.17791	-0.0507457	0.263202	-0.0719439	0.11245	-0.0777315	0.0862832	-0.0826973	0.0679581	-0.0618277	0.172687	-0.0440331	0.331698
AKR1C1	blue	-0.144474	0.00137355	-0.0793722	0.0798327	0.0646013	0.154181	-0.066657	0.141464	-0.18038	6.13857e-05	-0.0608786	0.179386	-0.278889	3.61291e-10	-0.0272008	0.548869	-0.0163335	0.718909	-0.0557547	0.2189	-0.00699268	0.877547	-0.0228931	0.613914	-0.0138904	0.759546	-0.00348186	0.938846	-0.042804	0.345385	0.139129	0.00206607	-0.0135758	0.76483	0.0689107	0.128463	-0.000562498	0.990111
DIRC1	blue	0.122272	0.00684455	0.120319	0.00779558	0.116699	0.00987523	-0.0617472	0.173248	0.370415	2.56789e-17	0.038476	0.396383	0.2486	2.61744e-08	-0.00729168	0.872355	-0.0638951	0.158743	0.103108	0.0227283	0.00249879	0.956092	-0.00624988	0.890468	0.0206888	0.648456	-0.00324789	0.942948	0.0277347	0.541049	-0.0453806	0.3171	-0.0179751	0.692034	0.15407	0.000637365	0.0184953	0.683595
MFSD6L	blue	-0.158911	0.000425301	-0.0890007	0.0494201	-0.0515187	0.255989	-0.00213502	0.962479	-0.123353	0.00636424	-0.0406751	0.369927	-0.190971	2.16626e-05	-0.0900356	0.0468239	0.0172705	0.703524	-0.0549473	0.225655	0.00279548	0.950885	0.0384231	0.397034	0.0734647	0.105035	0.0225963	0.618518	-0.0298193	0.511061	-0.0201015	0.657793	0.0205903	0.650018	-0.0074374	0.869827	0.00879675	0.846307
SLC6A12	blue	0.201022	7.63809e-06	-0.0804768	0.0757143	-0.0418343	0.356433	-0.0397522	0.380894	-0.0324976	0.473841	0.0458314	0.312312	0.260254	5.36904e-09	0.188262	2.84337e-05	0.0776222	0.0867277	-0.0594182	0.190066	-0.0367696	0.417676	-0.022003	0.627765	-0.0453981	0.316914	-0.0395539	0.383277	-0.0444279	0.327377	-0.0116268	0.797801	-0.047505	0.294952	-0.114152	0.0116195	-0.0595623	0.188992
TAF1L	blue	-0.135207	0.00276327	0.0367293	0.418188	0.00575242	0.899138	-0.0244705	0.589703	-0.131772	0.00354327	-0.0510485	0.260361	-0.204315	5.36549e-06	-0.0248186	0.584421	-0.0402206	0.375304	-0.0688827	0.128619	-0.04457	0.325831	-0.0139393	0.758726	-0.0161988	0.721131	-0.0275181	0.544215	-0.0409857	0.36628	0.0299844	0.508723	0.00321471	0.94353	-0.0266716	0.556674	-0.00351679	0.938234
BRSK2	blue	-0.157838	0.000465665	-0.0254011	0.57563	-0.00596556	0.895422	-0.0249013	0.583169	-0.117041	0.00965917	-0.041532	0.359922	-0.22197	7.3144e-07	-0.010383	0.819035	-0.0300804	0.507367	-0.0689414	0.128292	-0.0214992	0.635665	-0.0376673	0.406392	0.0260546	0.565841	-0.008946	0.843733	0.0383216	0.398283	0.165279	0.000245397	0.0103155	0.820192	-0.0226399	0.61784	0.0258188	0.569365
CPNE5	blue	0.387553	6.15879e-19	-0.0675181	0.136382	-0.0651809	0.150511	0.03139	0.489051	0.212542	2.16478e-06	0.0525132	0.246913	0.341438	8.65437e-15	0.147576	0.00107691	-0.0945437	0.0368103	-0.0172749	0.703452	-0.0518349	0.253079	-0.0617694	0.173093	0.00105493	0.981455	-0.0335518	0.459609	-0.0060497	0.893956	0.0230585	0.611356	-0.0515037	0.256128	-0.098056	0.0303268	0.012325	0.785944
FAM90A1	blue	-0.20157	7.20463e-06	-0.0991958	0.028445	-0.0475699	0.294292	-0.044911	0.322139	-0.0838223	0.0642842	-0.0595712	0.188926	-0.223179	6.34225e-07	-0.155778	0.000553308	0.0428734	0.344603	0.0176497	0.697331	0.0237384	0.600885	-0.0175429	0.699074	0.0900351	0.0468252	0.135108	0.00278327	0.00470536	0.917424	0.0550253	0.224996	0.0470383	0.299726	0.130876	0.00377711	0.00864839	0.848868
TMEM236	blue	0.150533	0.000850324	0.230363	2.67249e-07	0.0687056	0.129607	-0.0269908	0.551959	0.182632	4.94308e-05	0.0529824	0.242711	0.528594	1.78247e-36	0.150099	0.000880527	-0.051546	0.255738	-0.0376537	0.406563	-0.0764657	0.0915413	-0.0287323	0.52659	-0.0487859	0.282109	-0.0471415	0.298667	-0.0359782	0.427776	-0.0578106	0.202356	-0.0778277	0.0858939	-0.135346	0.00273528	-0.0197581	0.663276
MS4A3	blue	0.124608	0.00584473	0.0968388	0.0324534	0.0264345	0.560189	0.0452796	0.31818	0.00535299	0.906108	0.0327807	0.469996	0.272052	9.96091e-10	0.0927462	0.0405608	-0.0123425	0.785649	-0.0294196	0.516743	-0.04095	0.366698	-0.0162755	0.719865	-0.0275565	0.543654	-0.0355801	0.43291	-0.0378728	0.403835	-0.076689	0.0905957	-0.0406491	0.370234	-0.125461	0.0055134	-0.0163895	0.717985
HLA-DOA	blue	0.446058	3.10761e-25	-0.0165314	0.715649	-0.0640856	0.157503	0.0857272	0.058437	-0.0319451	0.481396	0.0921209	0.041939	0.602871	1.28037e-49	0.263779	3.27362e-09	-0.0671364	0.138617	-0.0668933	0.140055	-0.0805837	0.0753252	-0.0495958	0.274187	-0.0627865	0.166111	-0.0681478	0.132756	-0.0677175	0.135226	-0.132828	0.00328442	-0.112089	0.0132277	-0.363601	1.06508e-16	-0.0574899	0.204874
CD27	blue	0.52713	3.00839e-36	-0.114532	0.0113429	-0.0826784	0.0680211	0.0236184	0.602727	0.136744	0.00246777	0.0413698	0.361802	0.445687	3.43848e-25	0.191062	2.14658e-05	-0.0718545	0.112899	-0.0677872	0.134823	-0.0605928	0.18144	-0.0612649	0.176636	-0.0437747	0.334546	-0.0533152	0.239759	-0.053835	0.235202	-0.0154673	0.733234	-0.0840268	0.0636343	-0.202343	6.63352e-06	-0.0254078	0.575529
GRB14	blue	-0.0837386	0.0645518	0.000396519	0.993029	0.0598632	0.186763	-0.0540166	0.233624	-0.178262	7.50796e-05	-0.0645063	0.154789	-0.199544	8.93256e-06	-0.128697	0.0044053	-0.0204861	0.651673	-0.107195	0.017847	-0.0538933	0.234694	-0.0183111	0.686579	0.0446125	0.325369	-0.0217052	0.63243	-0.0455577	0.315213	0.0615559	0.174586	0.148222	0.00102312	0.0270905	0.550492	0.000769037	0.98648
TNFRSF9	blue	0.393553	1.5823e-19	0.0561924	0.215299	0.0613074	0.176336	-0.0773301	0.0879238	0.208685	3.32792e-06	-0.0124337	0.784104	0.380512	2.92897e-18	-0.0688023	0.129067	-0.108544	0.0164506	-0.00773357	0.864692	-0.0473777	0.296249	-0.0220139	0.627595	-0.0440816	0.331165	-0.0345907	0.44582	-0.0181246	0.689605	-0.0659145	0.145961	-0.04113	0.364595	0.132623	0.0033334	-0.0353046	0.436483
CLEC4D	blue	0.180955	5.8096e-05	0.276473	5.18733e-10	0.152424	0.000729416	-0.0398767	0.379403	0.162705	0.000307225	0.0695257	0.125081	0.398074	5.57987e-20	0.0196611	0.664829	-0.0753784	0.0962605	0.0120401	0.790776	-0.040373	0.373496	-0.000684529	0.987966	-0.00885656	0.845276	-0.0176976	0.696551	-0.0236474	0.602283	-0.0518484	0.252955	-0.019892	0.661136	0.111795	0.0134716	-0.0234061	0.605992
AC008878.3	blue	0.251791	1.70965e-08	0.0901342	0.0465827	-0.0159271	0.725617	0.186612	3.3492e-05	-0.00597201	0.89531	0.110468	0.0146251	0.348085	2.39975e-15	0.355119	5.97164e-16	-0.0447825	0.323527	-0.0713631	0.115389	-0.0568174	0.210231	-0.0359089	0.428668	-0.047914	0.290809	-0.0483794	0.286144	-0.0238831	0.598668	0.0246304	0.587274	-0.0716209	0.114077	-0.310769	2.18516e-12	-0.0301546	0.506319
ZBP1	blue	0.443939	5.52857e-25	0.0199506	0.660199	-0.0176536	0.697268	0.00349508	0.938615	0.103612	0.0220701	0.00822594	0.856168	0.415127	9.44806e-22	0.0747363	0.0991369	-0.0869847	0.054824	-0.0232007	0.609158	-0.0646501	0.153869	-0.0400693	0.377104	-0.0514227	0.256878	-0.0586425	0.195926	-0.0522571	0.249229	-0.0244761	0.589619	-0.0764647	0.0915456	-0.00128091	0.977484	-0.000822007	0.985549
MGST1	blue	-0.0581705	0.199555	-0.183712	4.45133e-05	-0.0644052	0.155438	-0.133266	0.00318228	-0.222727	6.68982e-07	-0.13083	0.00378951	-0.253209	1.41217e-08	-0.163339	0.000290775	-0.0401832	0.375748	-0.0255176	0.573878	0.00465097	0.918375	-0.0351703	0.43823	-0.094366	0.0371676	-0.0272194	0.548596	-0.132019	0.00348114	-0.109769	0.0152662	-0.0960947	0.033815	0.0480174	0.289768	-0.0197586	0.663269
PRSS45	blue	-0.120245	0.00783388	0.0799414	0.0776885	-0.0235671	0.603516	0.00272946	0.952043	-0.142928	0.00154785	-0.0603484	0.18321	-0.183063	4.74081e-05	-0.112818	0.0126382	-0.103293	0.0224856	-0.0443688	0.328022	-0.0400499	0.377336	0.019449	0.668228	-0.0192893	0.670793	-0.0260557	0.565825	-0.0260667	0.565661	0.0995388	0.0278988	0.0216271	0.633655	0.0290722	0.521708	0.0628459	0.16571
CCDC87	blue	-0.224731	5.27477e-07	0.00723426	0.873352	0.098274	0.0299589	-0.01505	0.740168	-0.127029	0.00494847	-0.0533909	0.239092	-0.219484	9.78282e-07	-0.200885	7.75009e-06	-0.0191846	0.672475	0.164288	0.000267678	0.0801792	0.0768065	0.0110336	0.807911	0.0192987	0.67064	0.0535341	0.237833	-0.00676196	0.881557	0.150109	0.000879823	0.0479717	0.290229	0.120628	0.0076378	0.00961465	0.83222
UBD	blue	0.315213	1.01882e-12	-0.0674343	0.136871	-0.0196203	0.665483	-0.0472224	0.297837	-0.008874	0.844975	-0.00496937	0.912809	0.296401	2.3626e-11	-0.082826	0.0675292	0.187737	2.99595e-05	0.0320078	0.480535	0.0359989	0.42751	0.0320746	0.479619	-0.0106984	0.813637	-0.00572702	0.899581	-0.0490684	0.279328	-0.0223408	0.622492	-0.0276809	0.541836	0.130006	0.00401763	-0.0455421	0.315379
POU2AF1	blue	0.298874	1.58315e-11	0.0332563	0.463574	-0.0764935	0.0914232	0.101902	0.0243748	0.130551	0.00386548	0.0390986	0.388781	0.27233	9.56425e-10	0.159113	0.000418081	-0.0691484	0.127148	0.00283559	0.950181	-0.0250711	0.580603	-0.0435984	0.336498	0.0452257	0.318756	0.010134	0.823302	-0.0224201	0.621259	0.104812	0.0205679	-0.0432351	0.340544	-0.121516	0.00720001	-0.00208827	0.9633
HLA-DRB5	blue	0.342055	7.69242e-15	-0.0839243	0.0639592	-0.0660575	0.145087	0.071529	0.114543	0.0143883	0.751207	0.0311953	0.49175	0.434796	6.34178e-24	0.183302	4.63196e-05	-0.0956013	0.0347445	-0.0699039	0.123036	-0.0917092	0.0428678	-0.0499476	0.270793	-0.0743844	0.100742	-0.0710197	0.117154	-0.0686437	0.129953	-0.131658	0.00357225	-0.112666	0.0127593	-0.323779	2.25709e-13	-0.0661722	0.144388
ACTL10	blue	-0.204977	4.99416e-06	-0.0292983	0.518474	-0.0273703	0.546381	-0.0206211	0.649529	-0.0920167	0.0421723	-0.0691225	0.12729	-0.226294	4.37546e-07	-0.138033	0.00224257	0.0317134	0.484583	-0.0608451	0.179626	-0.0173706	0.701888	-0.0188469	0.677915	0.0253127	0.576959	-0.0202821	0.654916	-0.0310529	0.493731	0.103601	0.0220839	-0.0343226	0.449356	-0.000863233	0.984825	0.0465278	0.305008
MSLNL	blue	-0.0510821	0.260046	-0.0255486	0.573413	-0.00957858	0.83284	0.0209127	0.644912	-0.067224	0.138102	-0.0374922	0.408579	-0.17355	0.000116545	-0.00160355	0.971814	0.0311702	0.4921	-0.000158102	0.99722	-0.0209103	0.64495	-0.0212148	0.640142	-0.0370814	0.413737	-0.0279781	0.537503	-0.0505982	0.264594	-0.0377148	0.405801	-0.0475206	0.294793	-0.0701609	0.121661	-0.0401703	0.375902
LAG3	blue	0.394244	1.35075e-19	-0.100791	0.0259799	-0.081025	0.0737353	-0.0231217	0.610378	0.0039673	0.930341	-0.00300742	0.947166	0.311762	1.84472e-12	-0.0743217	0.101031	-0.0506895	0.263731	-0.011317	0.803077	-0.00758091	0.867338	-0.0141925	0.754483	0.00554523	0.902753	-0.0102894	0.820639	-0.0357705	0.43045	0.128657	0.00441774	-0.0223154	0.622889	0.168164	0.000190011	0.0126874	0.77981
RAB38	blue	0.140419	0.00187457	-0.0840624	0.0635217	0.0306463	0.499408	-0.0832593	0.0661018	0.00125754	0.977894	-0.04739	0.296124	0.133083	0.00322472	-0.114511	0.0113582	-0.0536137	0.237135	0.104565	0.0208699	0.00259095	0.954474	-0.0487174	0.282787	-0.0856031	0.0588043	-0.0539807	0.233935	-0.0867466	0.0554935	-0.213369	1.97211e-06	-0.0657714	0.14684	-0.0658442	0.146393	-0.0398564	0.379647
TMEM255A	blue	0.153563	0.000664467	-0.00298638	0.947535	-0.0681399	0.132801	-0.0317869	0.48357	0.163127	0.000296184	0.261599	4.44933e-09	0.34472	4.61179e-15	0.200167	8.36314e-06	-0.0134287	0.767305	0.114496	0.0113693	0.00684617	0.880093	0.045269	0.318293	0.0028007	0.950793	-0.0139577	0.758416	0.0233941	0.606177	-0.0439907	0.332164	0.00205327	0.963915	0.0190004	0.67544	0.00325743	0.942781
OMP	blue	-0.12863	0.00442615	-0.00187092	0.967117	-0.0173456	0.702296	0.00203695	0.964201	-0.133098	0.00322124	-0.0495944	0.274201	-0.201816	7.01822e-06	-0.0761715	0.0927998	0.260702	5.04411e-09	-0.0483857	0.286081	-0.0143842	0.751274	-0.0348207	0.442799	-0.00579706	0.89836	-0.0137617	0.761706	-0.048353	0.286407	-0.000379094	0.993335	0.00448693	0.921245	-0.0118873	0.793371	-0.00159224	0.972013
ACSM5	blue	0.177276	8.23892e-05	0.068229	0.132294	-0.0237264	0.60107	0.0766382	0.0908101	-0.0414436	0.360946	0.0876952	0.052866	0.330918	6.1939e-14	0.261812	4.31862e-09	-0.0254054	0.575564	-0.0498497	0.271735	-0.0502733	0.267678	-0.0209777	0.643884	-0.0191085	0.673699	-0.0338356	0.455819	-0.033851	0.455614	-0.00619358	0.891449	-0.0487887	0.282082	-0.246699	3.36413e-08	-0.0157686	0.728239
FGA	blue	-0.131819	0.00353134	-0.0438968	0.333198	0.00943177	0.835366	-0.0621977	0.170127	-0.0209297	0.644643	-0.04057	0.371167	-0.172407	0.000129433	-0.115722	0.010515	0.0425201	0.348597	-0.0135398	0.765436	-0.000105426	0.998147	0.0165082	0.716032	-0.0160481	0.723618	0.000795307	0.986019	-0.0359278	0.428424	0.0716739	0.113809	-0.00498303	0.91257	0.117074	0.00963897	-0.0144446	0.750265
MEF2B	blue	0.258986	6.40343e-09	-0.0793754	0.0798205	-0.0763395	0.0920796	0.00618476	0.891603	0.105083	0.0202419	-0.0190275	0.675004	0.188658	2.73325e-05	0.0169315	0.709076	-0.108634	0.0163607	-0.0357114	0.431212	0.00751503	0.86848	-0.0206414	0.649209	0.0117516	0.795677	-0.00137023	0.975914	-0.0296042	0.514115	0.0699449	0.122816	-0.0299815	0.508764	-0.00397834	0.930147	0.0231402	0.610093
VAX2	blue	-0.259756	5.7547e-09	-0.152957	0.000698354	-0.0667752	0.140758	-0.085628	0.0587305	-0.0706647	0.119001	-0.0715547	0.114413	-0.336028	2.40365e-14	-0.145007	0.00131771	0.00736082	0.871155	-0.0515962	0.255274	-0.0019659	0.965449	0.0114819	0.800267	0.101242	0.0253173	0.0487349	0.282614	0.206455	4.25167e-06	0.171904	0.000135527	0.0803844	0.0760522	0.238887	9.23471e-08	0.0148671	0.743214
MAB21L3	blue	-0.163799	0.000279363	0.0261979	0.563707	0.0637089	0.159964	-0.0406802	0.369868	-0.0271946	0.548961	-0.0284013	0.531365	-0.147779	0.00105972	-0.0722511	0.110921	0.0742276	0.101464	0.0297674	0.511796	0.0271716	0.549298	0.155245	0.00057836	-0.0212859	0.639021	-0.00286992	0.949578	-0.0429417	0.343834	-0.0360332	0.42707	0.0102402	0.821482	0.0267186	0.555979	-0.0126425	0.780569
TULP1	blue	-0.139808	0.00196308	0.102127	0.0240598	0.0175804	0.698462	0.00717169	0.874438	-0.0285454	0.529283	-0.0129315	0.775686	-0.151813	0.0007666	-0.0661552	0.144492	-0.074225	0.101476	0.0435481	0.337056	0.0444348	0.327302	0.019633	0.665278	0.034912	0.441604	0.046653	0.303707	0.0308402	0.496697	-0.00371198	0.934813	0.0863404	0.0566513	0.121256	0.00732554	0.0692821	0.126413
TAS2R38	blue	-0.124712	0.00580352	0.00435916	0.923481	-0.0151427	0.738625	-0.0356596	0.431881	-0.0761835	0.0927479	-0.0298312	0.510892	-0.14331	0.00150305	-0.0759768	0.0936399	0.0176024	0.698102	-0.016077	0.72314	0.00695419	0.878216	-0.00176021	0.969062	0.0211171	0.641682	0.0255041	0.574081	-0.0295471	0.514927	0.0578864	0.201764	0.0302814	0.504532	-0.0432346	0.340549	0.0249585	0.582303
SYCE1L	blue	-0.105343	0.0199329	-0.154788	0.000600672	-0.0405416	0.371501	-0.0169425	0.708896	-0.0447687	0.323676	-0.0844597	0.0622764	-0.193146	1.73663e-05	-0.138667	0.00213881	-0.0402616	0.374817	-0.0438489	0.333727	-0.0286838	0.527289	-0.0459782	0.310763	-0.0163551	0.718553	0.0221806	0.62499	-0.0167395	0.712228	0.0464988	0.30531	-0.0371996	0.412249	0.0338673	0.455397	0.0137369	0.762124
PNOC	blue	0.287648	9.45503e-11	-0.0506903	0.263724	-0.0244082	0.590651	0.0266503	0.55699	0.136948	0.00243089	0.0227543	0.616065	0.284187	1.61503e-10	0.0980085	0.0304076	-0.0691549	0.127112	-0.0178841	0.693513	-0.0279317	0.538178	-0.0509396	0.261379	0.149727	0.000907247	0.346368	3.35217e-15	-0.00808282	0.858644	0.0760685	0.0932435	-0.0263487	0.561463	-0.0406358	0.370391	0.00517576	0.909203
PYDC1	blue	0.0704269	0.120251	-0.0200711	0.658278	-0.00328639	0.942273	-0.0270831	0.550601	0.0119167	0.792872	-0.00518727	0.909002	0.0842129	0.0630476	-0.0427368	0.346144	0.0370426	0.414225	0.00279789	0.950842	0.0267337	0.555756	0.00760131	0.866984	0.0124652	0.78357	0.0277317	0.541094	-0.00530368	0.906969	0.0117849	0.795112	0.00762814	0.866519	0.0916825	0.0429286	-0.00794755	0.860986
ABHD14A-ACY1	blue	-0.147335	0.00109763	-0.0204924	0.651573	0.0768396	0.0899625	-0.026227	0.563272	-0.239857	8.16114e-08	-0.102494	0.0235541	-0.242556	5.77183e-08	-0.158293	0.000448129	0.100721	0.0260838	-0.0596842	0.188087	-0.0322977	0.476567	-0.0797068	0.0785665	-0.0326776	0.471394	-0.042809	0.345329	-0.0798833	0.0779051	-0.00840834	0.853015	-0.0180839	0.690266	0.0404614	0.37245	0.0533636	0.239333
AC027796.3	blue	-0.216886	1.32104e-06	0.102794	0.0231476	0.022088	0.626437	0.0374495	0.409113	-0.239694	8.33266e-08	-0.0380694	0.401398	-0.296425	2.35367e-11	-0.0610539	0.178134	-0.0826181	0.0682229	-0.106877	0.0181916	-0.0660757	0.144976	-0.0112012	0.80505	0.000489214	0.991399	-0.0158562	0.726791	-0.0659538	0.145721	0.0628892	0.165418	0.060311	0.183483	-0.0884435	0.0508672	0.100703	0.0261107
NKG7	blue	0.526067	4.39254e-36	-0.116632	0.00991792	-0.0518207	0.253209	-0.0503698	0.266759	0.0402879	0.374505	0.0182105	0.688211	0.490569	6.4745e-31	0.0683963	0.131346	-0.0506603	0.264007	-0.000894026	0.984283	-0.0383132	0.398386	-0.0263728	0.561105	-0.0271838	0.549119	-0.0365252	0.420781	-0.0536079	0.237186	-0.0445636	0.3259	-0.0452394	0.31861	0.146303	0.00119067	-0.0233032	0.607578
APOA2	blue	-0.0094293	0.835408	-0.00135029	0.976264	0.00967424	0.831196	-0.0290422	0.522139	-0.0307209	0.498363	-0.0184469	0.684379	0.0821403	0.0698397	-0.0526713	0.245492	0.0265246	0.558851	-0.0025784	0.954694	-0.0134968	0.766159	-0.0115846	0.798519	0.00117173	0.979402	0.00935175	0.836743	-0.0171075	0.706191	0.0411857	0.363945	-0.0135946	0.764514	0.0150702	0.739831	-0.00776649	0.864122
RASD1	blue	-0.1387	0.00213362	-0.123045	0.00649807	-0.0479267	0.290681	-0.0845779	0.0619097	-0.178734	7.17954e-05	-0.0787002	0.0824261	-0.314844	1.08608e-12	-0.0195517	0.666581	-0.04434	0.328336	-0.0836909	0.0647048	-0.0435416	0.337128	-0.0608539	0.179563	-0.0375725	0.407576	-0.0495294	0.274831	-0.0664266	0.142848	0.0733324	0.105665	-0.0654301	0.148953	-0.116352	0.0100983	0.00318518	0.944048
MYBPC2	blue	0.2723	9.6066e-10	-0.0528793	0.24363	-0.0673294	0.137484	0.0502116	0.268266	0.00281036	0.950623	0.0118826	0.793452	0.309074	2.91349e-12	0.131975	0.00349212	-0.00682274	0.880501	-0.0157691	0.728232	-0.0434966	0.337628	-0.0342367	0.450492	-0.0461472	0.308986	-0.0422096	0.352131	-0.0371294	0.413132	-0.0690564	0.127656	-0.0584626	0.197304	-0.16091	0.000358634	-0.0481163	0.288776
NPAS3	blue	-0.146032	0.00121623	-0.0391345	0.388345	-0.0176909	0.69666	-0.0164647	0.716747	-0.0255554	0.573312	-0.001263	0.977798	-0.189468	2.52028e-05	0.0696177	0.124581	-0.0625203	0.167917	-0.0572416	0.20684	-0.0191627	0.672826	-0.0292833	0.518688	0.00545913	0.904255	-0.0189723	0.675893	0.0647138	0.153463	0.0909632	0.0445949	0.0107335	0.813037	-0.0569017	0.209554	0.00673589	0.882011
SLAMF7	blue	0.426582	5.33466e-23	-0.0113829	0.801954	0.0131849	0.771411	-0.0473027	0.297016	0.125066	0.00566456	0.031568	0.486589	0.491268	5.1908e-31	0.03715	0.412873	-0.0396536	0.382078	-0.0233425	0.606972	-0.0465337	0.304947	-0.0360043	0.427441	0.00479408	0.915873	-0.0307156	0.498438	-0.0386482	0.394272	0.00519237	0.908913	-0.0431646	0.341332	0.0229689	0.61274	-0.0323594	0.475725
TTC24	blue	0.469794	3.68768e-28	0.0539729	0.234003	-0.0167809	0.711548	0.0391277	0.388427	-0.02186	0.630003	-0.00246942	0.956607	0.407193	6.48799e-21	0.0683314	0.131713	-0.0870015	0.0547769	-0.0432912	0.339917	-0.0312656	0.490775	-0.0476167	0.293816	-0.031665	0.48525	-0.0365892	0.419967	-0.0552207	0.223351	-0.0274248	0.545581	-0.049477	0.27534	0.0066004	0.884367	-0.00923287	0.83879
CTLA4	blue	0.418948	3.66659e-22	0.211263	2.49867e-06	0.0334385	0.461126	-0.0111146	0.806528	0.113349	0.012224	0.0315284	0.487136	0.504791	6.50286e-33	0.0994834	0.0279864	-0.136097	0.0025884	-0.0371476	0.412903	-0.0421536	0.352771	-0.0431635	0.341345	-0.0520281	0.251312	-0.0558325	0.218257	-0.0464436	0.305885	-0.0175731	0.698582	-0.0743221	0.101029	0.0156381	0.730402	-0.0318174	0.483151
CCL18	blue	0.277348	4.55196e-10	-0.0380243	0.401955	-0.0583199	0.198401	0.0119057	0.793059	0.0414397	0.360992	0.102322	0.0237897	0.528656	1.74331e-36	0.372868	1.52578e-17	-0.0482723	0.287213	-0.0163603	0.718467	-0.0435765	0.336741	0.00227623	0.959999	-0.0194277	0.668569	-0.0300504	0.50779	-0.00962691	0.83201	-0.0415689	0.359494	-0.0293143	0.518245	-0.0628858	0.165441	-0.0466878	0.303346
APOB	blue	0.0442251	0.329592	0.0622542	0.169738	0.0263831	0.560952	-0.012487	0.783201	0.0373859	0.40991	0.01451	0.749172	0.0871718	0.0543026	-0.0334965	0.46035	0.0424119	0.349826	-0.00714847	0.874841	5.47263e-05	0.999038	0.0130434	0.773797	0.00563569	0.901174	0.014674	0.746433	-0.00375455	0.934068	0.0113074	0.803239	0.0111357	0.806168	0.0544623	0.229783	0.0399818	0.378148
SCIN	blue	-0.166047	0.000229343	0.0401678	0.375931	0.0736718	0.104056	-0.0730438	0.107048	-0.0524945	0.247083	-0.0414818	0.360503	-0.191922	1.96741e-05	-0.109984	0.0150667	0.0417612	0.357275	-0.0972535	0.0317149	-0.0390345	0.389559	-0.0279297	0.538208	0.0108259	0.811458	-0.0258077	0.569531	-0.0146044	0.747596	0.112188	0.0131458	0.00318507	0.94405	0.0144974	0.749383	0.127725	0.00471503
CRACR2B	blue	-0.184799	4.00308e-05	-0.176086	9.21077e-05	-0.0790803	0.0809508	0.0728649	0.107912	-0.294555	3.17779e-11	-0.111333	0.0138635	-0.325705	1.59766e-13	-0.0765447	0.0912059	0.120153	0.00788186	-0.101512	0.0249278	-0.0475968	0.294018	-0.0764412	0.0916458	-0.0347745	0.443405	-0.0572397	0.206856	-0.0924778	0.0411476	-0.047354	0.296491	-0.0686917	0.129684	-0.124237	0.00599416	0.0737482	0.103697
ZNF710	blue	-0.133081	0.00322505	-0.103217	0.0225853	-0.0411074	0.364859	-0.0611427	0.177503	-0.137571	0.00232112	-0.0552609	0.223013	-0.224544	5.39321e-07	0.0421683	0.352602	-0.0548812	0.226214	-0.0884407	0.0508747	-0.0338871	0.455133	-0.0537283	0.236132	-0.0307215	0.498356	-0.0418649	0.356081	-0.0422644	0.351505	0.0345848	0.445897	-0.0347386	0.443876	-0.0787942	0.0820591	-6.09775e-05	0.998928
APOF	blue	-0.0451865	0.319177	-0.0130923	0.772972	0.0149313	0.742143	-0.0398936	0.379201	-0.0211715	0.640825	-0.0212343	0.639834	0.0514425	0.256694	-0.0735659	0.104556	0.0105148	0.816778	-0.0403304	0.374	-0.0131301	0.772334	-0.0183402	0.686107	0.0206236	0.649491	-0.000791751	0.986081	-0.00936077	0.836588	0.081075	0.0735571	0.00194278	0.965855	0.0811717	0.073213	0.00864789	0.848877
P2RY12	blue	0.397616	6.20667e-20	0.043661	0.335804	-0.0304366	0.50235	0.0135781	0.764791	0.0777445	0.0862308	0.143763	0.00145135	0.646113	5.25512e-59	0.265694	2.49466e-09	-0.0558513	0.218101	-0.0419874	0.354674	-0.0704728	0.120009	-0.0396941	0.381591	-0.0397643	0.38075	-0.0491279	0.278746	-0.0458771	0.311829	-0.115709	0.0105234	-0.0939461	0.0380231	-0.264884	2.79948e-09	-0.0586221	0.196082
P2RX5	blue	0.320382	4.12727e-13	0.07094	0.117567	-0.0284731	0.530328	0.0502487	0.267912	-0.00305731	0.946291	0.0191853	0.672464	0.22936	3.02016e-07	0.117553	0.00934447	-0.0524945	0.247083	-0.0312627	0.490816	0.00318913	0.943979	-0.0396868	0.381679	-0.0359597	0.428013	-0.0284487	0.530681	-0.0495607	0.274528	0.0917099	0.0428661	-0.0570981	0.207983	0.0300751	0.507442	-0.00171478	0.96986
CHL1	blue	-0.216027	1.45777e-06	0.0395654	0.383139	0.024727	0.585808	-0.00495	0.913148	-0.0133772	0.768172	-0.0533156	0.239757	-0.245054	4.17336e-08	-0.072036	0.11199	-0.0434739	0.337882	-0.0629619	0.164929	-0.0211401	0.64132	-0.0372995	0.410993	-0.0425081	0.348733	-0.0294185	0.516759	-0.0422057	0.352175	0.0466584	0.303651	-0.0431659	0.341318	-0.0481095	0.288843	-0.0109953	0.808565
PLA1A	blue	0.116335	0.0101092	-0.0506471	0.264131	-0.0488582	0.281396	0.0164343	0.717248	-0.0877827	0.052629	0.00369475	0.935115	0.0974823	0.0313138	0.0165099	0.716004	0.0430507	0.342609	-0.0562736	0.214635	-0.0249612	0.582262	-0.015386	0.734582	-0.00272149	0.952183	-0.0108682	0.810736	-0.0273839	0.546182	0.0873225	0.0538858	-0.0128684	0.776751	-0.0222378	0.624099	-0.0346792	0.444657
CLEC12B	blue	0.0746053	0.0997322	0.364456	8.92559e-17	-0.0184004	0.685131	0.0949725	0.0359606	-0.0656961	0.147305	0.159403	0.000407885	0.360879	1.86256e-16	0.304065	6.74565e-12	-0.0748185	0.098765	-0.0470426	0.299683	-0.0338772	0.455265	0.00323525	0.94317	0.00626907	0.890134	0.32274	2.71677e-13	-0.0280637	0.53626	-0.0256657	0.571656	-0.0395072	0.383839	-0.180873	5.85552e-05	-0.0304289	0.502458
EDARADD	blue	-0.163938	0.000275985	-0.0648478	0.152612	0.00137087	0.975903	-0.0247254	0.585833	-0.0532547	0.240294	-0.0304978	0.501491	-0.241322	6.76604e-08	-0.0600492	0.185395	-0.0764971	0.091408	0.0467572	0.302627	0.137983	0.002251	-0.0148204	0.743992	0.0940383	0.0378339	0.0646862	0.153639	0.0281593	0.534871	0.0286552	0.527701	0.18248	5.01622e-05	0.152298	0.000736954	0.0447156	0.324251
ATP6V0A4	blue	-0.194643	1.48937e-05	-0.0674209	0.136949	-0.022985	0.612491	-0.0256508	0.57188	-0.0600243	0.185578	-0.0514127	0.256971	-0.203856	5.63797e-06	-0.0929375	0.0401468	-0.05512	0.224197	-0.0397408	0.381031	0.0285915	0.528618	0.0806955	0.0749196	0.0148443	0.743594	-0.00315296	0.944613	-0.0305785	0.500358	0.0428462	0.344909	0.0426698	0.346901	0.115473	0.0106835	0.0781791	0.0844834
ACTBL2	blue	0.0978472	0.0306829	0.029048	0.522056	-0.000527498	0.990726	0.0173983	0.701435	0.144016	0.00142326	0.00740172	0.870446	0.16307	0.000297654	0.00512019	0.910174	0.0242762	0.592663	0.0730015	0.107252	0.00312509	0.945102	0.00452708	0.920542	-0.047438	0.295635	-0.0218035	0.630889	-0.0219894	0.627978	-0.0960762	0.0338495	-0.0185855	0.682136	-0.00923347	0.838779	-0.00922938	0.83885
CCL7	blue	0.15202	0.00075379	-0.0796654	0.0787223	-0.00950454	0.834114	-0.107228	0.0178123	0.182404	5.05295e-05	-0.0369954	0.414822	0.287633	9.47784e-11	-0.0866411	0.0557924	-0.0490363	0.279644	-0.0110304	0.807965	-0.0327905	0.469863	0.207786	3.67466e-06	-0.00219918	0.961352	-0.0180583	0.690681	-0.0170109	0.707775	-0.070522	0.11975	-0.0131378	0.772205	0.220825	8.36609e-07	-0.00144373	0.974622
EDN2	blue	0.184435	4.148e-05	-0.063654	0.160325	0.00905532	0.841848	-0.0123196	0.786037	0.151258	0.000801928	-0.0323497	0.475857	0.134084	0.00299907	-0.00756579	0.8676	-0.0652328	0.150185	0.0134187	0.767472	-0.0217628	0.631526	-0.0238857	0.598628	-0.0264094	0.560561	0.00426688	0.925096	-0.0217986	0.630966	-0.0723766	0.1103	-0.0534134	0.238894	0.0300887	0.50725	-0.024972	0.582099
PDLIM4	blue	0.217141	1.28286e-06	-0.118359	0.00886685	-0.0300431	0.507894	0.00735962	0.871176	0.219939	9.27809e-07	-0.036869	0.416418	0.207289	3.88055e-06	-0.0608089	0.179885	-0.0678848	0.134262	0.0699473	0.122803	0.0422849	0.351272	-0.0343098	0.449525	-0.0459175	0.311402	-0.0215603	0.634705	-0.00657237	0.884855	-0.103465	0.0222609	-0.0598227	0.187062	0.0546376	0.228285	-0.0111427	0.806048
FSCN2	blue	-0.125091	0.00565485	-0.0393889	0.385265	-0.0119742	0.791895	-0.0435519	0.337014	-0.154322	0.00062423	-0.0920948	0.0419974	-0.233675	1.77695e-07	-0.121338	0.00728556	-0.0499963	0.270326	-0.0793619	0.0798719	-0.0515608	0.255601	-0.0193509	0.669803	-0.027944	0.538	-0.0397689	0.380695	-0.0421097	0.353273	0.0622785	0.169571	-0.0299586	0.509088	-0.0301652	0.50617	0.0272954	0.54748
STUM	blue	-0.272311	9.59089e-10	0.0317363	0.484267	0.0582271	0.199118	-0.0658885	0.146121	-0.13716	0.00239291	-0.0458147	0.312488	-0.29775	1.89996e-11	-0.0735277	0.104737	-0.0897682	0.0474835	-0.104273	0.0212312	-0.0385918	0.394964	-0.0543261	0.230952	0.0295116	0.515432	-0.0133116	0.769276	-0.0163642	0.718403	0.223182	6.33969e-07	0.0298493	0.510635	0.0687508	0.129354	0.0397461	0.380968
CD79A	blue	0.386595	7.63148e-19	-0.0954133	0.0351043	-0.0447962	0.323378	0.0482287	0.287649	0.186582	3.35908e-05	0.0302544	0.504912	0.339494	1.25213e-14	0.165265	0.000245701	-0.0726597	0.108911	-0.0231592	0.6098	-0.0423232	0.350835	-0.0434439	0.338215	-0.0386512	0.394235	-0.0402555	0.374889	-0.0327311	0.470668	-0.00710342	0.875624	-0.0643417	0.155846	-0.146237	0.00119689	-0.0141198	0.7557
PLEKHG4B	blue	-0.16526	0.000245794	-0.0176885	0.696698	-0.0412816	0.362828	0.0173114	0.702856	-0.0484506	0.285435	-0.0385228	0.395809	-0.215537	1.54167e-06	-0.113304	0.0122586	-0.127646	0.00474111	-0.0604715	0.182318	-0.00265723	0.953311	-0.0276655	0.542061	0.193774	1.62854e-05	0.049137	0.278656	0.0562294	0.214997	0.0769661	0.0894327	0.0195909	0.665953	0.0581856	0.199439	0.116007	0.0103241
SDK1	blue	-0.100305	0.0267107	0.00596325	0.895462	0.0861605	0.0571705	0.00595529	0.895601	-0.0201142	0.65759	-0.0335073	0.460205	-0.176743	8.66185e-05	-0.019615	0.665567	-0.11988	0.00802513	-0.0850527	0.060455	-0.0308399	0.4967	-0.0319875	0.480813	0.0021506	0.962205	-0.0124712	0.783469	0.0472886	0.29716	0.0934939	0.0389631	0.0206623	0.648876	-0.0243315	0.591819	0.0679194	0.134062
CHRD	blue	-0.125949	0.00533191	-0.06271	0.166629	-0.011534	0.799381	-0.0543409	0.230825	-0.0855844	0.0588597	-0.0621217	0.17065	-0.217496	1.23144e-06	-0.072894	0.107771	-0.0567292	0.210941	-0.100246	0.0268001	-0.0449945	0.32124	-0.0142463	0.753582	-0.0105436	0.816286	-0.0374747	0.408798	-0.0367389	0.418066	0.136538	0.00250572	-0.0366321	0.419421	-0.0278305	0.539653	0.0442391	0.329439
HSPB9	blue	-0.164723	0.000257662	-0.0845265	0.0620688	-0.0397194	0.381288	-0.00277803	0.951191	-0.131962	0.00349544	-0.065781	0.146782	-0.207572	3.76206e-06	-0.135472	0.00271008	0.0178611	0.693888	-0.0651122	0.150942	-0.025154	0.579352	-0.0157894	0.727896	-0.00495107	0.913129	-0.0179785	0.691979	-0.0229394	0.613197	0.0831176	0.0665658	0.012648	0.780476	0.0358318	0.429659	0.0843858	0.0625064
G6PC	blue	0.0270242	0.551468	-0.0144573	0.750053	0.00970937	0.830592	-0.0313652	0.489394	-0.00983543	0.828427	-0.0149627	0.741621	0.105149	0.0201627	-0.0423533	0.350493	0.0740873	0.102114	-0.00452545	0.920571	-0.00614457	0.892303	-0.00192038	0.966249	-0.00314815	0.944698	0.0101338	0.823307	-0.0173186	0.702737	0.017097	0.706363	-0.0126202	0.780947	0.0493124	0.276942	-0.0159383	0.725433
NCR1	blue	0.361873	1.51978e-16	0.0483927	0.286011	0.0450759	0.320364	-0.0587107	0.195406	0.0539034	0.234607	0.0351558	0.438419	0.391062	2.79152e-19	0.0708296	0.11814	-0.0260767	0.565513	0.0317663	0.483854	0.0014912	0.973788	0.323528	2.36085e-13	-0.033681	0.457881	-0.0264492	0.55997	-0.0463152	0.307226	-0.0604395	0.18255	-0.0371788	0.412511	0.146862	0.00113945	-0.0492739	0.277318
DEFB126	blue	-0.150459	0.000855393	-0.0542628	0.231497	-0.0180552	0.690733	-0.056619	0.21183	-0.114422	0.0114226	-0.0506025	0.264553	-0.183261	4.65047e-05	-0.088941	0.0495737	0.015519	0.732375	0.00404019	0.929064	0.0909141	0.0447107	0.0249142	0.582974	0.0220319	0.627314	0.017811	0.694703	-0.0224508	0.620781	0.0745415	0.100023	0.0323187	0.47628	0.113454	0.0121434	0.014383	0.751295
SDS	blue	0.0192072	0.672112	-0.0446372	0.325101	0.00100788	0.982282	-0.0422348	0.351843	-0.000565277	0.990062	0.0309963	0.494519	0.187303	3.12775e-05	0.0928312	0.0403764	0.0078229	0.863144	-0.00728003	0.872557	-0.0103702	0.819254	0.00335831	0.941012	0.0238462	0.599233	-0.00414402	0.927246	-0.00137203	0.975883	0.0345815	0.445942	0.00877636	0.846659	0.155899	0.000547748	-0.0128249	0.777486
PAK3	blue	-0.170127	0.000159276	-0.00425111	0.925372	0.0756952	0.0948661	-0.0511006	0.259873	-0.0733387	0.105635	-0.0406965	0.369676	-0.246053	3.66206e-08	-0.0287176	0.526801	-0.0550617	0.224689	-0.0860927	0.0573672	-0.0357895	0.430205	-0.0519587	0.251946	0.00253969	0.955374	-0.0351007	0.439138	-0.0123571	0.785402	0.0349766	0.440758	-0.0365594	0.420346	-0.0621003	0.170798	0.0012845	0.977421
CD70	blue	0.265891	2.42559e-09	-0.068178	0.132584	-0.0124506	0.783817	-0.0521634	0.25008	0.159709	0.000397422	0.00781724	0.863242	0.26535	2.61993e-09	-0.0105309	0.816503	-0.0479347	0.290601	0.0105404	0.81634	-0.0358369	0.429593	0.00571755	0.899746	0.00422425	0.925842	0.153085	0.000691024	0.00558051	0.902137	-0.0540365	0.233452	-0.00930868	0.837484	0.222831	6.60888e-07	0.00222086	0.960971
ERO1B	blue	-0.177821	7.82721e-05	0.0234509	0.605302	0.0124305	0.784157	-0.0493304	0.276766	-0.130155	0.0039753	-0.0217369	0.631932	-0.257015	8.40492e-09	0.0214559	0.636345	-0.101169	0.0254237	-0.0916281	0.0430528	-0.0205349	0.650898	-0.0367012	0.418545	0.0335039	0.460251	-0.00539842	0.905315	-0.0231706	0.609624	0.109643	0.0153849	0.0127749	0.778331	-0.0628031	0.165999	0.0130132	0.774308
PDYN	blue	0.123787	0.00617996	0.0481253	0.288685	-0.00449787	0.921053	0.0135406	0.765422	0.0618782	0.172336	0.0126648	0.780192	0.299676	1.38913e-11	0.1198	0.00806734	0.0999465	0.0272611	0.0308234	0.496932	-0.0362483	0.424314	-0.0146401	0.746999	-0.0125559	0.782035	-0.0236456	0.60231	0.275223	6.2456e-10	-0.0594665	0.189706	-0.0331003	0.465675	-0.0295458	0.514946	-0.0430536	0.342576
CLLU1OS	blue	0.0711922	0.116265	-0.0305432	0.500853	0.0167438	0.712157	-0.0499832	0.270452	0.0392016	0.387532	-0.0180736	0.690433	0.194494	1.51236e-05	-0.0613013	0.176379	0.0448411	0.322894	0.00829807	0.854921	-0.00472808	0.917027	-0.00847731	0.851823	0.0396804	0.381756	0.0381943	0.399854	-0.0179442	0.692537	-0.0112763	0.803771	-0.0126255	0.780858	0.0413294	0.362272	-0.0121669	0.788626
CXCL9	blue	0.457793	1.18766e-26	0.0109364	0.80957	-0.0212682	0.6393	-0.0872586	0.0540623	0.0478189	0.291769	0.0614326	0.175453	0.484085	4.9161e-30	-0.0644029	0.155452	-0.0759754	0.0936457	-0.0118146	0.794607	-0.0249468	0.582481	-0.00621573	0.891063	0.0188517	0.677836	-0.018396	0.685203	-0.0372503	0.411612	0.0180644	0.690583	-0.000789098	0.986128	0.165069	0.000249973	-0.0296651	0.513249
FCER2	blue	0.214249	1.78495e-06	-0.0399683	0.378309	-0.0509962	0.26085	0.109609	0.015417	-0.00093221	0.983612	0.0496013	0.274134	0.243171	5.33042e-08	0.190287	2.3211e-05	-0.0260291	0.566221	-0.0398735	0.379442	-0.0245411	0.588631	-0.0192101	0.672065	-0.0285212	0.529633	-0.0311581	0.492267	-0.0145941	0.747767	-0.0299189	0.50965	-0.0486098	0.283852	-0.199658	8.82629e-06	-0.0260206	0.566349
ODC1	blue	-0.204396	5.3185e-06	-0.082304	0.0692821	0.00185935	0.967321	-0.0593761	0.190381	-0.15201	0.000754392	-0.0430551	0.34256	-0.27455	6.89944e-10	0.0438135	0.334117	-0.0536689	0.236651	-0.0613183	0.176259	-0.0210968	0.642004	-0.0177361	0.695924	0.0102395	0.821494	-0.0136054	0.764333	-0.0140025	0.757666	0.0313636	0.489416	0.031789	0.483541	0.00856342	0.850335	-0.00586887	0.897108
FURIN	blue	-0.185951	3.57498e-05	-0.112654	0.012769	-0.0299593	0.509078	-0.0563134	0.214311	-0.072802	0.108218	-0.0698071	0.123557	-0.252135	1.63229e-08	-0.0945318	0.0368342	0.0907749	0.04504	-0.00407297	0.92849	0.00414287	0.927266	0.00420861	0.926116	-0.0168381	0.710609	-0.00116617	0.9795	-0.0496013	0.274134	-0.00415281	0.927092	-0.00663323	0.883796	0.165365	0.000243536	-0.0176915	0.69665
CXCL13	blue	0.329913	7.44653e-14	-0.017938	0.692636	-0.0201772	0.656587	0.0345707	0.446083	0.0508209	0.262494	0.035086	0.439329	0.338101	1.62885e-14	0.125443	0.00552053	-0.0743024	0.101119	-0.0238141	0.599725	-0.0220304	0.627338	-0.0141517	0.755165	-0.00537634	0.9057	0.120674	0.00761455	-0.0275373	0.543935	-0.033978	0.453924	-0.0452391	0.318613	-0.047418	0.295839	-0.0208558	0.645811
CCL1	blue	0.15223	0.000741043	-0.0475092	0.29491	-0.00340045	0.940274	0.0377589	0.405251	0.0943832	0.0371328	-0.0298869	0.510103	0.175815	9.44717e-05	-0.0497168	0.273017	-0.028783	0.52586	-0.0137167	0.762463	-0.0266897	0.556406	-0.01809	0.690166	-0.024069	0.595824	-0.0185995	0.68191	-0.0174946	0.699861	-0.0389392	0.390719	-0.0247701	0.585155	0.00670123	0.882613	-0.0200809	0.658122
KCNK15	blue	-0.0166038	0.714459	-0.104883	0.0204819	-0.0525495	0.246586	-0.0203678	0.653553	-0.0184572	0.684213	0.0470157	0.299959	-0.125669	0.00543553	-0.00441741	0.922461	0.0755087	0.0956848	-0.0237804	0.600242	-0.0145081	0.749204	0.00630202	0.88956	-0.0278024	0.540063	-0.0231415	0.610073	-0.0301832	0.505916	-0.0131434	0.772111	-0.0198359	0.662032	-0.0488047	0.281924	-0.0173839	0.70167
MMP8	blue	-0.029333	0.517979	0.010031	0.825069	0.0415677	0.359509	-0.0735348	0.104703	0.175141	0.00010059	-0.0048359	0.915142	0.145901	0.00122884	0.0362023	0.424902	0.0209282	0.644666	0.00674953	0.881774	-0.0196316	0.665302	-0.00890356	0.844465	-0.0126174	0.780994	-0.00156686	0.972459	0.00451601	0.920736	-0.0467789	0.302403	0.000528138	0.990715	-0.039141	0.388266	-0.015035	0.740417
SLC25A41	blue	-0.0223074	0.623014	-0.031493	0.487625	-0.0234204	0.605772	-0.0192193	0.671916	-0.131948	0.00349889	0.0148578	0.743368	-0.110472	0.014621	-0.0138281	0.760592	-0.0488152	0.28182	-0.058032	0.20063	-0.0115695	0.798776	-0.00398354	0.930056	-0.0162702	0.719952	0.000710285	0.987513	-0.0599356	0.18623	-0.0196852	0.664443	-0.0355361	0.433478	-0.0697591	0.123816	-0.0188229	0.678302
CRLF2	blue	0.0773373	0.0878942	0.0523141	0.248713	0.0591018	0.192441	-0.00524489	0.907996	0.121193	0.00735658	-0.0386112	0.394725	0.133854	0.00304955	-0.0647843	0.153015	-0.0520059	0.251515	0.00622435	0.890913	-0.0320135	0.480457	-0.0303751	0.503215	-0.0662199	0.144098	-0.0446187	0.325301	-0.0455561	0.315231	-0.104937	0.0204174	-0.0645763	0.154341	0.0143697	0.751518	-0.0320198	0.48037
HPN	blue	-0.0889615	0.0495209	-0.142871	0.00155466	-0.0443866	0.327827	-0.0592434	0.191376	-0.217938	1.17024e-06	-0.0830647	0.0667397	-0.246315	3.5383e-08	-0.094251	0.0374003	0.0104658	0.817617	-0.0990313	0.0287103	-0.0511536	0.259379	-0.00384345	0.93251	-0.0387076	0.393545	-0.0304917	0.501575	-0.079243	0.0803263	0.0390235	0.389693	-0.0241247	0.594974	-0.075865	0.094125	-0.025364	0.576188
IL17A	blue	0.193545	1.66719e-05	0.0291961	0.519934	-0.0206544	0.649002	-0.0341543	0.451583	-0.032766	0.470195	-0.0155286	0.732216	0.147611	0.00107392	-0.00895404	0.843594	-0.042957	0.343661	-0.0291666	0.520357	-0.0245373	0.588687	-0.0288278	0.525217	-0.0184721	0.683971	-0.0247976	0.584739	-0.0256523	0.571857	-0.0185272	0.683079	-0.0303324	0.503815	0.0461386	0.309076	-0.00811227	0.858135
CRHR2	blue	-0.120904	0.00749945	-0.00150533	0.97354	-0.0127039	0.779531	-0.0206164	0.649605	-0.0959337	0.0341159	-0.0112964	0.803428	-0.157899	0.000463269	0.0488654	0.281325	-0.0560033	0.216849	-0.0498084	0.272133	-0.022538	0.619424	-0.0213614	0.637831	-0.00807983	0.858696	-0.0174702	0.70026	-0.0116859	0.796796	0.0721529	0.111408	0.0122455	0.787292	-0.0951864	0.035543	-0.0178897	0.693422
IFNG	blue	0.361364	1.68672e-16	0.278281	3.95883e-10	0.0675445	0.136229	-0.0702053	0.121425	0.0361321	0.425801	0.00184793	0.967521	0.368166	4.1222e-17	-0.0811859	0.0731626	-0.0719386	0.112477	-0.0120513	0.790587	-0.044489	0.326711	0.00199981	0.964853	-0.0256994	0.571152	-0.0273262	0.547027	-0.0471248	0.298838	-0.0450395	0.320755	-0.00582547	0.897864	0.191665	2.01928e-05	-0.0277305	0.541111
ERICH5	blue	-0.206764	4.11043e-06	-0.0972608	0.0317022	-0.0138564	0.760118	0.0987977	0.0290906	-0.170978	0.000147445	-0.0325946	0.472522	-0.242637	5.71159e-08	-0.125039	0.00567504	0.203384	5.9322e-06	-0.0621507	0.170451	0.0213274	0.638368	0.0312699	0.490715	0.0301874	0.505857	0.0164751	0.716576	-0.033399	0.461656	0.177251	8.25839e-05	0.0370091	0.414648	0.133148	0.00320947	0.000920135	0.983825
GALNTL6	blue	-0.16358	0.000284746	0.0430105	0.34306	0.0634856	0.161436	-0.0359857	0.42768	-0.102243	0.0238987	-0.0428486	0.344882	-0.217758	1.19476e-06	-0.0116387	0.797599	-0.0443374	0.328364	-0.06643	0.142827	-0.026077	0.565507	-0.0459103	0.311479	-0.00980064	0.829024	-0.0212814	0.639092	-0.0110212	0.808121	0.0358827	0.429005	-0.0219431	0.628703	-0.048382	0.286118	0.00192228	0.966215
CD19	blue	0.391841	2.33848e-19	-0.0469766	0.300362	-0.0520812	0.250828	0.11994	0.00799352	0.0259726	0.567066	0.0479028	0.290923	0.356948	4.13588e-16	0.222278	7.05436e-07	-0.0674709	0.136658	-0.0629192	0.165216	-0.0402396	0.375078	-0.0445389	0.326169	-0.0323748	0.475515	-0.0429074	0.34422	-0.0347292	0.443999	0.0154566	0.73341	-0.0444084	0.327589	-0.172252	0.000131281	-0.0188701	0.677541
ZNF80	blue	0.340652	1.00518e-14	0.306582	4.43299e-12	0.0650699	0.151208	0.0648242	0.152762	0.0272968	0.54746	0.0512587	0.2584	0.39302	1.78751e-19	0.139152	0.00206242	-0.11039	0.0146949	-0.0582179	0.199189	-0.0461766	0.308677	-0.0202029	0.656177	-0.0358528	0.42939	-0.0460192	0.310331	-0.0478945	0.291006	-0.0361256	0.425884	-0.031478	0.487833	-0.11496	0.0110389	0.00782023	0.863191
VTN	blue	0.0123321	0.785824	-0.00655871	0.885092	0.0130217	0.774164	-0.022071	0.626703	-0.0214801	0.635964	0.0238326	0.599442	0.132669	0.00332235	-0.0276037	0.542964	0.0267821	0.555041	-0.0162179	0.720815	-0.0121507	0.788901	0.0019356	0.965981	0.00775949	0.864243	0.00685949	0.879862	-0.00788246	0.862113	0.103093	0.0227489	-0.00510478	0.910443	0.0471625	0.298451	0.0100311	0.825067
KRT36	blue	0.0980248	0.0303799	-0.0537096	0.236296	-0.000711253	0.987496	-0.0478907	0.291045	-0.0050553	0.911308	0.010243	0.821433	0.143272	0.00150736	0.0287556	0.526254	0.0125644	0.781891	0.0296177	0.513923	0.132049	0.00347358	-0.0182775	0.687124	0.0627594	0.166294	0.153471	0.0006695	-0.00714213	0.874952	0.131245	0.00367913	0.0266961	0.556312	0.105747	0.0194599	0.00556034	0.902489
HAMP	blue	0.234391	1.62561e-07	-0.111996	0.0133041	-0.0514491	0.256633	-0.0728552	0.107959	0.0173642	0.701993	0.0325095	0.473679	0.335691	2.55968e-14	0.0446241	0.325243	0.032596	0.472503	-0.0249227	0.582844	-0.00707748	0.876074	0.0022164	0.96105	0.019071	0.674302	-0.0102337	0.821594	-0.0181527	0.689148	-0.00992023	0.826971	-0.0254483	0.574919	0.0617939	0.172923	0.00815426	0.857408
KIAA1324	blue	-0.180634	5.99093e-05	-0.0628728	0.165528	0.00919591	0.839426	0.0384973	0.396123	-0.216321	1.4094e-06	-0.0536071	0.237193	-0.249732	2.25196e-08	-0.0471344	0.298739	-0.00618572	0.891586	-0.101753	0.0245846	-0.00928408	0.837908	-0.0336981	0.457652	0.013781	0.761382	-0.0279081	0.538522	-0.0553909	0.221925	0.0900567	0.0467721	-0.0384491	0.396715	-0.121285	0.00731145	0.0300959	0.507148
PRSS51	blue	-0.122601	0.0066951	0.0352659	0.436986	-0.0184491	0.684343	-0.0443227	0.328524	-0.037705	0.405922	-0.0142211	0.754004	-0.166969	0.000211356	-0.0326009	0.472435	0.144259	0.00139664	-0.0537764	0.235713	-0.0211321	0.641446	0.0120489	0.790627	0.0272583	0.548025	-0.00580956	0.898142	-0.00651533	0.885847	0.183797	4.41459e-05	-0.00706986	0.876207	0.0916489	0.0430052	0.00860352	0.849643
NPIPB6	blue	-0.138399	0.00218222	0.00300042	0.947289	-0.0323739	0.475526	0.0716136	0.114114	-0.140967	0.00179818	-0.0309847	0.494681	-0.166923	0.000212224	-0.0460414	0.310097	-0.0210019	0.643502	-0.000235031	0.995868	0.019883	0.66128	0.0241529	0.594544	-0.0111236	0.806374	0.00318039	0.944132	-0.0439552	0.332555	0.0597737	0.187424	0.0660637	0.145049	0.0481338	0.288599	0.0262945	0.562269
HYAL4	blue	0.0773564	0.0878154	0.0827395	0.0678172	0.0357865	0.430243	0.00817313	0.857082	0.0180661	0.690554	-0.0168974	0.709636	0.156485	0.000521635	-0.0693215	0.126196	0.0825251	0.0685352	0.0506932	0.263697	0.0225973	0.618503	-0.0025081	0.955928	-0.0149583	0.741694	-0.012269	0.786893	-0.0303528	0.503527	-0.0386042	0.394811	-0.00968728	0.830972	0.12276	0.00662412	-0.0318147	0.483188
PLA2G2D	blue	0.472247	1.78288e-28	-0.061206	0.177053	-0.0630245	0.164508	-0.0305776	0.50037	-0.00496442	0.912896	0.207146	3.94191e-06	0.497479	7.11297e-32	0.0713153	0.115633	-0.070879	0.117883	-0.0328837	0.4686	0.0392848	0.386523	0.00182049	0.968003	0.012041	0.790761	-0.00732014	0.871861	-0.0267817	0.555046	0.0509292	0.261477	-0.0163127	0.719252	0.0191488	0.673052	-0.0263378	0.561625
CCL19	blue	0.449296	1.27863e-25	-0.0895678	0.047983	-0.0864662	0.0562908	0.0921142	0.0419539	0.0174374	0.700797	0.0630329	0.164451	0.399227	4.26678e-20	0.175652	9.59177e-05	-0.0704042	0.120371	-0.0523334	0.248537	-0.037167	0.412659	-0.0306457	0.499417	-0.0474396	0.295618	-0.0410907	0.365054	-0.0460417	0.310094	-0.0588506	0.194341	-0.0750398	0.0977691	-0.211659	2.39041e-06	-0.0386245	0.394562
CDH10	blue	0.0441282	0.330654	0.00536618	0.905878	-0.0125332	0.782419	0.00598367	0.895106	-0.0709452	0.11754	0.000561647	0.990126	0.101032	0.0256238	0.0343892	0.448475	0.0140163	0.757435	-0.00710285	0.875634	-0.00937318	0.836374	0.00702275	0.877025	0.0198394	0.661977	0.0522413	0.249372	-0.0017449	0.969331	0.0935992	0.0387425	0.000352646	0.9938	0.0233737	0.606491	-0.0058348	0.897702
FAM3B	blue	-0.160114	0.000383925	-0.127075	0.00493303	-0.0436302	0.336146	-0.0412545	0.363143	-0.184396	4.16401e-05	-0.0778068	0.0859785	-0.233914	1.72502e-07	-0.120214	0.0078499	0.103414	0.0223265	-0.0937806	0.038365	0.0154827	0.732977	0.0534032	0.238984	0.0335138	0.460118	-0.00240565	0.957727	-0.0588071	0.194671	0.163349	0.000290523	-0.0358808	0.429029	0.00991051	0.827138	-0.0159242	0.725666
IL21	blue	0.333557	3.80695e-14	0.185602	3.69967e-05	0.24508	4.1589e-08	-0.0489783	0.280213	0.073395	0.105367	0.071196	0.116245	0.42212	1.65582e-22	-0.0039403	0.930814	-0.0892536	0.048775	-0.0505464	0.265084	-0.00179533	0.968445	0.0242244	0.593451	-0.00999393	0.825706	-0.0211593	0.641016	-0.0237867	0.600146	-0.00193658	0.965964	-0.000855729	0.984957	0.0797147	0.0785367	-0.0257089	0.57101
FXYD4	blue	-0.132935	0.00325915	-0.0697062	0.124102	-0.0271664	0.549375	-0.0462226	0.308195	-0.140289	0.00189304	-0.0429386	0.343868	-0.195892	1.30903e-05	-0.0217171	0.632243	0.0134575	0.76682	-0.0387636	0.39286	-0.0151344	0.738764	0.105669	0.0195503	-0.0163996	0.71782	-0.0176587	0.697185	-0.0423769	0.350224	0.00315854	0.944516	-0.0120215	0.791092	-0.020242	0.655554	-0.0261895	0.563832
SLC7A2	blue	-0.249837	2.22067e-08	-0.0132791	0.769823	0.0714363	0.115015	-0.0664033	0.142988	-0.135895	0.00262731	-0.0471383	0.2987	-0.334219	3.36722e-14	-0.0682054	0.132428	-0.00630539	0.889502	-0.059956	0.18608	-0.0277739	0.540478	0.0278392	0.539526	-0.0154138	0.734121	-0.0232474	0.608438	-0.0360257	0.427166	0.108356	0.0166399	0.0129935	0.77464	0.0686158	0.130109	-0.00980871	0.828886
PLGLB2	blue	0.00181918	0.968026	0.111504	0.0137178	0.033044	0.466435	-0.00325268	0.942865	-0.00321491	0.943527	0.00246444	0.956695	0.13954	0.0020031	-0.0167208	0.712536	0.0154527	0.733475	-0.000764043	0.986568	0.00929715	0.837683	0.0147383	0.74536	0.00956512	0.833072	0.0124318	0.784135	-0.0139934	0.757819	0.0238756	0.598783	-0.00919309	0.839475	0.0195859	0.666034	-0.0068811	0.879486
HMHB1	blue	0.133279	0.00317936	-0.059396	0.190232	-0.0367752	0.417606	-0.0695929	0.124716	0.178137	7.59703e-05	-0.00766808	0.865827	0.138475	0.00216971	0.0482621	0.287315	-0.0941712	0.0375624	-0.0431174	0.341861	-0.0527268	0.244994	-0.0332072	0.464235	0.00298019	0.947644	-0.0226868	0.617112	0.000971658	0.982919	0.055452	0.221415	-0.0136642	0.763344	0.0327281	0.470709	0.0365881	0.419981
FGG	blue	-0.133562	0.00311487	-0.0323015	0.476515	0.0410093	0.366005	-0.0658233	0.146521	-0.0457595	0.313072	-0.0387429	0.393114	-0.17926	6.83023e-05	-0.0931164	0.0397631	0.0359337	0.428348	-0.0372678	0.411392	-0.0112676	0.803919	0.000564827	0.99007	-0.0128939	0.776321	-0.0079874	0.860296	-0.0346421	0.445143	0.0287726	0.52601	0.0368728	0.416371	0.0588701	0.194193	-0.00741755	0.870171
